# Supplementary material
Source: publisher figshare collection journal article supplement (https://acs.figshare.com/ndownloader/files/9112363)
Supplement: Supplementary file 1 [file 9112363]

14
PhNH2
C        1.195995000      1.237366000     -0.088942000
C       -0.202255000      1.260966000     -0.095224000
C       -0.938050000      0.059350000     -0.013311000
C       -0.233512000     -1.160077000      0.075828000
C        1.165089000     -1.171573000      0.080668000
C        1.893346000      0.023891000     -0.000669000
H        1.742806000      2.178139000     -0.150780000
H       -0.733575000      2.211059000     -0.168810000
H       -0.788678000     -2.097344000      0.135982000
H        1.687506000     -2.125411000      0.152503000
H        2.981883000      0.010404000      0.005707000
N       -2.341721000      0.071744000     -0.090673000
H       -2.790342000     -0.731230000      0.346716000
H       -2.769281000      0.939847000      0.226843000
5
CH4
C        0.000000000      0.000000000      0.000000000
H        0.632732000      0.632732000      0.632732000
H       -0.632732000     -0.632732000      0.632732000
H       -0.632732000      0.632732000     -0.632732000
H        0.632732000     -0.632732000     -0.632732000
238
1a
Y       -1.715061000     -0.923591000     -0.299797000
Y        1.685323000     -0.978852000     -0.303449000
Y        0.029456000      1.845084000     -0.220079000
N       -3.607901000     -1.618096000      1.019382000
N       -3.614988000     -2.196798000     -1.170145000
N        3.229015000     -2.254767000      1.032551000
N        3.786268000     -1.916886000     -1.136263000
N        0.332179000      3.851741000      1.049546000
N       -0.125789000      4.124892000     -1.156854000
C        0.025772000     -0.016096000      1.211103000
H        0.037700000      0.806251000      1.963427000
H        0.045776000     -0.935187000      1.837171000
C       -0.013665000     -0.021913000     -2.174173000
H        0.876868000     -0.470500000     -2.667076000
H       -0.848526000     -0.576229000     -2.660284000
H       -0.076563000      0.974122000     -2.659471000
C        2.472406000      1.337002000     -0.815079000
H        2.481248000      2.443186000     -0.824252000
H        3.309282000      1.086102000     -0.133232000
H        2.810034000      1.051720000     -1.830562000
C       -2.403440000      1.463555000     -0.800109000
H       -2.580035000      2.302941000     -0.099418000
H       -2.290874000      1.915827000     -1.802507000
H       -3.390500000      0.960885000     -0.831926000
C       -0.085830000     -2.794635000     -0.658340000
H       -0.651019000     -3.366656000      0.103406000
H        0.836817000     -3.394132000     -0.783180000
H       -0.626934000     -2.948132000     -1.614972000
C       -4.274067000     -2.250427000      0.016798000
C       -5.623653000     -2.928488000      0.195735000
C       -5.864262000     -3.771864000      1.277747000
H       -5.081030000     -3.957813000      1.997602000
C       -7.096730000     -4.385869000      1.431514000
H       -7.267141000     -5.043112000      2.274463000
C       -8.106947000     -4.159714000      0.508960000
H       -9.070914000     -4.638110000      0.630570000
C       -7.879017000     -3.317980000     -0.569087000
H       -8.664436000     -3.133244000     -1.290583000
C       -6.644780000     -2.708442000     -0.725634000
H       -6.476786000     -2.045919000     -1.561830000
C       -4.140030000     -1.404461000      2.350043000
C       -3.553639000     -2.067032000      3.448809000
C       -4.041250000     -1.822579000      4.727520000
H       -3.596659000     -2.332947000      5.570466000
C       -5.079961000     -0.939228000      4.944701000
H       -5.445470000     -0.761707000      5.947543000
C       -5.639836000     -0.275036000      3.870988000
H       -6.440987000      0.429546000      4.045078000
C       -5.190280000     -0.488973000      2.573757000
C       -2.366355000     -3.038139000      3.299158000
H       -2.096682000     -3.087236000      2.246443000
C       -1.130778000     -2.527683000      4.082247000
H       -0.911265000     -1.497060000      3.824761000
H       -0.260988000     -3.134384000      3.847625000
H       -1.300570000     -2.580629000      5.152739000
C       -2.716081000     -4.478106000      3.752661000
H       -1.852980000     -5.124581000      3.623836000
H       -3.533376000     -4.888646000      3.169377000
H       -3.001069000     -4.499668000      4.799655000
C       -5.831052000      0.330596000      1.437059000
H       -5.424442000     -0.013693000      0.490597000
C       -7.368607000      0.152304000      1.377833000
H       -7.846251000      0.574974000      2.255435000
H       -7.635821000     -0.897348000      1.316945000
H       -7.766258000      0.657664000      0.502635000
C       -5.470392000      1.830522000      1.573668000
H       -5.881531000      2.247232000      2.487669000
H       -5.870922000      2.390227000      0.733726000
H       -4.393238000      1.963000000      1.591539000
C       -3.983735000     -2.921093000     -2.369143000
C       -4.430300000     -2.203714000     -3.500201000
C       -4.679796000     -2.884538000     -4.684887000
H       -5.013643000     -2.334057000     -5.553327000
C       -4.513491000     -4.252943000     -4.775122000
H       -4.715511000     -4.767878000     -5.705055000
C       -4.086515000     -4.956824000     -3.667068000
H       -3.955732000     -6.027470000     -3.740159000
C       -3.812064000     -4.318703000     -2.462551000
C       -4.641449000     -0.677803000     -3.472770000
H       -4.514318000     -0.339674000     -2.448082000
C       -3.590577000      0.048387000     -4.348170000
H       -2.583236000     -0.218289000     -4.045294000
H       -3.702243000      1.124563000     -4.254858000
H       -3.708982000     -0.216716000     -5.394144000
C       -6.067510000     -0.268090000     -3.920608000
H       -6.234428000     -0.502874000     -4.966611000
H       -6.199194000      0.802187000     -3.791340000
H       -6.826963000     -0.775553000     -3.334993000
C       -3.308539000     -5.179931000     -1.287695000
H       -3.130453000     -4.530573000     -0.434280000
C       -4.357554000     -6.239155000     -0.864653000
H       -5.311348000     -5.774366000     -0.640067000
H       -4.016886000     -6.767270000      0.021080000
H       -4.511870000     -6.968132000     -1.653485000
C       -1.967008000     -5.876163000     -1.628020000
H       -2.091305000     -6.587935000     -2.437533000
H       -1.597183000     -6.412880000     -0.759500000
H       -1.217945000     -5.149672000     -1.924606000
C        4.140945000     -2.478110000      0.047475000
C        5.417184000     -3.281185000      0.247818000
C        6.238264000     -3.051610000      1.349209000
H        5.972594000     -2.289133000      2.066376000
C        7.401286000     -3.783726000      1.525449000
H        8.032022000     -3.590356000      2.383568000
C        7.755813000     -4.758972000      0.605720000
H        8.663834000     -5.332596000      0.744717000
C        6.943401000     -4.997503000     -0.492341000
H        7.211997000     -5.759718000     -1.212375000
C        5.783219000     -4.261671000     -0.671255000
H        5.150664000     -4.458868000     -1.524106000
C        3.296045000     -2.826701000      2.362281000
C        3.540705000     -1.986797000      3.469507000
C        3.551176000     -2.534557000      4.747092000
H        3.740853000     -1.893467000      5.596601000
C        3.322841000     -3.880439000      4.955353000
H        3.335836000     -4.288091000      5.957590000
C        3.066670000     -4.698987000      3.873207000
H        2.872402000     -5.749357000      4.039266000
C        3.046317000     -4.198765000      2.576814000
C        3.772357000     -0.469569000      3.328929000
H        3.730565000     -0.213809000      2.272398000
C        5.162047000     -0.031855000      3.857017000
H        5.263994000     -0.246201000      4.915976000
H        5.289135000      1.037225000      3.715346000
H        5.963361000     -0.538460000      3.329644000
C        2.659571000      0.328067000      4.053179000
H        2.712662000      0.181367000      5.127263000
H        1.679447000      0.012041000      3.713327000
H        2.766361000      1.389406000      3.850138000
C        2.699814000     -5.167825000      1.430176000
H        2.780254000     -4.631668000      0.488692000
C        3.669920000     -6.373841000      1.368065000
H        4.700570000     -6.040747000      1.309723000
H        3.455313000     -6.977416000      0.491048000
H        3.565197000     -7.004998000      2.244283000
C        1.238211000     -5.665239000      1.555087000
H        1.105407000     -6.259446000      2.453533000
H        0.976841000     -6.280046000      0.698934000
H        0.551177000     -4.826125000      1.596972000
C        4.607294000     -1.879435000     -2.328055000
C        5.737984000     -1.039915000     -2.412925000
C        6.443107000     -0.970540000     -3.609213000
H        7.309450000     -0.327312000     -3.676187000
C        6.056622000     -1.698355000     -4.716867000
H        6.616385000     -1.626804000     -5.640079000
C        4.946577000     -2.516599000     -4.635911000
H        4.643168000     -3.083827000     -5.504796000
C        4.215026000     -2.626166000     -3.460155000
C        6.217256000     -0.166320000     -1.237415000
H        5.562378000     -0.342177000     -0.387840000
C        7.660542000     -0.527824000     -0.804650000
H        7.746052000     -1.585314000     -0.579385000
H        7.934243000      0.034517000      0.083222000
H        8.372252000     -0.288303000     -1.587930000
C        6.132300000      1.341078000     -1.584409000
H        6.803616000      1.591787000     -2.399279000
H        6.411193000      1.936903000     -0.720528000
H        5.123448000      1.613531000     -1.876085000
C        2.986033000     -3.555293000     -3.446384000
H        2.595580000     -3.582102000     -2.432269000
C        1.867843000     -3.017297000     -4.373150000
H        1.616806000     -1.991748000     -4.122382000
H        0.972523000     -3.623983000     -4.273559000
H        2.181157000     -3.041839000     -5.412096000
C        3.337598000     -5.011629000     -3.842743000
H        3.678301000     -5.067594000     -4.871353000
H        2.458224000     -5.641442000     -3.744645000
H        4.116460000     -5.417363000     -3.205716000
C        0.143812000      4.731849000      0.026755000
C        0.252642000      6.240300000      0.192218000
C       -0.358938000      6.891366000      1.260884000
H       -0.932575000      6.323288000      1.977956000
C       -0.249653000      8.265064000      1.404565000
H       -0.735311000      8.757531000      2.237136000
C        0.477955000      9.005444000      0.485233000
H        0.564932000     10.078928000      0.598975000
C        1.094869000      8.366225000     -0.579370000
H        1.668448000      8.936965000     -1.298273000
C        0.981020000      6.993274000     -0.725561000
H        1.472532000      6.499899000     -1.550880000
C        0.755365000      4.214295000      2.386896000
C       -0.140828000      4.055322000      3.465512000
C        0.288807000      4.355162000      4.753302000
H       -0.397068000      4.239167000      5.580815000
C        1.573803000      4.796594000      4.999092000
H        1.889413000      5.024042000      6.008788000
C        2.455695000      4.935060000      3.945324000
H        3.466009000      5.265589000      4.141771000
C        2.072828000      4.652060000      2.639917000
C       -1.583218000      3.541528000      3.284501000
H       -1.741025000      3.328063000      2.229425000
C       -1.813369000      2.227717000      4.072741000
H       -1.059406000      1.489170000      3.823225000
H       -2.788249000      1.814282000      3.832977000
H       -1.774515000      2.404448000      5.142767000
C       -2.640479000      4.593831000      3.705028000
H       -2.537977000      4.853007000      4.753957000
H       -3.638504000      4.194363000      3.551390000
H       -2.548750000      5.502604000      3.119932000
C        3.129713000      4.784435000      1.526585000
H        2.648336000      4.604920000      0.569780000
C        3.755462000      6.200513000      1.476511000
H        4.341305000      6.401835000      2.367166000
H        2.987012000      6.961915000      1.394996000
H        4.412574000      6.284410000      0.615905000
C        4.237017000      3.714565000      1.692004000
H        4.783912000      3.861277000      2.617989000
H        4.941035000      3.773537000      0.867384000
H        3.805543000      2.718637000      1.703570000
C       -0.555550000      4.808103000     -2.361316000
C       -1.842311000      5.380857000     -2.458929000
C       -2.245400000      5.943533000     -3.664939000
H       -3.230423000      6.382454000     -3.740026000
C       -1.420400000      5.947487000     -4.771414000
H       -1.755819000      6.385747000     -5.702069000
C       -0.162305000      5.385579000     -4.677594000
H        0.484031000      5.388478000     -5.544106000
C        0.290377000      4.820944000     -3.491922000
C       -2.846105000      5.397931000     -1.289154000
H       -2.386236000      4.916164000     -0.430273000
C       -3.219063000      6.844661000     -0.877117000
H       -2.332135000      7.428752000     -0.657666000
H       -3.846681000      6.828833000      0.009058000
H       -3.767253000      7.343926000     -1.669337000
C       -4.131546000      4.604431000     -1.633018000
H       -4.671162000      5.071756000     -2.450187000
H       -4.788484000      4.571625000     -0.769060000
H       -3.892725000      3.585842000     -1.919200000
C        1.708144000      4.218575000     -3.467210000
H        1.926689000      3.915740000     -2.447512000
C        1.798924000      2.962708000     -4.368819000
H        1.646344000      3.223563000     -5.411393000
H        1.047716000      2.230969000     -4.091090000
H        2.777644000      2.501855000     -4.273514000
C        2.794139000      5.240964000     -3.889124000
H        3.779380000      4.799948000     -3.769215000
H        2.749961000      6.139239000     -3.282367000
H        2.679838000      5.529768000     -4.928681000
252
AN
Y        1.911598000     -0.272577000      0.269901000
Y       -0.903502000      1.724753000      0.011197000
Y       -1.185326000     -1.532558000      0.095757000
N        4.325330000     -0.415578000      0.393573000
N        3.517449000     -0.181142000     -1.709450000
N       -1.449803000      3.817817000      1.086758000
N       -2.227452000      3.534609000     -1.018550000
N       -2.702908000     -3.103853000      1.119462000
N       -2.331878000     -3.366731000     -1.114331000
C       -0.319945000     -0.002091000      1.629729000
H       -1.006996000     -0.594454000      2.293527000
H        0.147812000      0.720058000      2.333187000
C        0.103141000     -0.018961000     -1.717923000
H       -0.282190000      0.881208000     -2.248038000
H        1.115451000     -0.127825000     -2.148901000
H       -0.464013000     -0.836185000     -2.207737000
C       -2.857787000      0.273914000     -0.577251000
H       -3.496864000     -0.628686000     -0.592143000
H       -3.400437000      0.958799000      0.105217000
H       -2.965752000      0.705434000     -1.589689000
C        1.085743000     -2.644431000     -0.199763000
H        0.783373000     -3.418529000      0.535624000
H        0.687181000     -2.983951000     -1.172567000
H        2.179280000     -2.793741000     -0.310618000
C        1.554587000      2.247871000      0.247914000
H        1.485323000      2.657823000      1.272825000
H        1.229701000      3.074927000     -0.416200000
H        2.636820000      2.190333000      0.022706000
C        4.619068000     -0.286759000     -0.927418000
C        6.051620000     -0.246323000     -1.450039000
C        7.000644000      0.570545000     -0.839293000
H        6.714402000      1.193812000     -0.005737000
C        8.305236000      0.608333000     -1.304039000
H        9.028360000      1.252337000     -0.820430000
C        8.681636000     -0.172674000     -2.385958000
H        9.701701000     -0.144744000     -2.748450000
C        7.745028000     -0.987031000     -3.003280000
H        8.029751000     -1.599778000     -3.848873000
C        6.439575000     -1.021039000     -2.539924000
H        5.718882000     -1.661260000     -3.024700000
C        5.302005000     -0.723592000      1.415986000
C        5.652364000      0.263430000      2.362509000
C        6.506024000     -0.068003000      3.406742000
H        6.766396000      0.681425000      4.140812000
C        7.040627000     -1.337546000      3.520476000
H        7.708967000     -1.576498000      4.337122000
C        6.721041000     -2.295567000      2.579147000
H        7.147571000     -3.285231000      2.666857000
C        5.856775000     -2.015998000      1.526220000
C        5.125807000      1.708098000      2.254684000
H        4.717074000      1.837736000      1.255938000
C        3.986349000      1.978291000      3.265233000
H        3.151258000      1.306039000      3.092191000
H        3.629111000      2.998976000      3.166978000
H        4.328867000      1.831347000      4.284829000
C        6.245255000      2.765068000      2.434449000
H        5.861040000      3.749726000      2.184946000
H        7.092589000      2.557391000      1.788962000
H        6.599898000      2.795366000      3.459182000
C        5.543068000     -3.142125000      0.520748000
H        4.896880000     -2.740787000     -0.255073000
C        6.828776000     -3.670268000     -0.164477000
H        7.470569000     -4.176576000      0.549006000
H        7.391319000     -2.857918000     -0.611639000
H        6.569359000     -4.378140000     -0.946192000
C        4.785647000     -4.318398000      1.185587000
H        5.377603000     -4.770300000      1.975161000
H        4.564191000     -5.083402000      0.447262000
H        3.846573000     -3.984383000      1.613912000
C        3.595970000      0.103816000     -3.131622000
C        3.222404000     -0.883965000     -4.068780000
C        3.265473000     -0.587518000     -5.426419000
H        2.986162000     -1.347424000     -6.142606000
C        3.656003000      0.655669000     -5.881075000
H        3.681509000      0.867715000     -6.941757000
C        4.007458000      1.627768000     -4.965933000
H        4.302792000      2.604959000     -5.321231000
C        3.988598000      1.377706000     -3.599160000
C        2.741316000     -2.289244000     -3.656040000
H        2.701666000     -2.327286000     -2.571717000
C        1.317355000     -2.569862000     -4.198956000
H        0.640198000     -1.764056000     -3.940862000
H        0.930201000     -3.492801000     -3.778390000
H        1.325532000     -2.672031000     -5.279040000
C        3.698294000     -3.412789000     -4.130046000
H        3.808231000     -3.402943000     -5.209767000
H        3.299603000     -4.380608000     -3.840293000
H        4.682952000     -3.311996000     -3.687433000
C        4.365707000      2.534926000     -2.653834000
H        4.373775000      2.160370000     -1.634861000
C        5.773191000      3.106975000     -2.957753000
H        6.520593000      2.321406000     -2.966222000
H        6.048903000      3.833499000     -2.199028000
H        5.792516000      3.604972000     -3.921334000
C        3.312161000      3.667225000     -2.724057000
H        3.305175000      4.128314000     -3.706436000
H        3.535704000      4.435048000     -1.989418000
H        2.320199000      3.277654000     -2.522502000
C       -2.139874000      4.366860000      0.049745000
C       -2.737018000      5.766535000      0.083292000
C       -3.424539000      6.221394000      1.206286000
H       -3.545411000      5.572145000      2.060461000
C       -3.967286000      7.495968000      1.233806000
H       -4.502894000      7.831878000      2.112333000
C       -3.826040000      8.336317000      0.140191000
H       -4.248730000      9.333136000      0.162199000
C       -3.140758000      7.895294000     -0.981707000
H       -3.023059000      8.546677000     -1.838072000
C       -2.602119000      6.619319000     -1.010482000
H       -2.063877000      6.287327000     -1.885860000
C       -1.103985000      4.487630000      2.321623000
C       -1.697482000      4.051064000      3.527273000
C       -1.315956000      4.640462000      4.726284000
H       -1.772670000      4.309560000      5.648585000
C       -0.367604000      5.643777000      4.765050000
H       -0.083811000      6.091616000      5.708218000
C        0.215241000      6.068848000      3.588089000
H        0.959497000      6.852221000      3.620893000
C       -0.131796000      5.511017000      2.362869000
C       -2.760629000      2.935260000      3.573438000
H       -2.911778000      2.565346000      2.561653000
C       -4.129397000      3.450437000      4.086703000
H       -4.048685000      3.832780000      5.099330000
H       -4.851260000      2.639036000      4.087807000
H       -4.515627000      4.242548000      3.454259000
C       -2.291812000      1.744439000      4.445201000
H       -2.214401000      2.030795000      5.489203000
H       -1.322605000      1.386871000      4.116216000
H       -3.001149000      0.925694000      4.370277000
C        0.581104000      6.040415000      1.102482000
H        0.197112000      5.505105000      0.237747000
C        0.309924000      7.550915000      0.884965000
H       -0.753925000      7.759852000      0.875779000
H        0.730183000      7.871439000     -0.063753000
H        0.765393000      8.142854000      1.672114000
C        2.108924000      5.790654000      1.162198000
H        2.560989000      6.335099000      1.984759000
H        2.574712000      6.124300000      0.239730000
H        2.324428000      4.735665000      1.290593000
C       -3.011127000      3.790485000     -2.206942000
C       -4.423151000      3.797111000     -2.172898000
C       -5.131707000      4.001308000     -3.350917000
H       -6.212336000      4.007564000     -3.323709000
C       -4.487334000      4.190608000     -4.557067000
H       -5.057198000      4.350577000     -5.462727000
C       -3.107681000      4.161877000     -4.595890000
H       -2.602894000      4.299593000     -5.541815000
C       -2.354831000      3.961059000     -3.445169000
C       -5.230312000      3.543931000     -0.884896000
H       -4.535304000      3.422303000     -0.058011000
C       -6.170922000      4.727714000     -0.545658000
H       -5.623289000      5.662688000     -0.504778000
H       -6.640727000      4.563755000      0.419658000
H       -6.955341000      4.825731000     -1.288849000
C       -6.052755000      2.235837000     -0.996333000
H       -6.787317000      2.305027000     -1.792025000
H       -6.579626000      2.048293000     -0.065774000
H       -5.404622000      1.390018000     -1.201395000
C       -0.821292000      3.917853000     -3.586832000
H       -0.393181000      3.710737000     -2.607812000
C       -0.383022000      2.784131000     -4.548138000
H       -0.836477000      1.839987000     -4.264595000
H        0.696025000      2.666763000     -4.524937000
H       -0.676565000      3.005782000     -5.568956000
C       -0.238848000      5.271296000     -4.066485000
H       -0.638193000      5.545272000     -5.037777000
H        0.841089000      5.200550000     -4.152167000
H       -0.469358000      6.067700000     -3.366836000
C       -3.015534000     -3.784274000     -0.019067000
C       -4.082888000     -4.869567000     -0.069536000
C       -4.079494000     -5.939199000      0.821479000
H       -3.293634000     -6.022839000      1.556786000
C       -5.069508000     -6.907004000      0.763142000
H       -5.050413000     -7.736146000      1.458675000
C       -6.079765000     -6.813848000     -0.181885000
H       -6.854412000     -7.569344000     -0.225501000
C       -6.095792000     -5.748441000     -1.069029000
H       -6.884550000     -5.665441000     -1.805663000
C       -5.102702000     -4.783984000     -1.013395000
H       -5.126072000     -3.948081000     -1.696560000
C       -3.353750000     -3.338995000      2.396061000
C       -2.656333000     -4.019738000      3.416598000
C       -3.259051000     -4.193285000      4.656303000
H       -2.723572000     -4.711595000      5.439381000
C       -4.529439000     -3.714248000      4.909879000
H       -4.983886000     -3.858650000      5.881234000
C       -5.209636000     -3.041069000      3.914930000
H       -6.198282000     -2.654595000      4.119238000
C       -4.646368000     -2.842942000      2.659310000
C       -1.222300000     -4.547149000      3.223356000
H       -0.938817000     -4.385342000      2.186143000
C       -0.234569000     -3.758988000      4.117817000
H       -0.335681000     -2.691359000      3.952112000
H        0.788675000     -4.050161000      3.900165000
H       -0.423862000     -3.953328000      5.168594000
C       -1.088560000     -6.063590000      3.511583000
H       -1.317130000     -6.288110000      4.548196000
H       -0.070456000     -6.386208000      3.314032000
H       -1.753603000     -6.646875000      2.884094000
C       -5.445510000     -2.034782000      1.621104000
H       -4.907818000     -2.060524000      0.678061000
C       -6.854471000     -2.626070000      1.369158000
H       -7.480757000     -2.541426000      2.250952000
H       -6.791088000     -3.673960000      1.094839000
H       -7.340103000     -2.089629000      0.559315000
C       -5.550202000     -0.552833000      2.056971000
H       -6.099751000     -0.460440000      2.988472000
H       -6.065887000      0.025814000      1.297546000
H       -4.561301000     -0.127332000      2.199692000
C       -2.305996000     -4.083457000     -2.376295000
C       -1.609116000     -5.307075000     -2.495466000
C       -1.516028000     -5.918820000     -3.740075000
H       -0.982054000     -6.854299000     -3.830818000
C       -2.082966000     -5.355096000     -4.865383000
H       -1.994223000     -5.844444000     -5.826285000
C       -2.764468000     -4.160152000     -4.750358000
H       -3.208777000     -3.718712000     -5.631327000
C       -2.893821000     -3.514155000     -3.526548000
C       -0.921066000     -6.004133000     -1.304302000
H       -1.089487000     -5.410320000     -0.409980000
C       -1.508710000     -7.416290000     -1.053316000
H       -2.586718000     -7.376297000     -0.943030000
H       -1.086751000     -7.839402000     -0.146443000
H       -1.276215000     -8.084441000     -1.875953000
C        0.611259000     -6.108177000     -1.508637000
H        0.848927000     -6.730994000     -2.364794000
H        1.072738000     -6.550502000     -0.630667000
H        1.049509000     -5.128929000     -1.666409000
C       -3.673867000     -2.185743000     -3.489600000
H       -3.775424000     -1.882714000     -2.451706000
C       -2.912907000     -1.066468000     -4.242114000
H       -2.822294000     -1.304132000     -5.297384000
H       -1.915384000     -0.936360000     -3.838125000
H       -3.445194000     -0.124315000     -4.150237000
C       -5.101255000     -2.321342000     -4.080209000
H       -5.654750000     -1.401553000     -3.915411000
H       -5.649542000     -3.134972000     -3.617626000
H       -5.067152000     -2.504449000     -5.148992000
C        2.172508000     -0.233299000      6.108672000
C        1.785835000     -0.456991000      4.782712000
C        2.503790000     -1.362256000      3.978667000
C        3.601372000     -2.045667000      4.529896000
C        3.982713000     -1.813981000      5.857459000
C        3.273831000     -0.906398000      6.655313000
H        1.602536000      0.468319000      6.716649000
H        0.923355000      0.061197000      4.368200000
H        4.157611000     -2.756698000      3.920671000
H        4.836299000     -2.353150000      6.266709000
H        3.570588000     -0.731138000      7.688073000
N        2.111107000     -1.583700000      2.615305000
H        2.379591000     -2.520000000      2.307616000
H        1.086203000     -1.475202000      2.502454000
252
TS1N, Imaginary frequency = i1279.64 cm-1
Y        1.966437000      0.332264000      0.270347000
Y       -1.324789000      1.440406000     -0.094674000
Y       -0.756888000     -1.771911000      0.086036000
N        4.353205000      0.622832000      0.508937000
N        3.600501000      0.457069000     -1.616653000
N       -2.463903000      3.349321000      0.834243000
N       -2.973897000      2.796137000     -1.299988000
N       -1.858203000     -3.562147000      1.242373000
N       -1.348099000     -3.923816000     -0.943290000
C       -0.527916000     -0.041353000      1.687399000
H       -1.134028000     -0.802381000      2.245285000
H       -0.643891000      0.858689000      2.325088000
C        0.169747000      0.031832000     -1.730331000
H       -0.410321000      0.789342000     -2.303212000
H        1.190933000      0.166446000     -2.136234000
H       -0.161128000     -0.910878000     -2.210013000
C       -2.793404000     -0.492430000     -0.748695000
H       -3.188643000     -1.525036000     -0.692192000
H       -3.533434000      0.086146000     -0.159840000
H       -2.942034000     -0.190943000     -1.801339000
C        1.719583000     -2.196777000      0.071930000
H        1.609599000     -2.888204000      0.931154000
H        1.446314000     -2.781083000     -0.827973000
H        2.814244000     -2.081443000     -0.042693000
C        0.890711000      2.630530000      0.257059000
H        0.642241000      2.995200000      1.271461000
H        0.373691000      3.327022000     -0.435236000
H        1.951884000      2.915091000      0.108474000
C        4.679828000      0.588228000     -0.800823000
C        6.115447000      0.663230000     -1.306203000
C        6.902450000      1.785246000     -1.068430000
H        6.489662000      2.625889000     -0.531545000
C        8.208020000      1.838227000     -1.530698000
H        8.807880000      2.719756000     -1.343879000
C        8.743388000      0.767196000     -2.229343000
H        9.763947000      0.808475000     -2.588967000
C        7.968268000     -0.358486000     -2.462736000
H        8.381764000     -1.201650000     -3.001162000
C        6.661799000     -0.409001000     -2.004054000
H        6.065160000     -1.293094000     -2.171854000
C        5.302349000      0.643059000      1.605288000
C        5.545871000      1.851207000      2.292302000
C        6.341128000      1.835831000      3.431339000
H        6.516463000      2.756440000      3.969943000
C        6.916541000      0.665874000      3.889020000
H        7.531668000      0.672556000      4.779245000
C        6.712012000     -0.508433000      3.192762000
H        7.177958000     -1.418906000      3.543116000
C        5.915679000     -0.544300000      2.053425000
C        4.964730000      3.196419000      1.814760000
H        4.553177000      3.048469000      0.819343000
C        3.815927000      3.679789000      2.729735000
H        3.018954000      2.945945000      2.764828000
H        3.408382000      4.615071000      2.357957000
H        4.170554000      3.840075000      3.742914000
C        6.048038000      4.301999000      1.717480000
H        5.642040000      5.170498000      1.207213000
H        6.919511000      3.960129000      1.169194000
H        6.373973000      4.616912000      2.703057000
C        5.751732000     -1.890018000      1.320881000
H        5.142080000     -1.726014000      0.436574000
C        7.119176000     -2.446891000      0.849458000
H        7.740576000     -2.720403000      1.695814000
H        7.654026000     -1.711218000      0.258373000
H        6.970034000     -3.333416000      0.240035000
C        5.030376000     -2.944919000      2.194872000
H        5.603666000     -3.169916000      3.088462000
H        4.898615000     -3.866026000      1.634737000
H        4.051457000     -2.591876000      2.500022000
C        3.692835000      0.654670000     -3.055608000
C        3.612685000     -0.436856000     -3.945145000
C        3.616332000     -0.201673000     -5.316399000
H        3.549114000     -1.039118000     -5.996338000
C        3.702476000      1.076207000     -5.828754000
H        3.701958000      1.238399000     -6.898583000
C        3.788565000      2.146556000     -4.960200000
H        3.852692000      3.148234000     -5.361191000
C        3.788145000      1.961961000     -3.583619000
C        3.497157000     -1.898714000     -3.471664000
H        3.593566000     -1.913258000     -2.388733000
C        2.115948000     -2.493391000     -3.842221000
H        1.314531000     -1.882001000     -3.446813000
H        2.016016000     -3.496846000     -3.440269000
H        1.998112000     -2.548755000     -4.919516000
C        4.609049000     -2.801723000     -4.067361000
H        4.456645000     -2.952846000     -5.130779000
H        4.590534000     -3.774945000     -3.585663000
H        5.594392000     -2.371185000     -3.929862000
C        3.855755000      3.215799000     -2.690300000
H        3.947387000      2.897938000     -1.656155000
C        5.083183000      4.102630000     -3.018177000
H        5.998581000      3.520883000     -3.002963000
H        5.170769000      4.899113000     -2.285026000
H        4.986634000      4.558223000     -3.997928000
C        2.555334000      4.047652000     -2.806040000
H        2.435736000      4.439915000     -3.810873000
H        2.580646000      4.884549000     -2.114402000
H        1.689865000      3.436220000     -2.572823000
C       -3.187817000      3.662370000     -0.274819000
C       -4.122671000      4.859882000     -0.361460000
C       -4.981189000      5.173602000      0.690071000
H       -4.993645000      4.556398000      1.575815000
C       -5.830577000      6.265138000      0.606630000
H       -6.494905000      6.491532000      1.430602000
C       -5.830126000      7.062568000     -0.527524000
H       -6.492787000      7.916738000     -0.592038000
C       -4.976769000      6.762399000     -1.578471000
H       -4.967267000      7.382374000     -2.465628000
C       -4.131068000      5.668353000     -1.496564000
H       -3.465148000      5.447316000     -2.317350000
C       -2.403831000      4.128429000      2.052771000
C       -2.947428000      3.587205000      3.239244000
C       -2.843168000      4.306607000      4.423727000
H       -3.266188000      3.898125000      5.330771000
C       -2.212263000      5.534322000      4.467229000
H       -2.140945000      6.079297000      5.399249000
C       -1.669862000      6.057511000      3.310539000
H       -1.169949000      7.015262000      3.348315000
C       -1.751029000      5.379743000      2.099572000
C       -3.660883000      2.220465000      3.283726000
H       -3.570197000      1.753994000      2.304788000
C       -5.174443000      2.362356000      3.586226000
H       -5.336457000      2.848649000      4.543139000
H       -5.636984000      1.380462000      3.622052000
H       -5.677228000      2.942055000      2.819638000
C       -3.010699000      1.270002000      4.320287000
H       -3.189982000      1.615047000      5.333293000
H       -1.938801000      1.203418000      4.169410000
H       -3.431818000      0.273789000      4.224173000
C       -1.101109000      6.033657000      0.863703000
H       -1.262032000      5.386799000      0.005047000
C       -1.733473000      7.412145000      0.544188000
H       -2.810977000      7.336430000      0.450992000
H       -1.334887000      7.796041000     -0.390243000
H       -1.509942000      8.130817000      1.325763000
C        0.429306000      6.193528000      1.044434000
H        0.655995000      6.873500000      1.859046000
H        0.869704000      6.594668000      0.136419000
H        0.896146000      5.238215000      1.257273000
C       -3.708488000      2.793110000     -2.547029000
C       -5.075574000      2.440351000     -2.596337000
C       -5.728411000      2.415873000     -3.822966000
H       -6.774862000      2.147430000     -3.859693000
C       -5.070171000      2.722039000     -4.997178000
H       -5.597501000      2.701219000     -5.941686000
C       -3.728316000      3.042688000     -4.953425000
H       -3.209943000      3.271531000     -5.873936000
C       -3.030371000      3.078586000     -3.751990000
C       -5.883165000      2.034782000     -1.347879000
H       -5.242230000      2.124419000     -0.474529000
C       -7.115197000      2.948919000     -1.129382000
H       -6.827632000      3.994100000     -1.106599000
H       -7.595266000      2.705261000     -0.186217000
H       -7.843871000      2.814314000     -1.921912000
C       -6.338178000      0.556705000     -1.440434000
H       -7.009184000      0.408667000     -2.280250000
H       -6.863959000      0.273004000     -0.533941000
H       -5.485065000     -0.102347000     -1.563911000
C       -1.527905000      3.416761000     -3.805781000
H       -1.121573000      3.336713000     -2.799272000
C       -0.764583000      2.414711000     -4.708958000
H       -0.993398000      1.390886000     -4.431621000
H        0.306507000      2.563897000     -4.614930000
H       -1.033076000      2.549419000     -5.751515000
C       -1.269196000      4.865699000     -4.290319000
H       -1.671244000      5.021098000     -5.286453000
H       -0.201572000      5.060714000     -4.321414000
H       -1.723786000      5.589787000     -3.622567000
C       -1.939913000     -4.407793000      0.180033000
C       -2.674448000     -5.738767000      0.228436000
C       -2.448013000     -6.657194000      1.250066000
H       -1.719744000     -6.438944000      2.016773000
C       -3.139255000     -7.857748000      1.282241000
H       -2.948725000     -8.565093000      2.079096000
C       -4.070609000     -8.151586000      0.297953000
H       -4.612313000     -9.088966000      0.325143000
C       -4.307513000     -7.240369000     -0.720103000
H       -5.037149000     -7.460719000     -1.488676000
C       -3.612166000     -6.042688000     -0.755116000
H       -3.808448000     -5.329732000     -1.542331000
C       -2.466390000     -3.808285000      2.536895000
C       -1.644616000     -4.146858000      3.632951000
C       -2.216884000     -4.302591000      4.889204000
H       -1.588296000     -4.555254000      5.731601000
C       -3.574985000     -4.140575000      5.084322000
H       -4.003587000     -4.266149000      6.069977000
C       -4.379205000     -3.812620000      4.011407000
H       -5.440534000     -3.679079000      4.167476000
C       -3.850845000     -3.641633000      2.736563000
C       -0.121245000     -4.329404000      3.494709000
H        0.132532000     -4.265318000      2.439373000
C        0.637914000     -3.203212000      4.237642000
H        0.322426000     -2.226675000      3.885250000
H        1.706820000     -3.300882000      4.073988000
H        0.453632000     -3.251788000      5.306061000
C        0.364299000     -5.710069000      4.004393000
H        0.199916000     -5.815049000      5.071675000
H        1.428607000     -5.816657000      3.816218000
H       -0.149974000     -6.521982000      3.501283000
C       -4.805229000     -3.231128000      1.600552000
H       -4.244393000     -3.210944000      0.670672000
C       -5.968381000     -4.237903000      1.420706000
H       -6.622325000     -4.241117000      2.286408000
H       -5.590027000     -5.244411000      1.275368000
H       -6.561167000     -3.966823000      0.552025000
C       -5.357215000     -1.804950000      1.841233000
H       -5.954430000     -1.767126000      2.746711000
H       -5.981844000     -1.499796000      1.007901000
H       -4.543071000     -1.093117000      1.938820000
C       -1.071529000     -4.717163000     -2.125840000
C       -0.081521000     -5.725251000     -2.103882000
C        0.228367000     -6.398328000     -3.279811000
H        0.986233000     -7.169010000     -3.263930000
C       -0.403419000     -6.099465000     -4.470485000
H       -0.143212000     -6.631508000     -5.375995000
C       -1.370118000     -5.114165000     -4.492872000
H       -1.864322000     -4.879870000     -5.425255000
C       -1.722716000     -4.419539000     -3.341872000
C        0.698126000     -6.112895000     -0.830940000
H        0.335504000     -5.509251000     -0.003415000
C        0.481011000     -7.602107000     -0.460362000
H       -0.575422000     -7.835154000     -0.385248000
H        0.948810000     -7.819586000      0.495314000
H        0.920757000     -8.255372000     -1.206747000
C        2.213993000     -5.828709000     -0.978775000
H        2.649767000     -6.435591000     -1.765691000
H        2.726291000     -6.060706000     -0.049737000
H        2.392662000     -4.785211000     -1.213996000
C       -2.811724000     -3.335359000     -3.453127000
H       -3.039779000     -2.982191000     -2.451733000
C       -2.314891000     -2.126809000     -4.284254000
H       -2.117741000     -2.419359000     -5.310831000
H       -1.399587000     -1.720162000     -3.868070000
H       -3.065758000     -1.342238000     -4.292256000
C       -4.127898000     -3.878808000     -4.066104000
H       -4.898204000     -3.114816000     -4.016317000
H       -4.483265000     -4.754002000     -3.532563000
H       -3.992955000     -4.151244000     -5.107534000
C        1.575528000      2.128905000      5.546515000
C        1.456252000      1.556380000      4.274932000
C        2.179978000      0.390213000      3.934402000
C        3.024145000     -0.172816000      4.920716000
C        3.143643000      0.409673000      6.186053000
C        2.418988000      1.565381000      6.513546000
H        1.001700000      3.026563000      5.778133000
H        0.799758000      2.015930000      3.538205000
H        3.592074000     -1.073531000      4.682990000
H        3.807175000     -0.046473000      6.920977000
H        2.510813000      2.016494000      7.500361000
N        2.033284000     -0.207902000      2.662923000
H        2.452866000     -1.141957000      2.681309000
H        0.803084000     -0.298115000      2.298428000
252
BN
Y       -2.077331000     -0.314992000      0.468899000
Y        1.284748000     -1.468270000     -0.072374000
Y        0.767007000      1.790512000      0.034001000
N       -4.473467000     -0.543815000      0.606615000
N       -3.708567000     -0.370867000     -1.512773000
N        2.459870000     -3.383345000      0.794828000
N        2.804265000     -2.837655000     -1.375136000
N        1.953702000      3.524884000      1.188253000
N        1.427370000      3.872597000     -0.990969000
C        0.900630000      0.099286000      1.879999000
H        1.677455000      0.824545000      2.215850000
H        1.209456000     -0.830003000      2.395704000
C       -0.237118000     -0.056133000     -1.615939000
H        0.252701000     -0.857301000     -2.215585000
H       -1.298879000     -0.160771000     -1.911487000
H        0.079968000      0.848583000     -2.175246000
C        2.773017000      0.436207000     -0.737393000
H        3.195321000      1.458191000     -0.689153000
H        3.506074000     -0.155078000     -0.152017000
H        2.902139000      0.122419000     -1.788213000
C       -1.663299000      2.205414000      0.202615000
H       -1.500260000      2.917893000      1.033418000
H       -1.450949000      2.762941000     -0.734361000
H       -2.764854000      2.101613000      0.164098000
C       -0.879744000     -2.584728000      0.461548000
H       -0.432902000     -2.962665000      1.400016000
H       -0.520392000     -3.272970000     -0.333814000
H       -1.945932000     -2.872502000      0.552328000
C       -4.791456000     -0.490795000     -0.705567000
C       -6.227969000     -0.542562000     -1.211812000
C       -7.036871000     -1.645504000     -0.958880000
H       -6.638004000     -2.486417000     -0.411806000
C       -8.344584000     -1.677974000     -1.416721000
H       -8.961549000     -2.544958000     -1.217935000
C       -8.860701000     -0.604143000     -2.125589000
H       -9.883054000     -0.628858000     -2.481503000
C       -8.064137000      0.503264000     -2.373454000
H       -8.462792000      1.348614000     -2.919578000
C       -6.755326000      0.532637000     -1.919535000
H       -6.141621000      1.402713000     -2.098711000
C       -5.430145000     -0.554893000      1.694381000
C       -5.678366000     -1.753218000      2.397717000
C       -6.506519000     -1.725472000      3.512973000
H       -6.690857000     -2.639198000      4.060335000
C       -7.098817000     -0.552173000      3.939993000
H       -7.739082000     -0.550581000      4.812336000
C       -6.866995000      0.617235000      3.244313000
H       -7.331115000      1.533887000      3.580521000
C       -6.041300000      0.639809000      2.125859000
C       -5.051427000     -3.097903000      1.980927000
H       -4.562251000     -2.955200000      1.020082000
C       -3.979181000     -3.562116000      2.996354000
H       -3.205276000     -2.812311000      3.111675000
H       -3.519154000     -4.485147000      2.656321000
H       -4.424837000     -3.743060000      3.969300000
C       -6.114161000     -4.214843000      1.810324000
H       -5.656005000     -5.093689000      1.366226000
H       -6.931527000     -3.897647000      1.171757000
H       -6.531454000     -4.504862000      2.768833000
C       -5.811787000      1.986945000      1.413789000
H       -5.209360000      1.806816000      0.527519000
C       -7.143553000      2.627421000      0.948410000
H       -7.753833000      2.920528000      1.796208000
H       -7.714982000      1.933350000      0.341123000
H       -6.941982000      3.515037000      0.355852000
C       -5.031544000      2.978468000      2.312518000
H       -5.594303000      3.215638000      3.209729000
H       -4.844205000      3.902961000      1.774247000
H       -4.075528000      2.560346000      2.612132000
C       -3.794674000     -0.586837000     -2.946699000
C       -3.679490000      0.488792000     -3.851450000
C       -3.675117000      0.235449000     -5.219383000
H       -3.582283000      1.061710000     -5.910058000
C       -3.785890000     -1.047137000     -5.714876000
H       -3.778770000     -1.224475000     -6.782204000
C       -3.905635000     -2.103056000     -4.832174000
H       -3.989158000     -3.108445000     -5.220282000
C       -3.915638000     -1.899250000     -3.458624000
C       -3.534058000      1.952260000     -3.392289000
H       -3.628784000      1.977324000     -2.308987000
C       -2.141437000      2.515070000     -3.769991000
H       -1.352623000      1.888024000     -3.373336000
H       -2.018022000      3.518689000     -3.375044000
H       -2.024240000      2.561183000     -4.847751000
C       -4.627512000      2.872282000     -3.995524000
H       -4.478275000      3.002375000     -5.062229000
H       -4.583509000      3.852410000     -3.529675000
H       -5.621618000      2.467122000     -3.845100000
C       -4.022264000     -3.137066000     -2.546399000
H       -4.124912000     -2.800759000     -1.519126000
C       -5.260186000     -4.006641000     -2.880477000
H       -6.164375000     -3.407517000     -2.891253000
H       -5.375574000     -4.788101000     -2.135116000
H       -5.155574000     -4.481302000     -3.850329000
C       -2.736334000     -3.995302000     -2.624027000
H       -2.605750000     -4.407473000     -3.619468000
H       -2.789973000     -4.819212000     -1.918524000
H       -1.863605000     -3.396170000     -2.385449000
C        3.083721000     -3.711561000     -0.366766000
C        3.970661000     -4.934699000     -0.537092000
C        4.885623000     -5.303909000      0.446873000
H        4.981473000     -4.709833000      1.343089000
C        5.685650000     -6.423145000      0.282435000
H        6.395055000     -6.692600000      1.054216000
C        5.578266000     -7.193595000     -0.865293000
H        6.202353000     -8.069580000     -0.992583000
C        4.667163000     -6.838898000     -1.848681000
H        4.573449000     -7.437795000     -2.745364000
C        3.871193000     -5.717075000     -1.686126000
H        3.158779000     -5.453295000     -2.453269000
C        2.472955000     -4.172617000      2.010343000
C        3.132637000     -3.662294000      3.150230000
C        3.112951000     -4.396960000      4.329817000
H        3.626396000     -4.014977000      5.200909000
C        2.451655000     -5.606533000      4.413439000
H        2.446876000     -6.163270000      5.341295000
C        1.790836000     -6.095133000      3.304191000
H        1.265106000     -7.037019000      3.375297000
C        1.785528000     -5.402312000      2.098882000
C        3.883843000     -2.314759000      3.150777000
H        3.692728000     -1.814153000      2.203426000
C        5.418145000     -2.501847000      3.267049000
H        5.676097000     -3.039501000      4.174172000
H        5.907021000     -1.532573000      3.296257000
H        5.813875000     -3.051266000      2.419747000
C        3.387559000     -1.382931000      4.285629000
H        3.696920000     -1.753116000      5.257287000
H        2.305821000     -1.302776000      4.283209000
H        3.805117000     -0.388949000      4.156940000
C        1.004049000     -6.015763000      0.919621000
H        1.105279000     -5.360381000      0.058096000
C        1.559643000     -7.407371000      0.523518000
H        2.624973000     -7.362768000      0.327347000
H        1.060870000     -7.764549000     -0.372597000
H        1.389881000     -8.130850000      1.314112000
C       -0.507258000     -6.131744000      1.241208000
H       -0.678623000     -6.825243000      2.057861000
H       -1.044072000     -6.495467000      0.370089000
H       -0.920132000     -5.168433000      1.519904000
C        3.481310000     -2.811393000     -2.655995000
C        4.849970000     -2.473214000     -2.757524000
C        5.446990000     -2.422852000     -4.011464000
H        6.494152000     -2.166098000     -4.088173000
C        4.733088000     -2.688547000     -5.162719000
H        5.217687000     -2.647068000     -6.129213000
C        3.391398000     -2.997078000     -5.066658000
H        2.829748000     -3.196078000     -5.968467000
C        2.747271000     -3.059402000     -3.836301000
C        5.724709000     -2.116132000     -1.539224000
H        5.125533000     -2.213466000     -0.637657000
C        6.944100000     -3.062973000     -1.403633000
H        6.633968000     -4.101808000     -1.394471000
H        7.473863000     -2.855386000     -0.478632000
H        7.637103000     -2.922703000     -2.226547000
C        6.212173000     -0.647355000     -1.615754000
H        6.852477000     -0.494840000     -2.478334000
H        6.781093000     -0.399248000     -0.724963000
H        5.372437000      0.035689000     -1.688453000
C        1.241191000     -3.386556000     -3.836114000
H        0.877718000     -3.337600000     -2.811469000
C        0.448078000     -2.352453000     -4.675596000
H        0.701063000     -1.338528000     -4.383635000
H       -0.619113000     -2.493111000     -4.535854000
H        0.666568000     -2.462393000     -5.732589000
C        0.951831000     -4.817098000     -4.357089000
H        1.310526000     -4.941200000     -5.373880000
H       -0.117579000     -5.003883000     -4.349923000
H        1.427917000     -5.566651000     -3.734090000
C        2.044209000      4.359332000      0.121522000
C        2.800729000      5.676040000      0.146200000
C        2.610481000      6.601487000      1.169113000
H        1.894843000      6.398118000      1.952057000
C        3.321527000      7.790781000      1.180918000
H        3.159740000      8.504479000      1.978485000
C        4.236027000      8.065230000      0.175271000
H        4.793360000      8.993811000      0.186827000
C        4.436147000      7.146683000     -0.844308000
H        5.152342000      7.352604000     -1.629347000
C        3.720933000      5.960429000     -0.859656000
H        3.888197000      5.241598000     -1.648491000
C        2.571439000      3.761013000      2.481079000
C        1.757828000      4.116171000      3.577430000
C        2.334946000      4.248185000      4.834205000
H        1.713543000      4.510210000      5.679057000
C        3.689040000      4.050542000      5.026522000
H        4.121094000      4.157782000      6.012913000
C        4.485346000      3.713371000      3.950541000
H        5.543756000      3.556078000      4.104304000
C        3.951721000      3.562651000      2.675227000
C        0.240859000      4.346387000      3.436770000
H       -0.007142000      4.323321000      2.378416000
C       -0.558090000      3.221872000      4.139913000
H       -0.269124000      2.246169000      3.763549000
H       -1.621946000      3.353164000      3.967630000
H       -0.382582000      3.235323000      5.210865000
C       -0.203888000      5.727266000      3.981851000
H       -0.055136000      5.793378000      5.054450000
H       -1.260380000      5.876967000      3.779766000
H        0.347863000      6.535368000      3.512875000
C        4.896291000      3.146109000      1.532949000
H        4.329959000      3.131069000      0.606127000
C        6.063567000      4.147387000      1.348555000
H        6.719212000      4.148366000      2.212990000
H        5.689143000      5.155400000      1.203467000
H        6.653068000      3.873010000      0.478663000
C        5.443432000      1.716768000      1.766302000
H        6.049404000      1.674420000      2.665651000
H        6.058509000      1.409504000      0.926453000
H        4.627272000      1.008489000      1.871459000
C        1.144600000      4.651883000     -2.182304000
C        0.176666000      5.680885000     -2.158955000
C       -0.140175000      6.339220000     -3.341383000
H       -0.881298000      7.126036000     -3.326270000
C        0.463542000      6.005288000     -4.537555000
H        0.197346000      6.526153000     -5.447902000
C        1.410103000      5.000640000     -4.559807000
H        1.882611000      4.740191000     -5.496465000
C        1.769638000      4.319790000     -3.402536000
C       -0.568492000      6.109871000     -0.878498000
H       -0.202710000      5.514968000     -0.046042000
C       -0.309715000      7.600473000     -0.541868000
H        0.753156000      7.810246000     -0.492635000
H       -0.752680000      7.846607000      0.418646000
H       -0.749856000      8.249263000     -1.291901000
C       -2.092901000      5.857045000     -0.989616000
H       -2.531340000      6.456995000     -1.780328000
H       -2.580190000      6.119748000     -0.055366000
H       -2.299894000      4.813206000     -1.198813000
C        2.837194000      3.214195000     -3.510964000
H        3.083043000      2.882088000     -2.506463000
C        2.300139000      1.994199000     -4.299155000
H        2.079752000      2.265213000     -5.326889000
H        1.389469000      1.612685000     -3.849389000
H        3.037939000      1.197301000     -4.307974000
C        4.148261000      3.720189000     -4.165153000
H        4.906660000      2.944503000     -4.113566000
H        4.529039000      4.601283000     -3.659363000
H        3.995422000      3.970620000     -5.209590000
C       -0.664736000     -1.813404000      5.568673000
C       -1.025583000     -1.474694000      4.261081000
C       -2.003510000     -0.479100000      3.995379000
C       -2.604473000      0.140207000      5.127135000
C       -2.240497000     -0.204985000      6.430631000
C       -1.261390000     -1.182262000      6.670245000
H        0.084045000     -2.591243000      5.726849000
H       -0.573195000     -2.000242000      3.421611000
H       -3.369126000      0.902800000      4.962631000
H       -2.728036000      0.295347000      7.268507000
H       -0.979413000     -1.451110000      7.687302000
N       -2.365930000     -0.146138000      2.693553000
H       -3.219297000      0.424208000      2.749329000
H       -0.020591000      0.376261000      2.423513000
252
TS2N, Imaginary frequency = i27.05 cm-1
Y        1.978103000      0.608032000      0.267983000
Y       -1.493952000      1.246147000      0.219035000
Y       -0.635487000     -1.826100000      0.346189000
N        4.245396000      0.992508000      0.988481000
N        3.913928000      0.840827000     -1.251105000
N       -2.925932000      3.158098000      0.648969000
N       -2.841213000      2.386226000     -1.482202000
N       -1.602655000     -3.859536000      1.197566000
N       -0.800600000     -3.940797000     -0.918038000
C       -2.054347000     -0.495427000      1.995843000
H       -3.022551000      0.039473000      1.956586000
H       -1.608932000     -0.251766000      2.971331000
C        0.133660000     -0.048120000     -1.468052000
H       -0.581928000      0.597225000     -2.010879000
H        1.108355000      0.244789000     -1.922398000
H       -0.039338000     -1.047054000     -1.919911000
C       -2.641392000     -0.796594000     -0.818473000
H       -2.968704000     -1.838468000     -0.619639000
H       -3.498917000     -0.205636000     -0.445194000
H       -2.629953000     -0.679554000     -1.911254000
C        1.880876000     -1.966443000      0.346892000
H        1.806284000     -2.661076000      1.209496000
H        1.681161000     -2.580307000     -0.552871000
H        2.968635000     -1.776634000      0.281103000
C        0.661708000      2.677552000     -0.115012000
H        1.325693000      3.175892000      0.619567000
H       -0.148929000      3.413273000     -0.264500000
H        1.201106000      2.696146000     -1.085151000
C        4.815688000      0.972537000     -0.240235000
C        6.320415000      1.033547000     -0.460857000
C        7.092427000      2.052925000      0.088227000
H        6.618244000      2.833333000      0.663990000
C        8.463491000      2.082126000     -0.111616000
H        9.050979000      2.884410000      0.316031000
C        9.079930000      1.087713000     -0.855462000
H       10.151662000      1.109584000     -1.009178000
C        8.319718000      0.063489000     -1.399376000
H        8.795050000     -0.719755000     -1.975804000
C        6.948430000      0.038323000     -1.204133000
H        6.360028000     -0.767618000     -1.616605000
C        4.979043000      1.056390000      2.237922000
C        5.015434000      2.269233000      2.958655000
C        5.635562000      2.301540000      4.201128000
H        5.656611000      3.226194000      4.760659000
C        6.226822000      1.173765000      4.738301000
H        6.705238000      1.218108000      5.707886000
C        6.200665000     -0.009475000      4.028142000
H        6.661089000     -0.891224000      4.451528000
C        5.586281000     -0.091193000      2.783326000
C        4.367354000      3.560973000      2.424121000
H        4.063075000      3.384083000      1.394841000
C        3.102113000      3.921478000      3.238748000
H        2.390237000      3.103682000      3.227407000
H        2.623365000      4.800898000      2.818946000
H        3.357329000      4.134112000      4.272037000
C        5.343707000      4.765109000      2.423414000
H        4.876625000      5.614374000      1.933476000
H        6.263664000      4.534864000      1.896814000
H        5.600099000      5.062257000      3.434822000
C        5.562868000     -1.452992000      2.065684000
H        5.111588000     -1.315254000      1.087365000
C        6.986116000     -2.021752000      1.843259000
H        7.467512000     -2.255747000      2.786991000
H        7.607319000     -1.308919000      1.310848000
H        6.933249000     -2.934190000      1.256508000
C        4.690103000     -2.468923000      2.842882000
H        5.122052000     -2.689616000      3.813890000
H        4.607699000     -3.398246000      2.286936000
H        3.691433000     -2.072003000      2.997845000
C        4.252160000      1.061721000     -2.645161000
C        4.245605000     -0.009806000     -3.562414000
C        4.483923000      0.242582000     -4.908939000
H        4.472795000     -0.578921000     -5.611340000
C        4.733753000      1.519358000     -5.369200000
H        4.917733000      1.695921000     -6.420709000
C        4.741797000      2.570110000     -4.473105000
H        4.930447000      3.571091000     -4.835048000
C        4.504361000      2.369184000     -3.119175000
C        3.954629000     -1.463053000     -3.141726000
H        3.882421000     -1.494259000     -2.057220000
C        2.605215000     -1.947201000     -3.727678000
H        1.802408000     -1.270820000     -3.458948000
H        2.363272000     -2.936245000     -3.351009000
H        2.653311000     -2.000175000     -4.810566000
C        5.078158000     -2.442257000     -3.569649000
H        5.119522000     -2.539972000     -4.649323000
H        4.887002000     -3.426109000     -3.151603000
H        6.051608000     -2.110377000     -3.225681000
C        4.496189000      3.607084000     -2.200144000
H        4.345031000      3.277671000     -1.176062000
C        5.840179000      4.376299000     -2.253222000
H        6.675010000      3.714936000     -2.048228000
H        5.842591000      5.170908000     -1.512900000
H        5.993896000      4.825346000     -3.228823000
C        3.329035000      4.562244000     -2.553188000
H        3.443231000      4.963233000     -3.555181000
H        3.303299000      5.394011000     -1.855363000
H        2.377538000      4.043959000     -2.500629000
C       -3.362659000      3.309113000     -0.632891000
C       -4.325497000      4.408740000     -1.061335000
C       -5.444001000      4.717973000     -0.290177000
H       -5.643954000      4.160060000      0.611359000
C       -6.313439000      5.724892000     -0.676448000
H       -7.179682000      5.947794000     -0.067016000
C       -6.075843000      6.441769000     -1.839202000
H       -6.754140000      7.230520000     -2.140373000
C       -4.966616000      6.142779000     -2.615101000
H       -4.772265000      6.697675000     -3.523834000
C       -4.100362000      5.132556000     -2.229798000
H       -3.237550000      4.911006000     -2.838224000
C       -3.224666000      4.086956000      1.725211000
C       -4.079306000      3.689152000      2.776818000
C       -4.309790000      4.561780000      3.833903000
H       -4.962510000      4.256377000      4.639598000
C       -3.723978000      5.811322000      3.877362000
H       -3.915446000      6.476533000      4.709018000
C       -2.889768000      6.202043000      2.849171000
H       -2.427959000      7.178688000      2.885860000
C       -2.627667000      5.365477000      1.770333000
C       -4.769296000      2.311445000      2.817812000
H       -4.508846000      1.774048000      1.909354000
C       -6.315173000      2.420002000      2.859185000
H       -6.648720000      2.932967000      3.755297000
H       -6.751400000      1.425406000      2.858181000
H       -6.700261000      2.955916000      1.998449000
C       -4.277269000      1.481280000      4.029831000
H       -4.605839000      1.929805000      4.961813000
H       -3.194456000      1.421604000      4.046091000
H       -4.676372000      0.472699000      3.980066000
C       -1.664923000      5.877691000      0.681455000
H       -1.609456000      5.134253000     -0.107920000
C       -2.160640000      7.199270000      0.042502000
H       -3.172420000      7.093930000     -0.333855000
H       -1.514504000      7.474830000     -0.785791000
H       -2.148088000      8.010416000      0.762849000
C       -0.235139000      6.065973000      1.246836000
H       -0.214241000      6.851352000      1.995480000
H        0.449316000      6.338810000      0.449018000
H        0.121369000      5.149848000      1.705534000
C       -3.279391000      2.210465000     -2.856284000
C       -4.566157000      1.706329000     -3.154640000
C       -4.934172000      1.521496000     -4.482386000
H       -5.918565000      1.137003000     -4.708825000
C       -4.072566000      1.817474000     -5.518848000
H       -4.380218000      1.670805000     -6.545753000
C       -2.811493000      2.297148000     -5.228998000
H       -2.135052000      2.525359000     -6.040406000
C       -2.391910000      2.495314000     -3.918519000
C       -5.600473000      1.323908000     -2.076223000
H       -5.175103000      1.526693000     -1.096747000
C       -6.904013000      2.152235000     -2.209677000
H       -6.694231000      3.215519000     -2.224228000
H       -7.562840000      1.944349000     -1.371753000
H       -7.431638000      1.898144000     -3.123008000
C       -5.943820000     -0.186217000     -2.133628000
H       -6.439667000     -0.435907000     -3.065844000
H       -6.611177000     -0.444261000     -1.316839000
H       -5.048385000     -0.791961000     -2.049635000
C       -0.954816000      3.013318000     -3.705055000
H       -0.747298000      3.017040000     -2.639079000
C        0.082866000      2.089210000     -4.393424000
H       -0.089173000      1.049349000     -4.139559000
H        1.087260000      2.357123000     -4.079447000
H        0.033828000      2.185647000     -5.472878000
C       -0.763663000      4.462897000     -4.220774000
H       -1.017087000      4.538546000     -5.273458000
H        0.273185000      4.762052000     -4.100491000
H       -1.378674000      5.166210000     -3.670756000
C       -1.414173000     -4.617220000      0.087844000
C       -1.871101000     -6.063772000     -0.010233000
C       -1.598776000     -6.970333000      1.012154000
H       -1.030162000     -6.653702000      1.874366000
C       -2.034922000     -8.282233000      0.922880000
H       -1.811287000     -8.977552000      1.721684000
C       -2.753738000     -8.703191000     -0.186010000
H       -3.096491000     -9.728290000     -0.253853000
C       -3.032173000     -7.807514000     -1.206968000
H       -3.595801000     -8.128158000     -2.073642000
C       -2.591466000     -6.496722000     -1.119764000
H       -2.819597000     -5.799081000     -1.911545000
C       -2.347277000     -4.270772000      2.370408000
C       -1.646313000     -4.530909000      3.566306000
C       -2.356970000     -4.814908000      4.724528000
H       -1.823642000     -5.001830000      5.645886000
C       -3.738526000     -4.864610000      4.720881000
H       -4.278182000     -5.088634000      5.631699000
C       -4.423899000     -4.625840000      3.546736000
H       -5.504351000     -4.664226000      3.548333000
C       -3.754478000     -4.325818000      2.364774000
C       -0.108479000     -4.479963000      3.622960000
H        0.264009000     -4.474589000      2.601147000
C        0.366655000     -3.175128000      4.304849000
H       -0.051790000     -2.307607000      3.801249000
H        1.449899000     -3.103717000      4.276901000
H        0.048135000     -3.142223000      5.342105000
C        0.512326000     -5.709951000      4.330479000
H        0.274823000     -5.720175000      5.388889000
H        1.593403000     -5.682955000      4.230124000
H        0.153785000     -6.636278000      3.892977000
C       -4.590278000     -4.036402000      1.103841000
H       -3.911023000     -3.865798000      0.273357000
C       -5.497440000     -5.233952000      0.725863000
H       -6.255966000     -5.404117000      1.482813000
H       -4.914378000     -6.142513000      0.617385000
H       -5.999832000     -5.035480000     -0.216299000
C       -5.440505000     -2.753905000      1.278817000
H       -6.166115000     -2.873861000      2.076887000
H       -5.977418000     -2.535145000      0.360929000
H       -4.808675000     -1.903902000      1.516646000
C       -0.274336000     -4.577344000     -2.113627000
C        0.860995000     -5.417238000     -2.050002000
C        1.377213000     -5.952953000     -3.224493000
H        2.244422000     -6.596226000     -3.175249000
C        0.811458000     -5.678936000     -4.453255000
H        1.231027000     -6.103651000     -5.355669000
C       -0.295068000     -4.856253000     -4.517079000
H       -0.738264000     -4.641041000     -5.479167000
C       -0.854034000     -4.301810000     -3.371585000
C        1.579866000     -5.774352000     -0.732698000
H        1.067215000     -5.281376000      0.089128000
C        1.551112000     -7.300792000     -0.463925000
H        0.538966000     -7.686771000     -0.505173000
H        1.959263000     -7.512900000      0.519869000
H        2.147417000     -7.833144000     -1.197564000
C        3.048551000     -5.280064000     -0.727265000
H        3.632788000     -5.788277000     -1.487250000
H        3.502461000     -5.482268000      0.238330000
H        3.102648000     -4.213135000     -0.912199000
C       -2.088683000     -3.394887000     -3.541450000
H       -2.431379000     -3.100537000     -2.554128000
C       -1.733283000     -2.110438000     -4.331042000
H       -1.441610000     -2.351028000     -5.348393000
H       -0.913166000     -1.579875000     -3.860973000
H       -2.591349000     -1.446238000     -4.372833000
C       -3.263313000     -4.119505000     -4.248022000
H       -4.133241000     -3.469722000     -4.270166000
H       -3.538138000     -5.033320000     -3.732670000
H       -3.008304000     -4.373892000     -5.271488000
C       -0.644009000      3.024296000      4.352575000
C       -0.166870000      2.306580000      3.248774000
C        0.522664000      1.077728000      3.405550000
C        0.702176000      0.607965000      4.734324000
C        0.220697000      1.326113000      5.831376000
C       -0.460227000      2.541331000      5.654717000
H       -1.158543000      3.970573000      4.188309000
H       -0.271469000      2.730634000      2.248219000
H        1.242979000     -0.325406000      4.894854000
H        0.382863000      0.933247000      6.835413000
H       -0.833084000      3.099245000      6.511962000
N        0.992434000      0.372402000      2.295374000
H        1.342556000     -0.539634000      2.620850000
H       -2.404314000     -1.547496000      2.072686000
252
CN
Y       -2.072789000     -0.239035000     -0.222405000
Y        0.654310000      1.723329000     -0.346940000
Y        1.456749000     -1.405904000     -0.277359000
N       -4.285595000     -0.900900000     -0.952992000
N       -3.847232000     -1.023517000      1.274257000
N        1.076298000      4.094702000     -0.563557000
N        1.458682000      3.265476000      1.513482000
N        3.144563000     -2.784254000     -1.325573000
N        2.610129000     -3.234857000      0.824626000
C        1.872233000      0.205936000     -2.139095000
H        2.964702000      0.044514000     -2.111548000
H        1.752215000      1.206189000     -2.597159000
C       -0.075936000     -0.110168000      1.461684000
H        0.288955000      0.791477000      1.982926000
H       -1.063683000     -0.290928000      1.944174000
H        0.537296000     -0.923764000      1.908198000
C        2.725965000      0.522837000      0.670237000
H        3.531181000     -0.207095000      0.433415000
H        3.135588000      1.460455000      0.251146000
H        2.722200000      0.646265000      1.761763000
C       -0.790025000     -2.451804000     -0.720483000
H       -0.409582000     -2.823433000     -1.692563000
H       -0.366619000     -3.134801000      0.048195000
H       -1.851512000     -2.760064000     -0.742142000
C       -1.832157000      2.134339000      0.429420000
H       -2.711722000      2.358613000     -0.209990000
H       -1.349949000      3.118662000      0.569593000
H       -2.225753000      1.886152000      1.432737000
C       -4.736008000     -1.266646000      0.272196000
C       -6.079347000     -1.947008000      0.496065000
C       -7.270170000     -1.367426000      0.069506000
H       -7.254339000     -0.401280000     -0.411528000
C       -8.478737000     -2.015096000      0.271455000
H       -9.398288000     -1.549900000     -0.059815000
C       -8.509782000     -3.253341000      0.894189000
H       -9.454253000     -3.759871000      1.049514000
C       -7.326859000     -3.842460000      1.314290000
H       -7.342612000     -4.812236000      1.794898000
C       -6.119790000     -3.191909000      1.117099000
H       -5.198054000     -3.658678000      1.430914000
C       -5.041037000     -1.084814000     -2.180128000
C       -5.696379000      0.021017000     -2.762664000
C       -6.338564000     -0.137098000     -3.983953000
H       -6.831646000      0.710432000     -4.438829000
C       -6.359331000     -1.357887000     -4.631637000
H       -6.864368000     -1.461956000     -5.583022000
C       -5.730321000     -2.442362000     -4.054832000
H       -5.746141000     -3.395967000     -4.563755000
C       -5.069909000     -2.330057000     -2.835974000
C       -5.698959000      1.413261000     -2.102766000
H       -5.298690000      1.310361000     -1.096702000
C       -4.782232000      2.386498000     -2.880457000
H       -3.777443000      1.986804000     -2.957866000
H       -4.733424000      3.345023000     -2.372805000
H       -5.159867000      2.551614000     -3.884599000
C       -7.119364000      2.022152000     -1.982974000
H       -7.075033000      2.940523000     -1.404999000
H       -7.806708000      1.344105000     -1.488601000
H       -7.526885000      2.261649000     -2.959414000
C       -4.360881000     -3.573844000     -2.270574000
H       -3.972472000     -3.326393000     -1.286820000
C       -5.327127000     -4.771762000     -2.097828000
H       -5.694337000     -5.121916000     -3.056769000
H       -6.179655000     -4.494642000     -1.486412000
H       -4.812219000     -5.595998000     -1.612934000
C       -3.159979000     -3.972042000     -3.163465000
H       -3.496089000     -4.292287000     -4.144571000
H       -2.606109000     -4.788556000     -2.709379000
H       -2.486797000     -3.130119000     -3.293586000
C       -4.206923000     -1.090305000      2.680201000
C       -3.672228000     -2.096605000      3.510867000
C       -3.967314000     -2.087663000      4.870157000
H       -3.553069000     -2.856941000      5.506402000
C       -4.775533000     -1.117297000      5.425566000
H       -4.993686000     -1.127278000      6.485322000
C       -5.298010000     -0.129049000      4.614510000
H       -5.923658000      0.636441000      5.051561000
C       -5.029814000     -0.093099000      3.252085000
C       -2.738076000     -3.204711000      2.988070000
H       -2.672702000     -3.114418000      1.905558000
C       -1.312576000     -3.041812000      3.572224000
H       -0.933778000     -2.042437000      3.394121000
H       -0.632933000     -3.755780000      3.116778000
H       -1.314352000     -3.214550000      4.643531000
C       -3.264336000     -4.626172000      3.315301000
H       -3.238622000     -4.813209000      4.383588000
H       -2.640941000     -5.370971000      2.830071000
H       -4.284918000     -4.763736000      2.975915000
C       -5.626130000      1.070587000      2.435093000
H       -5.372883000      0.925363000      1.388795000
C       -7.171060000      1.121918000      2.543486000
H       -7.611445000      0.163565000      2.290741000
H       -7.565855000      1.870871000      1.863320000
H       -7.482488000      1.384167000      3.549078000
C       -5.024043000      2.429681000      2.870772000
H       -5.277125000      2.654577000      3.901893000
H       -5.411915000      3.227223000      2.243972000
H       -3.943273000      2.420081000      2.779654000
C        1.500538000      4.353816000      0.708049000
C        1.964817000      5.733613000      1.163672000
C        2.786098000      6.519185000      0.356908000
H        3.116382000      6.144712000     -0.599569000
C        3.197865000      7.774436000      0.773969000
H        3.838822000      8.367545000      0.134578000
C        2.794054000      8.266743000      2.005535000
H        3.115082000      9.248366000      2.331317000
C        1.978184000      7.494829000      2.817922000
H        1.656073000      7.870645000      3.780448000
C        1.568693000      6.238941000      2.400082000
H        0.928599000      5.649910000      3.038202000
C        0.913799000      5.111591000     -1.584701000
C        1.758549000      5.103282000     -2.716464000
C        1.574938000      6.057744000     -3.710856000
H        2.226290000      6.055453000     -4.573573000
C        0.580789000      7.010726000     -3.619683000
H        0.453613000      7.745340000     -4.403791000
C       -0.252175000      7.014525000     -2.518023000
H       -1.034329000      7.757694000     -2.451028000
C       -0.107267000      6.085460000     -1.494996000
C        2.891983000      4.075857000     -2.911108000
H        2.866612000      3.372959000     -2.080711000
C        4.294440000      4.735806000     -2.902158000
H        4.384530000      5.472607000     -3.694053000
H        5.057773000      3.978562000     -3.055286000
H        4.494102000      5.226136000     -1.955539000
C        2.705774000      3.270791000     -4.221752000
H        2.864204000      3.901756000     -5.090128000
H        1.705896000      2.854925000     -4.285450000
H        3.421328000      2.455061000     -4.262141000
C       -1.090148000      6.165811000     -0.308616000
H       -0.805539000      5.420237000      0.427909000
C       -1.046569000      7.552959000      0.381922000
H       -0.031710000      7.827451000      0.646501000
H       -1.643689000      7.533825000      1.288802000
H       -1.448239000      8.323358000     -0.267829000
C       -2.543139000      5.853451000     -0.746355000
H       -2.896040000      6.580809000     -1.470356000
H       -3.203787000      5.884584000      0.115024000
H       -2.613432000      4.867743000     -1.191846000
C        2.025034000      3.229789000      2.851374000
C        3.420031000      3.320357000      3.073140000
C        3.911926000      3.222878000      4.370216000
H        4.977672000      3.291872000      4.535585000
C        3.075304000      3.044399000      5.452260000
H        3.480137000      2.975684000      6.453180000
C        1.714693000      2.957136000      5.239607000
H        1.056108000      2.823117000      6.085948000
C        1.171662000      3.041759000      3.963387000
C        4.458579000      3.525744000      1.950313000
H        3.938435000      3.584496000      0.997989000
C        5.252795000      4.843750000      2.143833000
H        4.588637000      5.689043000      2.279045000
H        5.876126000      5.032669000      1.274844000
H        5.899238000      4.779339000      3.012765000
C        5.457903000      2.343952000      1.867810000
H        6.062452000      2.284035000      2.766636000
H        6.124749000      2.484825000      1.022514000
H        4.938645000      1.401151000      1.741421000
C       -0.360569000      2.928285000      3.836500000
H       -0.610680000      2.899732000      2.781784000
C       -0.889276000      1.627353000      4.493617000
H       -0.324856000      0.763609000      4.160772000
H       -1.932581000      1.475533000      4.233546000
H       -0.819835000      1.679885000      5.574983000
C       -1.095035000      4.144932000      4.456257000
H       -0.838994000      4.263182000      5.504467000
H       -2.169189000      4.001956000      4.384619000
H       -0.846644000      5.064951000      3.939014000
C        3.406789000     -3.545007000     -0.235552000
C        4.496289000     -4.602939000     -0.185954000
C        4.660246000     -5.514724000     -1.225722000
H        3.992758000     -5.486366000     -2.073806000
C        5.663408000     -6.468980000     -1.173516000
H        5.775117000     -7.175066000     -1.986246000
C        6.520040000     -6.519209000     -0.084256000
H        7.305644000     -7.263684000     -0.044881000
C        6.368467000     -5.612097000      0.953631000
H        7.036776000     -5.642200000      1.804541000
C        5.361679000     -4.661904000      0.903482000
H        5.254140000     -3.950148000      1.708198000
C        3.907997000     -2.785720000     -2.557455000
C        3.325745000     -3.323050000     -3.725607000
C        4.012192000     -3.233797000     -4.929805000
H        3.565807000     -3.638989000     -5.827191000
C        5.257300000     -2.639312000     -5.003601000
H        5.778172000     -2.579200000     -5.950171000
C        5.831649000     -2.124895000     -3.858591000
H        6.806624000     -1.661670000     -3.918870000
C        5.180534000     -2.183786000     -2.631110000
C        1.944577000     -4.007388000     -3.718100000
H        1.598314000     -4.058435000     -2.688335000
C        0.908509000     -3.192729000     -4.530738000
H        0.835046000     -2.177570000     -4.156208000
H       -0.070998000     -3.656134000     -4.461965000
H        1.188809000     -3.145639000     -5.578155000
C        2.000826000     -5.458605000     -4.260169000
H        2.279706000     -5.474863000     -5.308597000
H        1.024351000     -5.924301000     -4.164559000
H        2.716775000     -6.060309000     -3.710606000
C        5.884494000     -1.570353000     -1.405337000
H        5.249304000     -1.713368000     -0.535251000
C        7.237976000     -2.267595000     -1.116689000
H        7.947400000     -2.086424000     -1.917523000
H        7.108502000     -3.339587000     -1.012875000
H        7.664385000     -1.883455000     -0.194714000
C        6.100123000     -0.046310000     -1.576951000
H        6.758408000      0.162536000     -2.413967000
H        6.550213000      0.367520000     -0.679835000
H        5.156524000      0.460825000     -1.750288000
C        2.487093000     -4.045873000      2.020418000
C        1.866657000     -5.314701000      1.970559000
C        1.694770000     -6.033602000      3.147361000
H        1.219705000     -7.003916000      3.110204000
C        2.110624000     -5.532861000      4.365170000
H        1.964253000     -6.106718000      5.270733000
C        2.712744000     -4.291637000      4.415127000
H        3.036358000     -3.899727000      5.369184000
C        2.914702000     -3.536533000      3.265432000
C        1.344342000     -5.944100000      0.663078000
H        1.565022000     -5.270442000     -0.160396000
C        2.034795000     -7.298505000      0.362367000
H        3.114194000     -7.194226000      0.363041000
H        1.726471000     -7.664410000     -0.612574000
H        1.764870000     -8.044293000      1.102743000
C       -0.192216000     -6.138197000      0.699193000
H       -0.477321000     -6.849156000      1.467782000
H       -0.541424000     -6.515584000     -0.257384000
H       -0.697414000     -5.199519000      0.899826000
C        3.592475000     -2.160137000      3.414031000
H        3.731877000     -1.740597000      2.421280000
C        2.704648000     -1.185057000      4.226403000
H        2.589172000     -1.529130000      5.249278000
H        1.717664000     -1.099976000      3.785702000
H        3.155117000     -0.197370000      4.249176000
C        4.989938000     -2.257387000      4.078181000
H        5.459503000     -1.278167000      4.086901000
H        5.640583000     -2.939079000      3.541102000
H        4.913188000     -2.602330000      5.104040000
C       -1.364656000      3.676042000     -4.118295000
C       -1.299237000      2.806744000     -3.020371000
C       -1.068201000      1.422804000     -3.198808000
C       -0.881059000      0.956087000     -4.526686000
C       -0.945937000      1.828274000     -5.614686000
C       -1.190856000      3.198391000     -5.422978000
H       -1.556090000      4.734349000     -3.944822000
H       -1.461956000      3.188333000     -2.014539000
H       -0.699921000     -0.106785000     -4.692603000
H       -0.806361000      1.434299000     -6.621512000
H       -1.244579000      3.875909000     -6.273494000
N       -1.018835000      0.551866000     -2.095478000
H       -0.637764000     -0.338687000     -2.443391000
H        1.490327000     -0.456018000     -2.939984000
252
TS3N, Imaginary frequency = i72.75 cm-1
Y       -0.632892000     -1.905836000     -0.378015000
Y       -1.322800000      1.385037000     -0.446265000
Y        2.046377000      0.601764000     -0.539330000
N       -0.846326000     -4.269221000     -0.887659000
N       -1.233474000     -3.620497000      1.247991000
N       -3.192475000      2.832043000     -0.791298000
N       -2.327985000      2.888718000      1.299585000
N        4.276066000      1.223812000     -1.225316000
N        3.984452000      0.852210000      0.981831000
C        1.353952000      1.553199000     -2.669622000
H        2.075245000      2.390412000     -2.710245000
H        0.372344000      2.022210000     -2.874071000
C        0.174826000     -0.067735000      1.272157000
H       -0.453580000      0.679864000      1.794179000
H       -0.098234000     -1.006686000      1.802472000
H        1.189325000      0.134869000      1.681425000
C        0.733316000      2.704487000      0.106096000
H        1.802766000      2.995705000      0.063338000
H        0.261824000      3.491065000     -0.517532000
H        0.425790000      2.900049000      1.145312000
C        1.810018000     -1.933193000     -0.980602000
H        2.895361000     -1.751406000     -1.113793000
H        1.805091000     -2.768657000     -0.249201000
H        1.512101000     -2.387437000     -1.947522000
C       -2.675237000     -0.640098000      0.403063000
H       -3.227417000     -1.439648000     -0.134365000
H       -3.417668000      0.181512000      0.448869000
H       -2.574012000     -0.985910000      1.444470000
C       -1.219243000     -4.653159000      0.364008000
C       -1.609959000     -6.081827000      0.718313000
C       -2.439974000     -6.811070000     -0.131071000
H       -2.808338000     -6.356754000     -1.037850000
C       -2.810600000     -8.108256000      0.182344000
H       -3.459464000     -8.657178000     -0.487832000
C       -2.353783000     -8.699232000      1.350574000
H       -2.641154000     -9.714320000      1.595450000
C       -1.529717000     -7.983220000      2.204772000
H       -1.168404000     -8.436039000      3.119044000
C       -1.163912000     -6.683653000      1.892593000
H       -0.520345000     -6.138313000      2.564859000
C       -0.563017000     -5.206257000     -1.958630000
C       -1.397738000     -5.249201000     -3.094655000
C       -1.109153000     -6.144027000     -4.119011000
H       -1.754236000     -6.182849000     -4.985408000
C       -0.016119000     -6.984047000     -4.054887000
H        0.190920000     -7.675343000     -4.861112000
C        0.818994000     -6.921377000     -2.957210000
H        1.686631000     -7.564757000     -2.916890000
C        0.570812000     -6.047023000     -1.906180000
C       -2.607031000     -4.313280000     -3.280995000
H       -2.680170000     -3.662871000     -2.410466000
C       -2.400867000     -3.418835000     -4.527333000
H       -1.461152000     -2.880121000     -4.460447000
H       -3.205507000     -2.696315000     -4.608778000
H       -2.387050000     -4.014737000     -5.433863000
C       -3.949704000     -5.077459000     -3.401496000
H       -4.763128000     -4.369855000     -3.532181000
H       -4.155039000     -5.663647000     -2.512361000
H       -3.943722000     -5.746397000     -4.256028000
C        1.588340000     -6.011779000     -0.749182000
H        1.234739000     -5.314113000      0.005328000
C        1.753132000     -7.395214000     -0.071394000
H        2.204276000     -8.110774000     -0.750674000
H        0.795031000     -7.788701000      0.249878000
H        2.396213000     -7.306628000      0.799237000
C        2.964170000     -5.501361000     -1.246008000
H        3.384844000     -6.176412000     -1.984139000
H        3.658386000     -5.433650000     -0.414311000
H        2.870919000     -4.518413000     -1.696458000
C       -1.674992000     -3.726469000      2.625224000
C       -0.722378000     -3.633108000      3.664766000
C       -1.151467000     -3.694296000      4.985104000
H       -0.423948000     -3.632034000      5.782146000
C       -2.488373000     -3.834974000      5.302448000
H       -2.802280000     -3.880878000      6.336946000
C       -3.420086000     -3.912575000      4.287063000
H       -4.466508000     -4.016841000      4.537460000
C       -3.041901000     -3.861190000      2.949910000
C        0.789453000     -3.463151000      3.405490000
H        0.941932000     -3.346276000      2.334564000
C        1.348509000     -2.199440000      4.107196000
H        0.757433000     -1.323928000      3.865554000
H        2.371284000     -2.020062000      3.790137000
H        1.347977000     -2.320820000      5.185215000
C        1.608172000     -4.699654000      3.857691000
H        1.454183000     -4.903253000      4.912636000
H        2.666647000     -4.517025000      3.699502000
H        1.335089000     -5.585691000      3.295732000
C       -4.153027000     -3.946372000      1.884106000
H       -3.692970000     -3.890737000      0.900316000
C       -4.927621000     -5.286108000      1.970666000
H       -4.252084000     -6.132732000      1.924957000
H       -5.629665000     -5.362993000      1.145673000
H       -5.488753000     -5.348925000      2.897257000
C       -5.148287000     -2.764597000      2.001572000
H       -5.685038000     -2.800754000      2.943883000
H       -5.875596000     -2.812651000      1.196602000
H       -4.631590000     -1.813366000      1.938224000
C       -3.253387000      3.395634000      0.447121000
C       -4.262145000      4.471802000      0.825303000
C       -4.553287000      5.520620000     -0.044488000
H       -4.048325000      5.584864000     -0.995705000
C       -5.476188000      6.493381000      0.303846000
H       -5.685370000      7.303595000     -0.382635000
C       -6.126443000      6.430341000      1.526766000
H       -6.848735000      7.190096000      1.798791000
C       -5.847963000      5.389428000      2.399190000
H       -6.353614000      5.329552000      3.354285000
C       -4.922525000      4.419290000      2.050861000
H       -4.718903000      3.608731000      2.733029000
C       -4.126027000      3.092472000     -1.869289000
C       -3.676571000      3.769240000     -3.024292000
C       -4.556200000      3.958033000     -4.084666000
H       -4.215973000      4.478561000     -4.968935000
C       -5.857343000      3.500148000     -4.030580000
H       -6.526388000      3.656101000     -4.866577000
C       -6.299358000      2.846787000     -2.896709000
H       -7.320553000      2.494444000     -2.855247000
C       -5.461472000      2.634056000     -1.808943000
C       -2.247074000      4.332944000     -3.165267000
H       -1.678759000      4.060679000     -2.277201000
C       -2.233617000      5.880524000     -3.256802000
H       -2.798535000      6.224120000     -4.117542000
H       -1.211356000      6.232253000     -3.360037000
H       -2.656301000      6.335821000     -2.368058000
C       -1.515397000      3.740310000     -4.393866000
H       -1.974422000      4.075006000     -5.318184000
H       -1.541344000      2.656839000     -4.376163000
H       -0.477593000      4.059151000     -4.396515000
C       -6.047231000      1.911753000     -0.577682000
H       -5.283056000      1.865754000      0.193071000
C       -7.261691000      2.680120000      0.004275000
H       -7.016870000      3.720412000      0.186377000
H       -7.569349000      2.230781000      0.943820000
H       -8.105067000      2.644367000     -0.677376000
C       -6.466575000      0.455611000     -0.897844000
H       -7.233794000      0.429811000     -1.664823000
H       -6.864334000     -0.017894000     -0.005170000
H       -5.620260000     -0.127641000     -1.241119000
C       -2.056705000      3.447474000      2.613663000
C       -1.448980000      4.714917000      2.766466000
C       -1.156086000      5.176830000      4.045288000
H       -0.692770000      6.146290000      4.162356000
C       -1.442639000      4.428976000      5.169075000
H       -1.205717000      4.808682000      6.154153000
C       -2.037336000      3.192000000      5.020839000
H       -2.266684000      2.606930000      5.900361000
C       -2.352716000      2.685817000      3.765961000
C       -1.088287000      5.638811000      1.584077000
H       -1.368035000      5.145004000      0.657138000
C       -1.857740000      6.982970000      1.660323000
H       -2.924084000      6.821249000      1.765870000
H       -1.686076000      7.560761000      0.756969000
H       -1.519370000      7.572723000      2.505847000
C        0.432553000      5.929239000      1.517148000
H        0.761798000      6.480984000      2.391376000
H        0.653967000      6.527153000      0.638118000
H        1.004281000      5.010582000      1.456479000
C       -3.019956000      1.298078000      3.697700000
H       -3.185434000      1.053821000      2.653095000
C       -2.105728000      0.207252000      4.307771000
H       -1.119349000      0.235453000      3.860108000
H       -2.531990000     -0.776705000      4.138349000
H       -1.995171000      0.346744000      5.378128000
C       -4.397163000      1.265795000      4.408917000
H       -4.298911000      1.502755000      5.463356000
H       -4.828854000      0.272758000      4.325416000
H       -5.092255000      1.970899000      3.966619000
C        4.852153000      1.213994000     -0.000952000
C        6.308437000      1.575817000      0.244183000
C        7.315699000      1.048259000     -0.559464000
H        7.062033000      0.362172000     -1.354032000
C        8.641681000      1.382845000     -0.336614000
H        9.414982000      0.960751000     -0.965452000
C        8.976225000      2.254532000      0.688500000
H       10.012397000      2.517978000      0.861033000
C        7.979733000      2.788463000      1.491540000
H        8.233697000      3.472753000      2.290816000
C        6.654692000      2.448857000      1.272007000
H        5.880538000      2.874495000      1.892914000
C        4.866296000      1.756514000     -2.434500000
C        5.224757000      0.871639000     -3.473506000
C        5.676765000      1.388662000     -4.680704000
H        5.942309000      0.713776000     -5.482353000
C        5.797277000      2.751245000     -4.876805000
H        6.152647000      3.136814000     -5.823304000
C        5.463334000      3.616246000     -3.853933000
H        5.561077000      4.681625000     -4.009862000
C        4.994732000      3.146735000     -2.631828000
C        5.127020000     -0.657983000     -3.313021000
H        4.909780000     -0.871216000     -2.269200000
C        3.976119000     -1.244164000     -4.166567000
H        3.029477000     -0.784202000     -3.903886000
H        3.894912000     -2.314824000     -4.003223000
H        4.154154000     -1.073288000     -5.223646000
C        6.455294000     -1.375503000     -3.665731000
H        6.677800000     -1.292506000     -4.724306000
H        6.378928000     -2.430957000     -3.421271000
H        7.290311000     -0.958970000     -3.112054000
C        4.622555000      4.178270000     -1.548852000
H        4.282592000      3.643295000     -0.665871000
C        5.845955000      5.035057000     -1.135424000
H        6.181315000      5.656315000     -1.959505000
H        6.673497000      4.406033000     -0.825039000
H        5.581903000      5.686339000     -0.307400000
C        3.462545000      5.097379000     -2.005747000
H        3.751900000      5.693174000     -2.865316000
H        3.187054000      5.773538000     -1.201788000
H        2.589209000      4.512220000     -2.274442000
C        4.403790000      0.497506000      2.323276000
C        5.126125000     -0.692556000      2.561530000
C        5.450817000     -1.043676000      3.866058000
H        5.998695000     -1.957567000      4.048263000
C        5.081479000     -0.253855000      4.936958000
H        5.341856000     -0.544582000      5.946090000
C        4.372414000      0.907921000      4.706086000
H        4.079947000      1.523633000      5.545087000
C        4.027552000      1.302813000      3.418687000
C        5.539805000     -1.654381000      1.430850000
H        5.281822000     -1.202608000      0.477634000
C        7.065157000     -1.924344000      1.420982000
H        7.623064000     -0.994546000      1.388329000
H        7.331291000     -2.513816000      0.548507000
H        7.371456000     -2.474580000      2.304382000
C        4.762564000     -2.989622000      1.528524000
H        4.995000000     -3.509063000      2.452629000
H        5.027814000     -3.636982000      0.698454000
H        3.691872000     -2.812374000      1.496166000
C        3.220438000      2.603939000      3.249843000
H        3.105061000      2.794646000      2.186013000
C        1.808458000      2.460054000      3.869115000
H        1.871391000      2.310993000      4.942244000
H        1.282967000      1.614043000      3.440710000
H        1.223124000      3.355227000      3.685745000
C        3.934294000      3.831810000      3.870817000
H        3.368793000      4.733189000      3.653659000
H        4.934603000      3.956150000      3.470247000
H        4.012320000      3.736234000      4.948775000
C       -4.120149000     -0.012642000     -4.088152000
C       -3.231872000     -0.213796000     -3.022904000
C       -1.833025000     -0.206859000     -3.229795000
C       -1.364974000      0.014935000     -4.550175000
C       -2.258316000      0.208920000     -5.607885000
C       -3.644684000      0.200386000     -5.388703000
H       -5.192402000     -0.030972000     -3.895844000
H       -3.613264000     -0.403508000     -2.023563000
H       -0.291505000      0.027731000     -4.736662000
H       -1.864709000      0.369254000     -6.611656000
H       -4.337809000      0.352245000     -6.214485000
N       -0.935870000     -0.419640000     -2.153190000
H        0.016009000     -0.285316000     -2.525301000
H        1.570666000      0.946234000     -3.570411000
252
DN
Y        0.141898000      1.979639000     -0.367424000
Y        1.726529000     -0.976502000     -0.505351000
Y       -1.905734000     -0.988253000     -0.771661000
N       -0.174733000      4.324713000     -0.877563000
N        0.428511000      3.792464000      1.239195000
N        3.822353000     -2.054761000     -0.856701000
N        2.963584000     -2.319753000      1.227777000
N       -4.034146000     -2.077382000     -1.166143000
N       -3.574441000     -1.652927000      1.011668000
C       -1.800978000     -1.050555000     -3.209459000
H       -2.723706000     -1.594325000     -3.474605000
H       -0.974605000     -1.655570000     -3.630431000
C       -0.184270000     -0.109959000      1.168551000
H        0.567492000     -0.757401000      1.668560000
H       -0.124109000      0.814915000      1.783523000
H       -1.141601000     -0.551697000      1.514151000
C       -0.020486000     -2.740480000     -0.742960000
H       -0.937520000     -3.322763000     -0.521284000
H        0.286581000     -3.101910000     -1.740826000
H        0.693912000     -3.176636000     -0.013835000
C       -2.258384000      1.549259000     -0.871427000
H       -2.123974000      2.097413000     -1.825082000
H       -3.282653000      1.134808000     -0.955409000
H       -2.384609000      2.327912000     -0.089803000
C        2.471943000      1.290495000      0.383718000
H        2.781724000      2.229096000     -0.118857000
H        3.417870000      0.713413000      0.434348000
H        2.259083000      1.564685000      1.430068000
C        0.150277000      4.790777000      0.359130000
C        0.220076000      6.272075000      0.702340000
C        0.826434000      7.167125000     -0.177177000
H        1.252373000      6.804499000     -1.100222000
C        0.902337000      8.516293000      0.126716000
H        1.380723000      9.196008000     -0.566550000
C        0.369597000      8.992750000      1.315012000
H        0.426622000     10.047909000      1.552393000
C       -0.234277000      8.111758000      2.198673000
H       -0.653171000      8.474909000      3.128267000
C       -0.305485000      6.761418000      1.895924000
H       -0.781405000      6.086342000      2.590150000
C       -0.692290000      5.160407000     -1.944367000
C        0.073121000      5.355459000     -3.112844000
C       -0.438348000      6.140373000     -4.140080000
H        0.151837000      6.295663000     -5.032208000
C       -1.684531000      6.725836000     -4.046029000
H       -2.065436000      7.335033000     -4.855075000
C       -2.445529000      6.514187000     -2.913593000
H       -3.429022000      6.957903000     -2.848525000
C       -1.977452000      5.740312000     -1.858548000
C        1.452603000      4.704415000     -3.327368000
H        1.697277000      4.111372000     -2.447185000
C        1.411978000      3.751292000     -4.546357000
H        0.618030000      3.019708000     -4.433980000
H        2.354778000      3.223568000     -4.642640000
H        1.237187000      4.302996000     -5.464052000
C        2.586053000      5.744969000     -3.510895000
H        3.534115000      5.234061000     -3.651061000
H        2.676950000      6.389281000     -2.643023000
H        2.407055000      6.368996000     -4.380530000
C       -2.919359000      5.523240000     -0.657941000
H       -2.399060000      4.932719000      0.091482000
C       -3.339602000      6.860255000      0.002949000
H       -3.958860000      7.447657000     -0.666742000
H       -2.472188000      7.453062000      0.271372000
H       -3.912250000      6.663615000      0.904498000
C       -4.179575000      4.728842000     -1.083436000
H       -4.761566000      5.285304000     -1.810805000
H       -4.808770000      4.539887000     -0.219259000
H       -3.904802000      3.775637000     -1.523115000
C        0.888455000      3.998529000      2.598986000
C        0.027522000      3.678943000      3.672656000
C        0.482173000      3.832656000      4.976848000
H       -0.178116000      3.596179000      5.799356000
C        1.759370000      4.283936000      5.245945000
H        2.094787000      4.397572000      6.268392000
C        2.604418000      4.585655000      4.197194000
H        3.605476000      4.933971000      4.409433000
C        2.196565000      4.452267000      2.874580000
C       -1.411957000      3.162988000      3.468354000
H       -1.578727000      3.025907000      2.402032000
C       -1.630825000      1.795748000      4.163821000
H       -0.865392000      1.084361000      3.876382000
H       -2.597796000      1.387898000      3.886423000
H       -1.607064000      1.900023000      5.243392000
C       -2.473241000      4.172263000      3.976570000
H       -2.331577000      4.387502000      5.030923000
H       -3.467748000      3.756833000      3.846714000
H       -2.427274000      5.106767000      3.428518000
C        3.215475000      4.802227000      1.771486000
H        2.746065000      4.641873000      0.803876000
C        3.654318000      6.286890000      1.846445000
H        2.796911000      6.950033000      1.835352000
H        4.286902000      6.530396000      0.997945000
H        4.219163000      6.477361000      2.753093000
C        4.466126000      3.889977000      1.842160000
H        5.018710000      4.059250000      2.760458000
H        5.126691000      4.102375000      1.006794000
H        4.186606000      2.843149000      1.799502000
C        3.980814000     -2.606214000      0.375817000
C        5.187325000     -3.458775000      0.742943000
C        5.604812000     -4.491924000     -0.092419000
H        5.054652000     -4.705815000     -0.996233000
C        6.708579000     -5.262340000      0.236199000
H        7.017133000     -6.065172000     -0.420936000
C        7.412324000     -5.007620000      1.403366000
H        8.275825000     -5.608886000      1.659729000
C        7.005923000     -3.980184000      2.241063000
H        7.551915000     -3.772840000      3.152372000
C        5.900385000     -3.212241000      1.913187000
H        5.596338000     -2.407095000      2.564417000
C        4.800561000     -2.109876000     -1.926077000
C        4.535332000     -2.905798000     -3.060942000
C        5.404893000     -2.854154000     -4.143555000
H        5.197640000     -3.450165000     -5.021266000
C        6.536378000     -2.061795000     -4.116783000
H        7.203500000     -2.034994000     -4.968380000
C        6.817529000     -1.316385000     -2.988752000
H        7.713187000     -0.711304000     -2.965385000
C        5.970657000     -1.322832000     -1.886113000
C        3.320340000     -3.852639000     -3.132580000
H        2.873888000     -3.902727000     -2.141708000
C        3.722597000     -5.296824000     -3.528110000
H        4.062618000     -5.342081000     -4.557282000
H        2.864350000     -5.954946000     -3.429699000
H        4.516179000     -5.676761000     -2.893229000
C        2.242434000     -3.330354000     -4.111413000
H        2.635918000     -3.265533000     -5.120887000
H        1.900487000     -2.341815000     -3.822256000
H        1.386700000     -3.998741000     -4.120328000
C        6.365110000     -0.474726000     -0.659946000
H        5.618923000     -0.622729000      0.115942000
C        7.735147000     -0.920115000     -0.087424000
H        7.747735000     -1.986784000      0.107920000
H        7.935992000     -0.398761000      0.843823000
H        8.537791000     -0.692012000     -0.781003000
C        6.403487000      1.039873000     -0.979956000
H        7.134318000      1.258074000     -1.751880000
H        6.675114000      1.598368000     -0.089165000
H        5.434960000      1.391419000     -1.316818000
C        2.864138000     -2.927460000      2.544918000
C        2.525607000     -4.290716000      2.693503000
C        2.386957000     -4.820550000      3.971627000
H        2.125204000     -5.863014000      4.086305000
C        2.570444000     -4.044220000      5.098289000
H        2.455688000     -4.475568000      6.083971000
C        2.900085000     -2.711341000      4.953350000
H        3.043216000     -2.103498000      5.835708000
C        3.055943000     -2.136332000      3.697746000
C        2.278210000     -5.234170000      1.498526000
H        2.480630000     -4.691076000      0.579624000
C        3.215363000     -6.468159000      1.532633000
H        4.253291000     -6.168895000      1.624992000
H        3.104384000     -7.042551000      0.617664000
H        2.973269000     -7.117062000      2.367606000
C        0.803553000     -5.706708000      1.445686000
H        0.559856000     -6.310848000      2.313551000
H        0.637615000     -6.308124000      0.556749000
H        0.124483000     -4.861659000      1.417511000
C        3.424550000     -0.641476000      3.626437000
H        3.576430000     -0.380072000      2.583096000
C        2.276928000      0.238224000      4.179472000
H        1.349461000      0.031022000      3.658997000
H        2.514452000      1.290084000      4.053521000
H        2.121312000      0.050558000      5.236983000
C        4.735106000     -0.311811000      4.386101000
H        4.628915000     -0.495830000      5.450050000
H        4.982046000      0.736953000      4.249802000
H        5.568380000     -0.903396000      4.022946000
C       -4.412653000     -2.245086000      0.118083000
C       -5.623843000     -3.076794000      0.524960000
C       -6.907371000     -2.748946000      0.101423000
H       -7.061814000     -1.874113000     -0.511669000
C       -7.990672000     -3.530410000      0.471529000
H       -8.985099000     -3.260409000      0.139858000
C       -7.801464000     -4.653759000      1.261354000
H       -8.647826000     -5.265178000      1.548320000
C       -6.523664000     -4.994282000      1.678438000
H       -6.367176000     -5.874737000      2.288415000
C       -5.442149000     -4.209582000      1.312507000
H       -4.445399000     -4.484765000      1.624213000
C       -4.725553000     -2.668030000     -2.296516000
C       -5.583523000     -1.869915000     -3.083927000
C       -6.169440000     -2.420182000     -4.216681000
H       -6.819940000     -1.810727000     -4.828007000
C       -5.934780000     -3.732453000     -4.581906000
H       -6.400548000     -4.143128000     -5.468127000
C       -5.096351000     -4.512215000     -3.811362000
H       -4.906371000     -5.535144000     -4.104885000
C       -4.482473000     -4.002778000     -2.672158000
C       -5.869948000     -0.392769000     -2.748068000
H       -5.472551000     -0.191975000     -1.756199000
C       -5.158664000      0.556554000     -3.743633000
H       -4.089619000      0.378780000     -3.748788000
H       -5.335658000      1.590917000     -3.464001000
H       -5.534846000      0.407507000     -4.750918000
C       -7.386205000     -0.068328000     -2.725009000
H       -7.810113000     -0.110346000     -3.722725000
H       -7.540493000      0.935111000     -2.339294000
H       -7.936379000     -0.761374000     -2.097759000
C       -3.514820000     -4.910915000     -1.891384000
H       -3.198734000     -4.382401000     -0.995514000
C       -4.185148000     -6.231058000     -1.436823000
H       -4.450696000     -6.849598000     -2.287702000
H       -5.086234000     -6.030391000     -0.866581000
H       -3.502405000     -6.796790000     -0.809566000
C       -2.246901000     -5.208638000     -2.729533000
H       -2.494928000     -5.786154000     -3.614423000
H       -1.531747000     -5.776475000     -2.141530000
H       -1.775145000     -4.283975000     -3.048469000
C       -3.970905000     -1.464938000      2.397672000
C       -4.953916000     -0.502535000      2.728563000
C       -5.281285000     -0.286127000      4.060170000
H       -6.026352000      0.456083000      4.309319000
C       -4.670143000     -0.995236000      5.076218000
H       -4.938354000     -0.813771000      6.108575000
C       -3.709838000     -1.931849000      4.757913000
H       -3.226471000     -2.482809000      5.552185000
C       -3.347237000     -2.182392000      3.437870000
C       -5.656771000      0.365910000      1.667199000
H       -5.393352000     -0.009063000      0.683353000
C       -7.200386000      0.316048000      1.791356000
H       -7.556224000     -0.708226000      1.818431000
H       -7.655810000      0.814890000      0.940945000
H       -7.537993000      0.816569000      2.692560000
C       -5.168549000      1.832738000      1.746685000
H       -5.431005000      2.276510000      2.701795000
H       -5.627301000      2.422992000      0.959452000
H       -4.090835000      1.884213000      1.630211000
C       -2.239307000     -3.221722000      3.188810000
H       -2.125416000     -3.348325000      2.113882000
C       -0.890795000     -2.724044000      3.764150000
H       -0.938974000     -2.651645000      4.845665000
H       -0.641316000     -1.745821000      3.371752000
H       -0.092773000     -3.411752000      3.507216000
C       -2.575557000     -4.605874000      3.801683000
H       -1.836723000     -5.337430000      3.488915000
H       -3.553730000     -4.954990000      3.490907000
H       -2.564826000     -4.562579000      4.885629000
C        3.918451000      0.824135000     -4.017191000
C        2.978630000      0.843409000     -2.974299000
C        1.622116000      0.513656000     -3.208453000
C        1.248780000      0.166224000     -4.533496000
C        2.191348000      0.155616000     -5.563476000
C        3.536312000      0.478853000     -5.317626000
H        4.951756000      1.095629000     -3.806501000
H        3.281608000      1.169644000     -1.981486000
H        0.212030000     -0.089848000     -4.741709000
H        1.869735000     -0.107403000     -6.571195000
H        4.265798000      0.470726000     -6.125759000
N        0.687103000      0.524913000     -2.141335000
H       -0.224169000      0.205248000     -2.525996000
H       -1.838506000     -0.121671000     -3.811636000
252
TS4N, Imaginary frequency = i503.56 cm-1
Y       -0.582649000     -1.792028000     -0.389587000
Y       -1.368158000      1.464997000     -0.200929000
Y        1.961560000      0.563965000     -0.648719000
N       -1.061397000     -4.130560000     -0.755687000
N       -0.997305000     -3.474596000      1.428445000
N       -3.200866000      2.807184000     -1.016960000
N       -2.623558000      3.069769000      1.161880000
N        4.251873000      1.190636000     -1.187827000
N        3.808739000      0.912436000      1.013218000
C        1.795400000      1.251068000     -3.088708000
H        2.055982000      2.308422000     -2.930015000
H        1.120771000      1.223783000     -3.958520000
C        0.215994000      0.005067000      1.373143000
H       -0.364974000      0.759369000      1.946645000
H       -0.065281000     -0.938742000      1.883062000
H        1.250046000      0.175313000      1.732598000
C        0.750413000      2.763475000     -0.246422000
H        1.804167000      3.100223000     -0.219238000
H        0.304694000      3.384032000     -1.049234000
H        0.340714000      3.141525000      0.712575000
C        1.971981000     -1.937344000     -0.419409000
H        2.532435000     -2.156250000     -1.346719000
H        2.727098000     -1.598925000      0.320864000
H        1.693271000     -2.933463000     -0.025275000
C       -2.685719000     -0.638530000      0.323266000
H       -3.202298000     -1.353618000     -0.349492000
H       -3.457087000      0.134696000      0.499922000
H       -2.576279000     -1.151516000      1.294542000
C       -1.091352000     -4.508437000      0.548119000
C       -1.121546000     -5.968799000      0.980846000
C       -2.107317000     -6.852136000      0.552845000
H       -2.903919000     -6.501140000     -0.084087000
C       -2.083576000     -8.179259000      0.952186000
H       -2.861576000     -8.853372000      0.617545000
C       -1.068493000     -8.641668000      1.775227000
H       -1.049984000     -9.679179000      2.084963000
C       -0.073598000     -7.771748000      2.195135000
H        0.728554000     -8.127194000      2.829112000
C       -0.101388000     -6.444645000      1.799272000
H        0.684004000     -5.771732000      2.108477000
C       -1.141656000     -5.050653000     -1.880370000
C       -2.378287000     -5.221399000     -2.543731000
C       -2.427145000     -5.981027000     -3.704567000
H       -3.367563000     -6.098342000     -4.224119000
C       -1.297041000     -6.599164000     -4.206979000
H       -1.354439000     -7.187749000     -5.113228000
C       -0.100940000     -6.474013000     -3.531939000
H        0.777305000     -6.975710000     -3.913575000
C        0.000066000     -5.711254000     -2.372039000
C       -3.687738000     -4.605545000     -2.011323000
H       -3.503797000     -4.252527000     -1.000522000
C       -4.135939000     -3.391027000     -2.855099000
H       -3.382296000     -2.612578000     -2.838307000
H       -5.060282000     -2.981560000     -2.459728000
H       -4.304093000     -3.678454000     -3.888120000
C       -4.844693000     -5.636542000     -1.947911000
H       -5.684236000     -5.209878000     -1.407194000
H       -4.544208000     -6.548865000     -1.443939000
H       -5.188991000     -5.900118000     -2.942250000
C        1.369622000     -5.633834000     -1.673026000
H        1.265997000     -5.013694000     -0.787525000
C        1.849472000     -7.032122000     -1.208917000
H        2.038986000     -7.680529000     -2.058095000
H        1.106174000     -7.506471000     -0.577082000
H        2.771313000     -6.939103000     -0.642263000
C        2.438583000     -4.981518000     -2.582955000
H        2.645560000     -5.602838000     -3.448280000
H        3.365144000     -4.846885000     -2.032854000
H        2.105324000     -4.011068000     -2.934570000
C       -1.354634000     -3.619692000      2.834281000
C       -0.380925000     -3.505664000      3.849358000
C       -0.768711000     -3.569121000      5.184291000
H       -0.017371000     -3.479547000      5.955727000
C       -2.086781000     -3.743964000      5.547249000
H       -2.367844000     -3.791650000      6.590950000
C       -3.043475000     -3.855367000      4.558598000
H       -4.078304000     -3.989530000      4.839762000
C       -2.708912000     -3.795495000      3.211842000
C        1.118540000     -3.290712000      3.569141000
H        1.272358000     -3.296484000      2.492228000
C        1.591993000     -1.923004000      4.121867000
H        0.962271000     -1.118032000      3.763635000
H        2.612368000     -1.724980000      3.811900000
H        1.562225000     -1.917276000      5.206324000
C        1.994963000     -4.411111000      4.188940000
H        1.979712000     -4.356786000      5.272271000
H        3.024160000     -4.298290000      3.863210000
H        1.652782000     -5.398278000      3.900783000
C       -3.867413000     -3.918770000      2.201319000
H       -3.459107000     -3.865385000      1.197023000
C       -4.606541000     -5.273918000      2.346512000
H       -3.911339000     -6.105028000      2.314596000
H       -5.324465000     -5.395133000      1.540851000
H       -5.146108000     -5.320578000      3.286542000
C       -4.888533000     -2.762442000      2.348939000
H       -5.375762000     -2.794927000      3.317860000
H       -5.654127000     -2.846437000      1.583287000
H       -4.405662000     -1.797840000      2.242108000
C       -3.455770000      3.445822000      0.156397000
C       -4.579177000      4.456403000      0.326861000
C       -4.753864000      5.496139000     -0.583059000
H       -4.070642000      5.604015000     -1.412510000
C       -5.787125000      6.405191000     -0.422301000
H       -5.907595000      7.211835000     -1.133931000
C       -6.661900000      6.282889000      0.646676000
H       -7.470616000      6.992446000      0.770670000
C       -6.497871000      5.249116000      1.556092000
H       -7.179122000      5.145568000      2.390826000
C       -5.461604000      4.343191000      1.397937000
H       -5.343918000      3.533387000      2.102683000
C       -4.001280000      2.946574000     -2.217945000
C       -3.471568000      3.645842000     -3.322854000
C       -4.193826000      3.689861000     -4.508591000
H       -3.785582000      4.215368000     -5.360478000
C       -5.426414000      3.075331000     -4.620874000
H       -5.975650000      3.120497000     -5.552138000
C       -5.951132000      2.403611000     -3.534859000
H       -6.914809000      1.922199000     -3.625900000
C       -5.261076000      2.325471000     -2.330222000
C       -2.101887000      4.348735000     -3.265222000
H       -1.761497000      4.337422000     -2.232448000
C       -2.172446000      5.831350000     -3.710431000
H       -2.418871000      5.915468000     -4.763605000
H       -1.208770000      6.306616000     -3.552601000
H       -2.917424000      6.380180000     -3.143624000
C       -1.056621000      3.590927000     -4.118687000
H       -1.333043000      3.603923000     -5.168384000
H       -0.979577000      2.556549000     -3.801036000
H       -0.079429000      4.052983000     -4.016963000
C       -5.893843000      1.525716000     -1.175977000
H       -5.253390000      1.617400000     -0.303453000
C       -7.291491000      2.069483000     -0.788641000
H       -7.244837000      3.128609000     -0.558092000
H       -7.663517000      1.545054000      0.086625000
H       -8.004015000      1.927133000     -1.594369000
C       -5.981293000      0.021098000     -1.530184000
H       -6.654964000     -0.143638000     -2.365041000
H       -6.349011000     -0.544179000     -0.678970000
H       -5.003276000     -0.363516000     -1.800377000
C       -2.545522000      3.728845000      2.451787000
C       -1.984882000      5.019251000      2.576499000
C       -1.845142000      5.579340000      3.841094000
H       -1.415419000      6.566553000      3.937649000
C       -2.235447000      4.900303000      4.977962000
H       -2.113855000      5.352373000      5.953461000
C       -2.780557000      3.637497000      4.856904000
H       -3.083998000      3.105378000      5.747580000
C       -2.948572000      3.037703000      3.614620000
C       -1.493631000      5.843358000      1.369290000
H       -1.675238000      5.272837000      0.462146000
C       -2.257030000      7.186364000      1.244977000
H       -3.329131000      7.025484000      1.223445000
H       -1.968198000      7.694789000      0.329815000
H       -2.028303000      7.840299000      2.080040000
C        0.029480000      6.116620000      1.447026000
H        0.270224000      6.739228000      2.302509000
H        0.359860000      6.631733000      0.549900000
H        0.587052000      5.190417000      1.532362000
C       -3.560738000      1.624094000      3.568452000
H       -3.698531000      1.348878000      2.526295000
C       -2.614349000      0.583975000      4.217728000
H       -1.637816000      0.600897000      3.746787000
H       -3.025803000     -0.415535000      4.115421000
H       -2.482448000      0.789493000      5.275210000
C       -4.949666000      1.558550000      4.253887000
H       -4.869757000      1.742364000      5.320166000
H       -5.381238000      0.571741000      4.114629000
H       -5.634304000      2.289071000      3.836309000
C        4.728738000      1.275917000      0.075018000
C        6.132772000      1.767408000      0.410096000
C        7.240138000      1.339128000     -0.318192000
H        7.112029000      0.629223000     -1.120243000
C        8.509649000      1.804683000     -0.015950000
H        9.358679000      1.456162000     -0.589666000
C        8.691284000      2.711670000      1.016555000
H        9.683193000      3.077197000      1.251702000
C        7.596222000      3.149398000      1.745424000
H        7.727213000      3.860989000      2.550381000
C        6.328533000      2.679199000      1.444382000
H        5.480564000      3.031064000      2.010359000
C        4.965486000      1.613267000     -2.375428000
C        5.432710000      0.636871000     -3.283609000
C        6.039938000      1.044262000     -4.464567000
H        6.398486000      0.299602000     -5.161526000
C        6.197161000      2.383150000     -4.767721000
H        6.672322000      2.681054000     -5.693056000
C        5.743291000      3.336841000     -3.879058000
H        5.866709000      4.383782000     -4.118925000
C        5.127307000      2.979575000     -2.684575000
C        5.297538000     -0.876939000     -3.017598000
H        4.813540000     -1.009393000     -2.052402000
C        4.422582000     -1.574910000     -4.089011000
H        3.436754000     -1.126782000     -4.143722000
H        4.307688000     -2.626485000     -3.844755000
H        4.881228000     -1.505137000     -5.069959000
C        6.674713000     -1.586607000     -2.948264000
H        7.200127000     -1.512079000     -3.894886000
H        6.534457000     -2.639682000     -2.722776000
H        7.305745000     -1.160031000     -2.176534000
C        4.640188000      4.107035000     -1.752978000
H        4.203364000      3.655644000     -0.866063000
C        5.810784000      5.012004000     -1.291578000
H        6.228895000      5.562289000     -2.128128000
H        6.603331000      4.424600000     -0.841071000
H        5.458182000      5.730792000     -0.557755000
C        3.542057000      4.970714000     -2.421839000
H        3.929433000      5.486654000     -3.294370000
H        3.178752000      5.716341000     -1.720669000
H        2.703364000      4.357523000     -2.733416000
C        4.175883000      0.672426000      2.396551000
C        5.013637000     -0.415206000      2.740889000
C        5.323795000     -0.642175000      4.076064000
H        5.962298000     -1.474460000      4.336870000
C        4.831989000      0.169276000      5.079293000
H        5.087550000     -0.022286000      6.112967000
C        4.004526000      1.222251000      4.747383000
H        3.614648000      1.854257000      5.532890000
C        3.662839000      1.491195000      3.426450000
C        5.590953000     -1.397204000      1.699864000
H        5.316131000     -1.054789000      0.706571000
C        7.137849000     -1.469257000      1.763710000
H        7.578615000     -0.480762000      1.700696000
H        7.515109000     -2.065794000      0.938348000
H        7.468105000     -1.930030000      2.688640000
C        5.000640000     -2.818720000      1.875452000
H        5.280563000     -3.238857000      2.836057000
H        5.375441000     -3.475810000      1.096169000
H        3.918092000     -2.799946000      1.813481000
C        2.715004000      2.678455000      3.162731000
H        2.519375000      2.726496000      2.095298000
C        1.361652000      2.482032000      3.891694000
H        1.482872000      2.572208000      4.966127000
H        0.945904000      1.504166000      3.680535000
H        0.649427000      3.236343000      3.570381000
C        3.325448000      4.038149000      3.590131000
H        2.611083000      4.834892000      3.405688000
H        4.228574000      4.265147000      3.035121000
H        3.567570000      4.041560000      4.647979000
C       -2.459262000     -1.028032000     -4.808656000
C       -2.093560000     -0.309309000     -3.669479000
C       -0.903636000     -0.626112000     -2.962326000
C       -0.134000000     -1.725816000     -3.429090000
C       -0.518450000     -2.456742000     -4.566816000
C       -1.676484000     -2.105952000     -5.265835000
H       -3.362842000     -0.747457000     -5.349913000
H       -2.695837000      0.532215000     -3.330482000
H        0.817212000     -1.940041000     -2.936157000
H        0.102537000     -3.283408000     -4.910898000
H       -1.971300000     -2.658190000     -6.156763000
N       -0.447847000      0.143371000     -1.860836000
H        0.508540000      0.651673000     -2.334638000
H        2.713834000      0.738852000     -3.403361000
247
2aN
Y       -1.510967000     -1.249077000      0.146706000
N       -3.260381000     -2.383139000      1.459775000
N       -3.271340000     -2.585871000     -0.802683000
N       -0.263150000     -0.057061000     -1.408940000
C        0.290786000     -0.083740000      1.737516000
H       -0.451651000     -0.647730000      2.344788000
C        0.455920000     -2.865499000      0.098658000
H        0.767408000     -3.289510000     -0.875804000
C       -2.494777000      0.950910000      0.813215000
H       -3.392756000      0.670165000      0.230270000
H       -2.634734000      0.518855000      1.823225000
C       -3.844424000     -2.955586000      0.375517000
C       -3.808600000     -2.442904000      2.799615000
C       -3.662279000     -3.085517000     -2.105659000
Y        1.783460000     -0.786067000     -0.355777000
Y       -0.304454000      1.819857000     -0.119295000
C        0.200041000     -0.484693000     -2.646048000
H        0.235988000      0.931842000      2.179563000
H        1.256836000     -0.467765000      2.121691000
H        1.304182000     -3.018676000      0.793851000
H       -0.300989000     -3.584226000      0.467457000
H       -2.617716000      2.040016000      0.967124000
C       -4.987045000     -3.956058000      0.467825000
C       -3.078160000     -3.074054000      3.828504000
C       -5.029149000     -1.804219000      3.117636000
C       -4.347515000     -2.226648000     -2.991879000
C       -3.294701000     -4.375815000     -2.535071000
N        4.004871000     -1.433558000     -1.031218000
N        3.670493000     -1.323147000      1.220155000
C        2.204157000      1.725792000     -0.070452000
H        3.234076000      1.324201000     -0.080489000
C        1.476056000     -0.051952000     -3.133023000
H        1.990261000      0.746208000     -2.588689000
C        4.551239000     -1.537817000      0.207444000
N       -0.180613000      4.025962000      0.981191000
N       -1.217747000      3.859000000     -1.030623000
H        2.140569000      2.258035000      0.895775000
H        2.221303000      2.512499000     -0.852739000
C       -0.816642000      4.682298000     -0.021039000
C       -0.496380000     -1.425392000     -3.470585000
C       -4.910652000     -5.009983000      1.375670000
C       -6.106887000     -3.855811000     -0.353904000
C       -3.589514000     -3.087175000      5.121212000
C       -1.703104000     -3.727431000      3.594910000
C       -5.497225000     -1.844212000      4.425170000
C       -5.855182000     -1.007166000      2.088408000
C       -4.634236000     -2.668205000     -4.277365000
C       -4.781183000     -0.803984000     -2.586222000
C       -3.610560000     -4.776240000     -3.828691000
C       -2.513851000     -5.352367000     -1.635896000
C        4.750825000     -1.572170000     -2.269225000
C        3.988045000     -1.634204000      2.606602000
C        1.992352000     -0.489397000     -4.367515000
C        6.033335000     -1.814173000      0.429021000
C        0.443596000      4.660612000      2.125304000
C       -2.058273000      4.281944000     -2.133564000
C       -1.047650000      6.186820000     -0.033632000
C        0.014476000     -1.836970000     -4.698717000
H       -1.461139000     -1.799958000     -3.132940000
H       -4.041813000     -5.105895000      2.010644000
C       -5.930743000     -5.943340000      1.460045000
C       -7.129618000     -4.786867000     -0.266232000
H       -6.186999000     -3.039380000     -1.056371000
H       -3.030265000     -3.576441000      5.906287000
C       -4.794362000     -2.487057000      5.424852000
H       -1.453623000     -3.632063000      2.541390000
C       -1.698007000     -5.239301000      3.933826000
C       -0.606299000     -2.999302000      4.412301000
H       -6.430019000     -1.354921000      4.667791000
H       -5.390733000     -1.111065000      1.111919000
C       -7.310839000     -1.526922000      1.978737000
C       -5.862844000      0.502636000      2.436574000
H       -5.151134000     -2.010467000     -4.962136000
C       -4.272661000     -3.933662000     -4.699158000
H       -4.578755000     -0.680366000     -1.525335000
C       -6.298847000     -0.569605000     -2.795880000
C       -3.972285000      0.272304000     -3.351601000
H       -3.324933000     -5.763958000     -4.162805000
H       -2.393755000     -4.896157000     -0.656843000
C       -3.265383000     -6.692260000     -1.439374000
C       -1.096542000     -5.608800000     -2.203635000
C        4.640600000     -2.766528000     -3.014595000
C        5.513605000     -0.505011000     -2.784372000
C        4.154044000     -0.605413000      3.559299000
C        4.056208000     -2.979628000      3.038008000
H        2.956530000     -0.111310000     -4.707143000
C        1.264360000     -1.375573000     -5.162629000
C        6.658390000     -2.924539000     -0.130012000
C        6.792286000     -0.923703000      1.182000000
C       -0.132348000      4.495223000      3.404864000
C        1.659611000      5.365931000      2.002884000
C       -1.534912000      4.300706000     -3.443161000
C       -3.416276000      4.612491000     -1.930174000
C       -1.531197000      6.843103000      1.095256000
C       -0.770997000      6.933801000     -1.176585000
H       -0.563169000     -2.533862000     -5.307161000
H       -5.854960000     -6.759374000      2.167093000
C       -7.043362000     -5.832871000      0.639666000
H       -7.996547000     -4.693004000     -0.907480000
H       -5.177699000     -2.508725000      6.436370000
H       -2.435301000     -5.776600000      3.346640000
H       -1.913781000     -5.406318000      4.984136000
H       -0.721241000     -5.662318000      3.718271000
H       -0.615258000     -1.933759000      4.207644000
H        0.374742000     -3.387901000      4.158741000
H       -0.759708000     -3.139211000      5.477389000
H       -7.331475000     -2.594483000      1.789605000
H       -7.823057000     -1.024687000      1.163389000
H       -7.863394000     -1.332952000      2.891969000
H       -4.851555000      0.892800000      2.483473000
H       -6.342033000      0.677869000      3.394370000
H       -6.408154000      1.055934000      1.678042000
H       -4.505456000     -4.260759000     -5.704038000
H       -6.889509000     -1.316455000     -2.275476000
H       -6.561168000     -0.603156000     -3.848148000
H       -6.575162000      0.407867000     -2.411761000
H       -2.909352000      0.161864000     -3.165292000
H       -4.272325000      1.265227000     -3.030877000
H       -4.140405000      0.195484000     -4.421259000
H       -4.266631000     -6.522855000     -1.057665000
H       -2.730163000     -7.316985000     -0.730306000
H       -3.344719000     -7.236456000     -2.374704000
H       -0.572311000     -4.670796000     -2.354581000
H       -1.146192000     -6.127517000     -3.155658000
H       -0.520063000     -6.217837000     -1.513637000
C        5.249283000     -2.848955000     -4.260373000
C        3.862074000     -3.991074000     -2.494284000
C        6.111954000     -0.637436000     -4.032980000
C        5.709526000      0.818255000     -2.020405000
C        4.368902000     -0.935847000      4.893022000
C        4.089909000      0.892254000      3.201311000
C        4.276862000     -3.257644000      4.381354000
C        3.878757000     -4.181325000      2.087932000
H        1.652037000     -1.705361000     -6.125022000
H        6.082519000     -3.626542000     -0.712996000
C        8.011629000     -3.145934000      0.070941000
C        8.146016000     -1.141469000      1.380485000
H        6.320514000     -0.046828000      1.598139000
C        0.513865000      5.021865000      4.515890000
C       -1.461158000      3.744545000      3.623583000
C        2.264530000      5.879785000      3.144919000
C        2.365247000      5.591006000      0.650834000
C       -2.361490000      4.656068000     -4.503063000
C       -0.079023000      3.912641000     -3.763521000
C       -4.202525000      4.960065000     -3.021656000
C       -4.088119000      4.564039000     -0.544140000
H       -1.758276000      6.278158000      1.986547000
C       -1.738011000      8.213215000      1.080914000
C       -0.973423000      8.304086000     -1.190378000
H       -0.383378000      6.442031000     -2.056147000
H       -7.841956000     -6.561343000      0.706124000
H        5.154850000     -3.756947000     -4.839161000
C        5.977252000     -1.793172000     -4.775212000
H        3.613596000     -3.813626000     -1.450524000
C        4.694248000     -5.297887000     -2.562906000
C        2.537769000     -4.190040000     -3.268246000
H        6.690946000      0.183321000     -4.432825000
H        5.221744000      0.729883000     -1.054190000
C        7.208618000      1.111720000     -1.760611000
C        5.058475000      2.009469000     -2.765475000
H        4.490339000     -0.144967000      5.619563000
C        4.431545000     -2.249001000      5.310850000
H        3.984831000      0.979292000      2.123498000
C        5.370631000      1.660286000      3.621505000
C        2.864134000      1.568665000      3.863992000
H        4.324796000     -4.287060000      4.707285000
H        3.745491000     -3.807908000      1.076664000
C        5.123255000     -5.105278000      2.091305000
C        2.620254000     -5.009782000      2.448267000
H        8.482889000     -4.017527000     -0.364842000
C        8.758297000     -2.255578000      0.827101000
H        8.723465000     -0.437397000      1.965746000
H        0.075170000      4.892082000      5.495416000
C        1.704848000      5.711452000      4.395206000
H       -1.844489000      3.448221000      2.651284000
C       -2.538594000      4.633719000      4.295794000
C       -1.255976000      2.461613000      4.466755000
H        3.195990000      6.420544000      3.052200000
H        1.773705000      5.119056000     -0.129905000
C        2.479999000      7.099412000      0.313316000
C        3.772867000      4.944262000      0.624041000
H       -1.959568000      4.671629000     -5.506420000
C       -3.685684000      4.989181000     -4.301976000
H        0.431064000      3.685750000     -2.828707000
C        0.707257000      5.057879000     -4.450424000
C       -0.037352000      2.643544000     -4.648766000
H       -5.243131000      5.208474000     -2.866947000
H       -3.329945000      4.343237000      0.201453000
C       -4.742146000      5.916009000     -0.163612000
C       -5.140923000      3.430123000     -0.481371000
H       -2.119375000      8.707301000      1.965220000
C       -1.459145000      8.946978000     -0.061752000
H       -0.749164000      8.870644000     -2.084949000
H        6.443976000     -1.875123000     -5.748019000
H        4.165333000     -6.095338000     -2.049366000
H        5.666259000     -5.180254000     -2.096239000
H        4.850493000     -5.608807000     -3.590431000
H        1.906018000     -3.312330000     -3.187888000
H        1.996213000     -5.042071000     -2.869494000
H        2.730092000     -4.371056000     -4.321011000
H        7.685308000      0.276612000     -1.258467000
H        7.310790000      1.992013000     -1.132794000
H        7.737179000      1.297444000     -2.689798000
H        4.002200000      1.829467000     -2.934584000
H        5.533625000      2.173917000     -3.727306000
H        5.159289000      2.916781000     -2.177468000
H        4.599770000     -2.485471000      6.353169000
H        6.269558000      1.189265000      3.240560000
H        5.454203000      1.713392000      4.701845000
H        5.330670000      2.675940000      3.239003000
H        1.952966000      1.032513000      3.630238000
H        2.763245000      2.591386000      3.513458000
H        2.975282000      1.591464000      4.943226000
H        6.028617000     -4.542005000      1.895112000
H        5.021345000     -5.868695000      1.325601000
H        5.234303000     -5.602838000      3.048953000
H        1.734050000     -4.385314000      2.458196000
H        2.723870000     -5.468014000      3.426433000
H        2.472981000     -5.799950000      1.717879000
H        9.816007000     -2.428172000      0.982416000
H        2.193323000      6.116246000      5.271710000
H       -2.728639000      5.533168000      3.720248000
H       -2.235188000      4.929323000      5.294785000
H       -3.470747000      4.082238000      4.376373000
H       -0.498653000      1.823180000      4.026244000
H       -2.184399000      1.901140000      4.525116000
H       -0.944527000      2.707440000      5.476954000
H        1.510790000      7.583703000      0.354249000
H        2.885021000      7.227450000     -0.686197000
H        3.140815000      7.602461000      1.011705000
H        3.718002000      3.884969000      0.849641000
H        4.431466000      5.414578000      1.346795000
H        4.214605000      5.061267000     -0.361058000
H       -4.313913000      5.263598000     -5.139071000
H        0.721858000      5.952058000     -3.836506000
H        0.269805000      5.312531000     -5.410279000
H        1.734509000      4.748421000     -4.619342000
H       -0.577345000      1.828672000     -4.177061000
H        0.989279000      2.329245000     -4.807107000
H       -0.487182000      2.832515000     -5.618019000
H       -4.029565000      6.729738000     -0.243803000
H       -5.103421000      5.877209000      0.859826000
H       -5.585569000      6.137488000     -0.809022000
H       -4.688025000      2.473794000     -0.721218000
H       -5.949370000      3.611215000     -1.182466000
H       -5.563658000      3.368273000      0.516794000
H       -1.619236000     10.017995000     -0.072768000
4
NH3
N       -0.000202000      0.000000000     -0.122556000
H       -0.471003000     -0.813618000      0.286169000
H       -0.468507000      0.815060000      0.286167000
H        0.940925000     -0.001440000      0.285554000
242
A'N
Y       -1.688535000     -0.989089000     -0.534612000
Y        0.197066000      1.844434000     -0.013594000
Y        1.601618000     -1.083537000     -0.067996000
N       -3.902328000     -1.833470000     -1.091668000
N       -3.560016000     -1.547400000      1.128159000
N        0.055766000      4.040504000     -1.013559000
N        0.673469000      3.964319000      1.161328000
N        3.572025000     -1.957262000     -1.172223000
N        3.230090000     -2.626751000      0.973502000
C        0.398239000      0.105163000     -1.667146000
H        1.190465000     -0.374370000     -2.298902000
H       -0.214208000      0.665101000     -2.408168000
C       -0.312913000     -0.178346000      1.631763000
H       -0.322882000      0.784184000      2.190194000
H       -1.271966000     -0.637339000      1.945825000
H        0.440278000     -0.766735000      2.193702000
C        2.469052000      1.141690000      0.830467000
H        3.390690000      0.528689000      0.874090000
H        2.786718000      2.025706000      0.242089000
H        2.324770000      1.503772000      1.865639000
C       -0.129295000     -2.937694000      0.049125000
H        0.515333000     -3.521414000     -0.640742000
H        0.230324000     -3.179228000      1.064769000
H       -1.110474000     -3.451851000     -0.009682000
C       -2.269335000      1.496049000     -0.445328000
H       -2.315330000      1.909014000     -1.469904000
H       -2.307528000      2.381036000      0.222373000
H       -3.255947000      1.028896000     -0.262289000
C       -4.426120000     -1.927680000      0.161467000
C       -5.858187000     -2.385232000      0.410356000
C       -6.895653000     -1.875984000     -0.368018000
H       -6.680565000     -1.143310000     -1.132117000
C       -8.202396000     -2.284735000     -0.157977000
H       -8.997774000     -1.875775000     -0.767643000
C       -8.490232000     -3.212279000      0.831880000
H       -9.511334000     -3.533805000      0.995247000
C       -7.465844000     -3.724173000      1.613091000
H       -7.682626000     -4.448550000      2.387619000
C       -6.159375000     -3.311069000      1.405558000
H       -5.367408000     -3.718066000      2.016068000
C       -4.491328000     -2.394913000     -2.283511000
C       -4.917389000     -1.532627000     -3.318304000
C       -5.356223000     -2.070991000     -4.520976000
H       -5.672482000     -1.409893000     -5.315710000
C       -5.399535000     -3.437482000     -4.722751000
H       -5.746350000     -3.839957000     -5.665240000
C       -4.993840000     -4.283722000     -3.710172000
H       -5.024648000     -5.352400000     -3.871406000
C       -4.534456000     -3.791352000     -2.493640000
C       -4.893933000     -0.000872000     -3.156790000
H       -4.696899000      0.221387000     -2.111545000
C       -3.758307000      0.633637000     -3.996861000
H       -2.790796000      0.236848000     -3.701375000
H       -3.738584000      1.709873000     -3.854851000
H       -3.897474000      0.431685000     -5.054592000
C       -6.249440000      0.654804000     -3.522342000
H       -6.225517000      1.710778000     -3.269810000
H       -7.067286000      0.193815000     -2.977929000
H       -6.457746000      0.568648000     -4.583596000
C       -4.060707000     -4.804446000     -1.432616000
H       -3.761696000     -4.257937000     -0.542619000
C       -5.191686000     -5.782076000     -1.026418000
H       -5.470837000     -6.422175000     -1.856945000
H       -6.073559000     -5.239794000     -0.702508000
H       -4.859445000     -6.415188000     -0.208982000
C       -2.823262000     -5.600753000     -1.917972000
H       -3.056824000     -6.191615000     -2.797924000
H       -2.484148000     -6.274545000     -1.136946000
H       -2.003473000     -4.933241000     -2.164471000
C       -3.936191000     -1.416353000      2.523221000
C       -3.391708000     -2.300569000      3.479520000
C       -3.710635000     -2.134791000      4.822058000
H       -3.296213000     -2.815587000      5.552382000
C       -4.545676000     -1.119689000      5.244014000
H       -4.781697000     -1.005660000      6.293724000
C       -5.072400000     -0.248708000      4.311351000
H       -5.719016000      0.551655000      4.642715000
C       -4.786900000     -0.376276000      2.957271000
C       -2.435679000     -3.448437000      3.100985000
H       -2.270726000     -3.409912000      2.028467000
C       -1.063620000     -3.286785000      3.801938000
H       -0.645488000     -2.305417000      3.607901000
H       -0.366445000     -4.035845000      3.438701000
H       -1.158299000     -3.408870000      4.875971000
C       -3.024423000     -4.843367000      3.432785000
H       -3.216625000     -4.944475000      4.496123000
H       -2.321111000     -5.618229000      3.141910000
H       -3.954029000     -5.018401000      2.902188000
C       -5.391050000      0.663425000      1.993818000
H       -5.129882000      0.385070000      0.977550000
C       -6.936787000      0.717425000      2.084292000
H       -7.369931000     -0.267060000      1.944762000
H       -7.329956000      1.376148000      1.315493000
H       -7.258977000      1.097081000      3.048143000
C       -4.795742000      2.068247000      2.257240000
H       -5.073852000      2.428278000      3.242560000
H       -5.162600000      2.776267000      1.520104000
H       -3.712960000      2.040052000      2.196481000
C        0.402470000      4.754677000      0.092418000
C        0.472529000      6.275207000      0.123476000
C        1.064262000      6.981079000     -0.921756000
H        1.486288000      6.445658000     -1.759149000
C        1.128879000      8.364837000     -0.891977000
H        1.596611000      8.897587000     -1.709847000
C        0.598253000      9.063403000      0.181622000
H        0.647280000     10.145000000      0.204333000
C        0.004153000      8.371343000      1.226018000
H       -0.415463000      8.909633000      2.066065000
C       -0.056414000      6.987606000      1.197938000
H       -0.527221000      6.458051000      2.012904000
C       -0.383588000      4.591927000     -2.276042000
C        0.431989000      4.424139000     -3.417739000
C       -0.015016000      4.890160000     -4.648106000
H        0.611128000      4.766815000     -5.520708000
C       -1.241358000      5.511418000     -4.780130000
H       -1.572016000      5.868826000     -5.746329000
C       -2.041967000      5.669834000     -3.666742000
H       -3.003646000      6.152085000     -3.772867000
C       -1.640391000      5.221680000     -2.413616000
C        1.811051000      3.736910000     -3.360318000
H        1.979825000      3.393407000     -2.342105000
C        2.964340000      4.709158000     -3.716507000
H        2.855229000      5.092358000     -4.726206000
H        3.916393000      4.190597000     -3.652042000
H        2.994238000      5.552102000     -3.034388000
C        1.865964000      2.498769000     -4.289003000
H        1.809856000      2.790128000     -5.333061000
H        1.044381000      1.823133000     -4.077868000
H        2.797005000      1.961102000     -4.136500000
C       -2.608129000      5.427374000     -1.231118000
H       -2.144555000      5.029776000     -0.331953000
C       -2.904764000      6.929293000     -0.988889000
H       -1.987311000      7.495887000     -0.875983000
H       -3.495682000      7.050752000     -0.085845000
H       -3.464777000      7.351536000     -1.816851000
C       -3.938961000      4.663032000     -1.443154000
H       -4.472200000      5.041673000     -2.309048000
H       -4.577852000      4.783918000     -0.573429000
H       -3.758291000      3.603653000     -1.588246000
C        1.184930000      4.431853000      2.430759000
C        2.496838000      4.939632000      2.556748000
C        2.956949000      5.334552000      3.807298000
H        3.960795000      5.724107000      3.902635000
C        2.163155000      5.235674000      4.932443000
H        2.538853000      5.551474000      5.896640000
C        0.888705000      4.718091000      4.814942000
H        0.270662000      4.630665000      5.697515000
C        0.383763000      4.308477000      3.586751000
C        3.472257000      5.039819000      1.368064000
H        2.957076000      4.713028000      0.468395000
C        3.960155000      6.492175000      1.136243000
H        3.123361000      7.173938000      1.032903000
H        4.557048000      6.543140000      0.230400000
H        4.574869000      6.831905000      1.963274000
C        4.689876000      4.103975000      1.571787000
H        5.268664000      4.402655000      2.439742000
H        5.338709000      4.144608000      0.702244000
H        4.367075000      3.077597000      1.712374000
C       -1.038879000      3.717727000      3.553771000
H       -1.253226000      3.399224000      2.535533000
C       -1.148468000      2.475452000      4.473826000
H       -0.356106000      1.765204000      4.260974000
H       -2.102573000      1.979555000      4.323508000
H       -1.076162000      2.758239000      5.518913000
C       -2.115744000      4.760852000      3.945333000
H       -1.948464000      5.135529000      4.950175000
H       -3.101168000      4.306250000      3.912942000
H       -2.111669000      5.603876000      3.262520000
C        4.046163000     -2.666664000     -0.108936000
C        5.385974000     -3.390745000     -0.114416000
C        5.763249000     -4.214111000     -1.172274000
H        5.091435000     -4.360842000     -2.004409000
C        6.989674000     -4.858741000     -1.161114000
H        7.266007000     -5.499846000     -1.988258000
C        7.858721000     -4.683780000     -0.095011000
H        8.818074000     -5.186154000     -0.087690000
C        7.495404000     -3.861525000      0.960573000
H        8.170513000     -3.715527000      1.793946000
C        6.266831000     -3.221264000      0.951001000
H        5.993890000     -2.572535000      1.770055000
C        4.315459000     -1.752726000     -2.399993000
C        3.886132000     -2.382574000     -3.587797000
C        4.581727000     -2.157103000     -4.769727000
H        4.257213000     -2.645329000     -5.677968000
C        5.679550000     -1.320923000     -4.809480000
H        6.208856000     -1.157358000     -5.738894000
C        6.086797000     -0.685663000     -3.653160000
H        6.934643000     -0.016020000     -3.689190000
C        5.426414000     -0.884116000     -2.446504000
C        2.648477000     -3.298830000     -3.641665000
H        2.215022000     -3.343569000     -2.645126000
C        1.580469000     -2.719165000     -4.602888000
H        1.327154000     -1.700371000     -4.327094000
H        0.678860000     -3.324347000     -4.573819000
H        1.941238000     -2.710655000     -5.626009000
C        2.994978000     -4.749074000     -4.063873000
H        3.436830000     -4.773223000     -5.054804000
H        2.093635000     -5.354926000     -4.081020000
H        3.691875000     -5.205627000     -3.369628000
C        5.908514000     -0.092509000     -1.216765000
H        5.348040000     -0.427375000     -0.348924000
C        7.411107000     -0.320599000     -0.918408000
H        8.034787000      0.089941000     -1.705463000
H        7.632290000     -1.378582000     -0.825057000
H        7.680613000      0.168386000      0.013090000
C        5.619369000      1.417523000     -1.400270000
H        6.177595000      1.820285000     -2.239503000
H        5.904696000      1.963847000     -0.506981000
H        4.561708000      1.583599000     -1.581381000
C        3.373434000     -3.464128000      2.147661000
C        3.118751000     -4.852275000      2.089089000
C        3.173739000     -5.603284000      3.257643000
H        2.978689000     -6.665606000      3.212844000
C        3.462930000     -5.022643000      4.476067000
H        3.495285000     -5.624339000      5.374696000
C        3.709008000     -3.665174000      4.535198000
H        3.934184000     -3.209950000      5.489475000
C        3.676299000     -2.873595000      3.393872000
C        2.756040000     -5.586029000      0.782583000
H        2.752888000     -4.864947000     -0.030371000
C        3.792419000     -6.685469000      0.437220000
H        4.797410000     -6.279055000      0.409150000
H        3.569587000     -7.115346000     -0.534940000
H        3.769426000     -7.484043000      1.171418000
C        1.338901000     -6.208391000      0.854675000
H        1.290385000     -6.980258000      1.615739000
H        1.082622000     -6.658817000     -0.099758000
H        0.595935000     -5.452849000      1.085923000
C        3.962657000     -1.367374000      3.544965000
H        3.999360000     -0.930097000      2.551362000
C        2.834557000     -0.660751000      4.336151000
H        2.795343000     -1.022046000      5.359032000
H        1.868274000     -0.841793000      3.877668000
H        3.006955000      0.411165000      4.359836000
C        5.327242000     -1.087879000      4.225146000
H        5.528496000     -0.020647000      4.217705000
H        6.138808000     -1.588888000      3.708084000
H        5.327767000     -1.422180000      5.257315000
N       -1.390485000     -2.150789000     -2.749233000
H       -0.675271000     -2.862761000     -2.578265000
H       -0.985649000     -1.510777000     -3.436136000
H       -2.201953000     -2.614631000     -3.169031000
242
TS1'N, Imaginary frequency = i1350.47 cm-1
Y        1.834568000      0.972336000     -0.537705000
Y       -0.238271000     -1.801962000     -0.047821000
Y       -1.567635000      1.184490000     -0.129699000
N        4.073389000      1.635975000     -1.105282000
N        3.651585000      1.462874000      1.101858000
N       -0.220945000     -4.015238000     -1.004092000
N       -0.779431000     -3.857751000      1.182571000
N       -3.548428000      2.048024000     -1.185122000
N       -3.166145000      2.681876000      0.961244000
C       -0.510004000     -0.108019000     -1.838587000
H       -1.526465000      0.065077000     -2.279568000
H       -0.080492000     -0.880029000     -2.509937000
C        0.303637000      0.190319000      1.571267000
H        0.256674000     -0.752799000      2.160833000
H        1.279357000      0.610172000      1.890626000
H       -0.423746000      0.830335000      2.111655000
C       -2.506047000     -1.017616000      0.719691000
H       -3.411245000     -0.379548000      0.729506000
H       -2.834536000     -1.901147000      0.136210000
H       -2.396565000     -1.367981000      1.762183000
C        0.230722000      2.915982000     -0.053659000
H       -0.340002000      3.496624000     -0.806361000
H       -0.206889000      3.177359000      0.929530000
H        1.214609000      3.422773000     -0.037769000
C        2.208058000     -1.556292000     -0.557336000
H        2.135869000     -2.015042000     -1.560980000
H        2.236274000     -2.410546000      0.151202000
H        3.243140000     -1.170304000     -0.489485000
C        4.565946000      1.780725000      0.146387000
C        5.991058000      2.233673000      0.424915000
C        7.041964000      1.724938000     -0.335532000
H        6.839160000      0.996139000     -1.106788000
C        8.344970000      2.130972000     -0.098897000
H        9.151506000      1.722801000     -0.694245000
C        8.614448000      3.056089000      0.898486000
H        9.632691000      3.375876000      1.082263000
C        7.575888000      3.569106000      1.660353000
H        7.778842000      4.292671000      2.439341000
C        6.273377000      3.158028000      1.426990000
H        5.469232000      3.565710000      2.020726000
C        4.646852000      2.172316000     -2.317595000
C        5.084103000      1.284758000     -3.323443000
C        5.525504000      1.794263000     -4.537916000
H        5.851992000      1.114612000     -5.312604000
C        5.559653000      3.154880000     -4.774676000
H        5.909396000      3.535293000     -5.725246000
C        5.142218000      4.024892000     -3.787012000
H        5.167259000      5.089117000     -3.976085000
C        4.679401000      3.562177000     -2.560539000
C        5.079595000     -0.241865000     -3.118038000
H        4.860378000     -0.437220000     -2.071868000
C        3.977955000     -0.921113000     -3.968221000
H        2.996389000     -0.534833000     -3.709672000
H        3.976599000     -1.993378000     -3.797118000
H        4.142290000     -0.745614000     -5.026879000
C        6.455480000     -0.883639000     -3.430224000
H        6.442310000     -1.934094000     -3.154687000
H        7.251190000     -0.397318000     -2.875134000
H        6.691459000     -0.817501000     -4.487095000
C        4.193575000      4.599603000     -1.529908000
H        3.874734000      4.074778000     -0.633525000
C        5.324154000      5.577540000     -1.122144000
H        5.630955000      6.190275000     -1.963521000
H        6.192382000      5.036886000     -0.760381000
H        4.978516000      6.237702000     -0.332050000
C        2.969804000      5.389349000     -2.056304000
H        3.230265000      5.979282000     -2.929100000
H        2.602486000      6.063391000     -1.288033000
H        2.166639000      4.712723000     -2.329609000
C        3.984670000      1.305821000      2.504256000
C        3.451697000      2.198761000      3.458814000
C        3.729226000      2.001448000      4.806608000
H        3.322519000      2.687388000      5.536463000
C        4.514538000      0.949882000      5.234297000
H        4.719086000      0.812690000      6.287847000
C        5.033651000      0.073106000      4.302410000
H        5.642928000     -0.754330000      4.638153000
C        4.786329000      0.229065000      2.944052000
C        2.555246000      3.392416000      3.074891000
H        2.425021000      3.385013000      1.996489000
C        1.155137000      3.274387000      3.727559000
H        0.704479000      2.314003000      3.504416000
H        0.500782000      4.056686000      3.354910000
H        1.219293000      3.375524000      4.806014000
C        3.187800000      4.754831000      3.457746000
H        3.340942000      4.827587000      4.529668000
H        2.529138000      5.563710000      3.155282000
H        4.144392000      4.900654000      2.968053000
C        5.379522000     -0.816760000      1.979751000
H        5.144362000     -0.522473000      0.961577000
C        6.921514000     -0.910668000      2.097165000
H        7.381349000      0.063471000      1.970426000
H        7.311597000     -1.575181000      1.331802000
H        7.216582000     -1.302826000      3.064736000
C        4.744016000     -2.208872000      2.214146000
H        4.990647000     -2.587297000      3.200891000
H        5.109741000     -2.917411000      1.476918000
H        3.663804000     -2.153138000      2.129363000
C       -0.568124000     -4.687122000      0.127186000
C       -0.691825000     -6.201915000      0.203811000
C       -1.317021000     -6.919890000     -0.813487000
H       -1.729005000     -6.398089000     -1.664151000
C       -1.427101000     -8.299079000     -0.739646000
H       -1.920529000     -8.840850000     -1.536219000
C       -0.908641000     -8.981510000      0.350204000
H       -0.993107000    -10.059707000      0.407087000
C       -0.280720000     -8.277691000      1.366617000
H        0.130186000     -8.803320000      2.218897000
C       -0.175076000     -6.898341000      1.294639000
H        0.321843000     -6.359965000      2.087841000
C        0.165012000     -4.617653000     -2.261891000
C       -0.671173000     -4.448008000     -3.388056000
C       -0.277357000     -4.975547000     -4.611939000
H       -0.920019000     -4.854464000     -5.472688000
C        0.917340000     -5.653921000     -4.752529000
H        1.206775000     -6.057329000     -5.713887000
C        1.740506000     -5.808786000     -3.655106000
H        2.678495000     -6.334008000     -3.769021000
C        1.390590000     -5.303782000     -2.408160000
C       -2.016622000     -3.696713000     -3.323185000
H       -2.125128000     -3.272957000     -2.326822000
C       -3.224249000     -4.640343000     -3.554807000
H       -3.164075000     -5.118503000     -4.527509000
H       -4.149183000     -4.072764000     -3.512440000
H       -3.270854000     -5.414572000     -2.796588000
C       -2.067678000     -2.528364000     -4.339350000
H       -2.099349000     -2.898130000     -5.359020000
H       -1.199382000     -1.886601000     -4.237220000
H       -2.957371000     -1.929124000     -4.170181000
C        2.379684000     -5.510898000     -1.243530000
H        1.953328000     -5.072274000     -0.344983000
C        2.629817000     -7.014830000     -0.964400000
H        1.696348000     -7.545205000     -0.813154000
H        3.238237000     -7.130934000     -0.072360000
H        3.154439000     -7.480171000     -1.792394000
C        3.730116000     -4.799941000     -1.510160000
H        4.226849000     -5.220314000     -2.378474000
H        4.386971000     -4.919769000     -0.653760000
H        3.582330000     -3.739213000     -1.680481000
C       -1.300176000     -4.266897000      2.469325000
C       -2.631786000     -4.714740000      2.617749000
C       -3.099433000     -5.052087000      3.882257000
H       -4.118115000     -5.395749000      3.994844000
C       -2.294500000     -4.953998000      4.999494000
H       -2.676714000     -5.224522000      5.974853000
C       -0.999577000     -4.496936000      4.858991000
H       -0.371742000     -4.411821000      5.734800000
C       -0.485704000     -4.145789000      3.616297000
C       -3.619905000     -4.814763000      1.439223000
H       -3.101222000     -4.535470000      0.525776000
C       -4.161923000     -6.255052000      1.256859000
H       -3.351395000     -6.970163000      1.171477000
H       -4.765981000     -6.312989000      0.356213000
H       -4.783465000     -6.545013000      2.097587000
C       -4.802172000     -3.830316000      1.621032000
H       -5.382922000     -4.078899000      2.503282000
H       -5.460036000     -3.878225000      0.758733000
H       -4.443432000     -2.811464000      1.723359000
C        0.963482000     -3.624724000      3.560568000
H        1.185114000     -3.336281000      2.534809000
C        1.143160000     -2.372969000      4.456755000
H        0.380381000     -1.631009000      4.244601000
H        2.116120000     -1.923499000      4.283270000
H        1.075464000     -2.634681000      5.507550000
C        1.991111000     -4.712102000      3.964425000
H        1.809351000     -5.063079000      4.975271000
H        2.996815000     -4.305461000      3.922672000
H        1.944942000     -5.564126000      3.294589000
C       -3.993631000      2.759542000     -0.113265000
C       -5.305016000      3.530099000     -0.102237000
C       -5.661357000      4.367840000     -1.156258000
H       -4.991930000      4.491104000     -1.994466000
C       -6.863118000      5.057018000     -1.132339000
H       -7.123828000      5.709011000     -1.956051000
C       -7.727403000      4.912605000     -0.057667000
H       -8.667585000      5.449874000     -0.040537000
C       -7.384352000      4.076694000      0.994098000
H       -8.056223000      3.955067000      1.833966000
C       -6.180251000      3.391920000      0.972300000
H       -5.922868000      2.733298000      1.788569000
C       -4.290163000      1.879179000     -2.419569000
C       -3.826605000      2.498409000     -3.599742000
C       -4.518622000      2.298223000     -4.788641000
H       -4.168356000      2.776437000     -5.692609000
C       -5.644308000      1.500460000     -4.840799000
H       -6.169410000      1.356831000     -5.775941000
C       -6.086518000      0.878815000     -3.689950000
H       -6.957889000      0.240740000     -3.735393000
C       -5.430821000      1.051405000     -2.476856000
C       -2.562436000      3.379077000     -3.639452000
H       -2.141108000      3.418748000     -2.637369000
C       -1.493871000      2.770141000     -4.581163000
H       -1.250838000      1.754866000     -4.284943000
H       -0.585452000      3.363936000     -4.549219000
H       -1.846128000      2.750299000     -5.607261000
C       -2.869022000      4.836247000     -4.068955000
H       -3.283818000      4.870056000     -5.071237000
H       -1.954702000      5.422329000     -4.061693000
H       -3.574820000      5.306914000     -3.393001000
C       -5.954932000      0.278812000     -1.252130000
H       -5.385535000      0.585976000     -0.379832000
C       -7.447587000      0.574254000     -0.962972000
H       -8.083427000      0.196510000     -1.756688000
H       -7.620355000      1.640922000     -0.866362000
H       -7.746345000      0.094187000     -0.035754000
C       -5.734099000     -1.242630000     -1.436944000
H       -6.303601000     -1.617825000     -2.281290000
H       -6.051196000     -1.777332000     -0.547282000
H       -4.683970000     -1.457473000     -1.610747000
C       -3.268515000      3.506139000      2.149539000
C       -2.970507000      4.886163000      2.107170000
C       -2.986831000      5.620131000      3.287754000
H       -2.759026000      6.676401000      3.256538000
C       -3.278890000      5.029834000      4.500984000
H       -3.280553000      5.618389000      5.408910000
C       -3.567942000      3.680249000      4.543333000
H       -3.795902000      3.218005000      5.493559000
C       -3.574858000      2.905650000      3.389842000
C       -2.605181000      5.629454000      0.806497000
H       -2.631246000      4.921383000     -0.017642000
C       -3.618221000      6.759434000      0.491800000
H       -4.633551000      6.379048000      0.472585000
H       -3.397921000      7.197301000     -0.477320000
H       -3.564280000      7.546303000      1.236962000
C       -1.172171000      6.215527000      0.866997000
H       -1.093734000      6.975135000      1.637827000
H       -0.918744000      6.672504000     -0.084994000
H       -0.444225000      5.439408000      1.076573000
C       -3.909400000      1.407376000      3.521606000
H       -3.967801000      0.985539000      2.522379000
C       -2.799998000      0.652301000      4.294489000
H       -2.738861000      1.000090000      5.320926000
H       -1.831847000      0.803976000      3.829242000
H       -3.010249000     -0.413068000      4.308223000
C       -5.277812000      1.164292000      4.208050000
H       -5.513709000      0.104303000      4.190175000
H       -6.075869000      1.697094000      3.701851000
H       -5.260825000      1.486903000      5.243788000
N        1.331007000      1.751901000     -2.693648000
H        0.964765000      2.698534000     -2.813828000
H        0.277396000      0.915086000     -2.423320000
H        1.842640000      1.517697000     -3.548477000
242
B'N
Y        2.083251000      0.352119000     -0.684292000
Y       -0.770255000     -1.718554000     -0.106962000
Y       -1.195121000      1.556706000     -0.039848000
N        4.456215000      0.564527000     -1.089901000
N        3.902023000      0.564537000      1.101809000
N       -1.379578000     -3.868640000     -1.000727000
N       -1.789018000     -3.500354000      1.194065000
N       -2.844728000      2.862790000     -1.218489000
N       -2.381769000      3.397510000      0.935235000
C       -0.892527000     -0.023145000     -1.999266000
H       -1.958734000     -0.070059000     -2.297064000
H       -0.368260000     -0.795034000     -2.592891000
C        0.339785000      0.005526000      1.483178000
H        0.100972000     -0.922913000      2.050974000
H        1.409538000      0.159814000      1.726478000
H       -0.163819000      0.773076000      2.108968000
C       -2.707560000     -0.335764000      0.722183000
H       -3.399830000      0.528381000      0.756206000
H       -3.279822000     -1.078827000      0.131012000
H       -2.685281000     -0.725224000      1.755385000
C        0.994491000      2.654701000     -0.191223000
H        0.585565000      3.370573000     -0.929443000
H        0.717727000      3.049099000      0.809803000
H        2.083478000      2.841847000     -0.239771000
C        1.592873000     -2.186158000     -0.665911000
H        1.325896000     -2.630561000     -1.642236000
H        1.443225000     -2.994564000      0.082678000
H        2.696559000     -2.101345000     -0.701833000
C        4.897461000      0.665426000      0.183934000
C        6.363414000      0.885266000      0.535015000
C        7.354940000      0.079220000     -0.017063000
H        7.079321000     -0.724606000     -0.683258000
C        8.688496000      0.289310000      0.294958000
H        9.448249000     -0.349126000     -0.137273000
C        9.048057000      1.313543000      1.157607000
H       10.090431000      1.479517000      1.399466000
C        8.068139000      2.125173000      1.708196000
H        8.341789000      2.929570000      2.378793000
C        6.734557000      1.910029000      1.399907000
H        5.974258000      2.550122000      1.820875000
C        5.238512000      0.859629000     -2.268936000
C        5.621098000     -0.187559000     -3.134624000
C        6.286281000      0.116011000     -4.316090000
H        6.574692000     -0.683778000     -4.983719000
C        6.586363000      1.420910000     -4.656885000
H        7.106020000      1.637873000     -5.580815000
C        6.210876000      2.446172000     -3.811641000
H        6.437184000      3.467187000     -4.085694000
C        5.537348000      2.192035000     -2.622513000
C        5.302439000     -1.662984000     -2.824733000
H        4.901338000     -1.712072000     -1.815428000
C        4.227078000     -2.217705000     -3.791237000
H        3.323070000     -1.620716000     -3.741459000
H        3.978095000     -3.240680000     -3.525783000
H        4.588909000     -2.210777000     -4.814761000
C        6.561729000     -2.566112000     -2.876818000
H        6.311269000     -3.565655000     -2.533714000
H        7.356216000     -2.180968000     -2.246526000
H        6.944842000     -2.646423000     -3.888726000
C        5.102569000      3.389603000     -1.756552000
H        4.648303000      3.007602000     -0.846617000
C        6.303837000      4.274781000     -1.340805000
H        6.753128000      4.756257000     -2.203131000
H        7.066509000      3.683256000     -0.844934000
H        5.974020000      5.050495000     -0.655916000
C        4.031216000      4.239761000     -2.483231000
H        4.433474000      4.682353000     -3.389022000
H        3.687501000      5.041414000     -1.836178000
H        3.176487000      3.626343000     -2.751929000
C        4.164482000      0.340986000      2.509598000
C        3.847461000      1.331017000      3.464455000
C        4.038798000      1.064979000      4.815744000
H        3.793483000      1.824723000      5.544550000
C        4.535076000     -0.147792000      5.248410000
H        4.677031000     -0.336196000      6.304275000
C        4.843922000     -1.120198000      4.317581000
H        5.224271000     -2.073495000      4.656905000
C        4.669967000     -0.901328000      2.957044000
C        3.264828000      2.703918000      3.076265000
H        3.221833000      2.757476000      1.991270000
C        1.825853000      2.867765000      3.626637000
H        1.198679000      2.040149000      3.317338000
H        1.384926000      3.791410000      3.263655000
H        1.828958000      2.900499000      4.711327000
C        4.133302000      3.886436000      3.577896000
H        4.143535000      3.929638000      4.662028000
H        3.726679000      4.823386000      3.208520000
H        5.158927000      3.805671000      3.236101000
C        5.000298000     -2.058154000      1.993176000
H        4.890611000     -1.701957000      0.973476000
C        6.455557000     -2.562745000      2.158831000
H        7.162137000     -1.744119000      2.073584000
H        6.684054000     -3.293483000      1.388522000
H        6.598773000     -3.036767000      3.124114000
C        4.007065000     -3.231445000      2.177606000
H        4.098075000     -3.665408000      3.168238000
H        4.203796000     -4.009285000      1.445714000
H        2.985656000     -2.889080000      2.046634000
C       -1.855802000     -4.386607000      0.162431000
C       -2.394545000     -5.801866000      0.297182000
C       -3.216126000     -6.347366000     -0.687312000
H       -3.483569000     -5.757403000     -1.551160000
C       -3.705615000     -7.637438000     -0.563085000
H       -4.346791000     -8.044228000     -1.334395000
C       -3.376477000     -8.403022000      0.545188000
H       -3.757606000     -9.412218000      0.641450000
C       -2.556856000     -7.871613000      1.529389000
H       -2.292195000     -8.464242000      2.395565000
C       -2.071270000     -6.579982000      1.407069000
H       -1.427556000     -6.177780000      2.175031000
C       -1.182661000     -4.603048000     -2.233509000
C       -1.951978000     -4.258557000     -3.366436000
C       -1.733921000     -4.927684000     -4.565006000
H       -2.328854000     -4.672148000     -5.430571000
C       -0.773900000     -5.913966000     -4.673911000
H       -0.618335000     -6.423663000     -5.615608000
C       -0.009614000     -6.238531000     -3.570800000
H        0.748730000     -7.003594000     -3.661200000
C       -0.191387000     -5.602740000     -2.348163000
C       -3.034406000     -3.160450000     -3.340621000
H       -3.015635000     -2.681073000     -2.363467000
C       -4.458790000     -3.738425000     -3.538507000
H       -4.540879000     -4.253671000     -4.490375000
H       -5.188944000     -2.934613000     -3.523639000
H       -4.712946000     -4.437655000     -2.749126000
C       -2.760541000     -2.070286000     -4.407138000
H       -2.895146000     -2.463099000     -5.409453000
H       -1.747131000     -1.691889000     -4.324418000
H       -3.448349000     -1.240288000     -4.275927000
C        0.726121000     -6.017438000     -1.180160000
H        0.449307000     -5.443275000     -0.299765000
C        0.571384000     -7.520227000     -0.833767000
H       -0.466737000     -7.776171000     -0.653966000
H        1.142034000     -7.755556000      0.059725000
H        0.939708000     -8.143608000     -1.641836000
C        2.211861000     -5.704741000     -1.489012000
H        2.564630000     -6.287980000     -2.333238000
H        2.827650000     -5.948244000     -0.628352000
H        2.346762000     -4.653580000     -1.719107000
C       -2.378924000     -3.705307000      2.501464000
C       -3.779758000     -3.756235000      2.679320000
C       -4.297160000     -3.914853000      3.959533000
H       -5.368758000     -3.955697000      4.095079000
C       -3.474631000     -4.017986000      5.063270000
H       -3.897578000     -4.144766000      6.051060000
C       -2.106700000     -3.947605000      4.893025000
H       -1.462669000     -4.020283000      5.758057000
C       -1.539672000     -3.787486000      3.634071000
C       -4.783991000     -3.611083000      1.518636000
H       -4.230404000     -3.507021000      0.588937000
C       -5.702191000     -4.852877000      1.388816000
H       -5.120165000     -5.764658000      1.316599000
H       -6.317606000     -4.767781000      0.498084000
H       -6.361693000     -4.938134000      2.246113000
C       -5.651817000     -2.338693000      1.687810000
H       -6.262835000     -2.401342000      2.582245000
H       -6.313326000     -2.225776000      0.834357000
H       -5.029896000     -1.452806000      1.759962000
C       -0.003381000     -3.696499000      3.548273000
H        0.272569000     -3.497613000      2.514812000
C        0.537065000     -2.533315000      4.418822000
H        0.006936000     -1.610490000      4.207377000
H        1.592510000     -2.375095000      4.220251000
H        0.422529000     -2.753153000      5.475064000
C        0.684917000     -5.022820000      3.958850000
H        0.428782000     -5.295409000      4.977762000
H        1.763396000     -4.913948000      3.897751000
H        0.391852000     -5.836659000      3.304239000
C       -3.130706000      3.675050000     -0.168099000
C       -4.208294000      4.746333000     -0.185781000
C       -4.335688000      5.636205000     -1.249573000
H       -3.648875000      5.583480000     -2.081134000
C       -5.331123000      6.600124000     -1.244458000
H       -5.414213000      7.289122000     -2.075102000
C       -6.216459000      6.681664000     -0.180379000
H       -6.995652000      7.433912000     -0.178423000
C       -6.102424000      5.795328000      0.880064000
H       -6.793792000      5.849221000      1.711136000
C       -5.103487000      4.835732000      0.877892000
H       -5.026144000      4.139784000      1.700335000
C       -3.548892000      2.888463000     -2.487136000
C       -2.888516000      3.371066000     -3.636961000
C       -3.556949000      3.361329000     -4.855650000
H       -3.056341000      3.737118000     -5.737032000
C       -4.846634000      2.879569000     -4.965404000
H       -5.350007000      2.879892000     -5.923321000
C       -5.483300000      2.386616000     -3.843757000
H       -6.486345000      1.993976000     -3.934705000
C       -4.858963000      2.380845000     -2.601915000
C       -1.437966000      3.891715000     -3.609785000
H       -1.050376000      3.767591000     -2.602049000
C       -0.533531000      3.076259000     -4.567868000
H       -0.652050000      2.011329000     -4.398970000
H        0.508585000      3.335365000     -4.406090000
H       -0.777694000      3.283363000     -5.604776000
C       -1.341723000      5.398609000     -3.957469000
H       -1.736686000      5.596891000     -4.948836000
H       -0.302835000      5.714497000     -3.937089000
H       -1.890580000      6.004307000     -3.244392000
C       -5.616033000      1.767154000     -1.409301000
H       -5.020582000      1.909198000     -0.512004000
C       -6.988247000      2.444823000     -1.171313000
H       -7.667443000      2.255260000     -1.995790000
H       -6.876719000      3.518351000     -1.061537000
H       -7.441549000      2.053681000     -0.265233000
C       -5.797269000      0.242054000     -1.607884000
H       -6.414071000      0.033982000     -2.476366000
H       -6.276344000     -0.194584000     -0.737237000
H       -4.835395000     -0.241505000     -1.748913000
C       -2.270786000      4.242397000      2.108530000
C       -1.613313000      5.490948000      2.045323000
C       -1.439970000      6.224128000      3.213591000
H       -0.936880000      7.179867000      3.168047000
C       -1.886600000      5.755477000      4.433184000
H       -1.734631000      6.339211000      5.331529000
C       -2.528687000      4.534632000      4.494782000
H       -2.878002000      4.168490000      5.449973000
C       -2.737733000      3.769882000      3.353458000
C       -1.054923000      6.084335000      0.736155000
H       -1.265653000      5.394952000     -0.077101000
C       -1.727209000      7.437851000      0.392741000
H       -2.807097000      7.340908000      0.365478000
H       -1.389470000      7.784487000     -0.579458000
H       -1.472266000      8.194519000      1.127439000
C        0.482545000      6.263735000      0.800530000
H        0.759798000      6.986081000      1.561240000
H        0.853596000      6.619834000     -0.155886000
H        0.973580000      5.323495000      1.027008000
C       -3.467784000      2.421401000      3.501863000
H       -3.659169000      2.029979000      2.506777000
C       -2.592089000      1.392635000      4.258466000
H       -2.410401000      1.715960000      5.278653000
H       -1.631025000      1.268549000      3.769548000
H       -3.087525000      0.426743000      4.289899000
C       -4.837964000      2.564744000      4.212067000
H       -5.361749000      1.613522000      4.193313000
H       -5.461633000      3.305076000      3.721834000
H       -4.715312000      2.859643000      5.248859000
N        2.048634000      0.626810000     -2.844304000
H        2.909751000      0.844568000     -3.352495000
H       -0.503104000      0.911515000     -2.446804000
H        1.297611000      0.608717000     -3.537777000
242
D'N
Y        0.740085000      1.777338000     -0.017117000
Y        1.283944000     -1.525297000     -0.070645000
Y       -2.069034000     -0.383970000     -0.642215000
N        1.155081000      3.977819000     -0.906879000
N        1.702876000      3.618785000      1.255313000
N        3.107252000     -2.673552000     -1.184812000
N        2.419940000     -3.452481000      0.824719000
N       -4.426626000     -0.671135000     -1.119624000
N       -3.869465000     -0.798293000      1.066123000
C       -1.828449000     -0.656120000     -3.036559000
H       -2.853401000     -0.745834000     -3.438571000
H       -1.322919000     -1.601356000     -3.307107000
C       -0.347758000     -0.080651000      1.487943000
H        0.203821000     -0.842041000      2.079002000
H       -0.155598000      0.836354000      2.090151000
H       -1.403334000     -0.302634000      1.744977000
C       -0.884949000     -2.659200000     -0.406423000
H       -1.956473000     -2.926075000     -0.480667000
H       -0.429065000     -3.223706000     -1.243455000
H       -0.572722000     -3.176349000      0.524925000
C       -1.669078000      2.141286000     -0.586618000
H       -1.458060000      2.559688000     -1.587924000
H       -2.773028000      2.046582000     -0.549995000
H       -1.494707000      2.975878000      0.125564000
C        2.686103000      0.405706000      0.847020000
H        3.296513000      1.097163000      0.230831000
H        3.373155000     -0.449897000      1.004866000
H        2.610496000      0.878944000      1.844299000
C        1.664812000      4.514645000      0.231750000
C        2.137589000      5.954832000      0.345047000
C        2.902866000      6.528973000     -0.668015000
H        3.171946000      5.943337000     -1.534861000
C        3.334833000      7.841525000     -0.567628000
H        3.932779000      8.271720000     -1.360682000
C        3.003652000      8.599702000      0.545186000
H        3.339767000      9.626319000      0.622944000
C        2.240286000      8.038849000      1.557966000
H        1.975036000      8.625858000      2.427795000
C        1.811847000      6.725033000      1.459632000
H        1.211088000      6.299309000      2.249924000
C        0.867388000      4.697277000     -2.129158000
C        1.595052000      4.379624000     -3.296106000
C        1.281818000      5.019025000     -4.489485000
H        1.841615000      4.779168000     -5.382682000
C        0.270030000      5.956166000     -4.558007000
H        0.039633000      6.444247000     -5.495801000
C       -0.448608000      6.260154000     -3.418815000
H       -1.245832000      6.987961000     -3.476882000
C       -0.173494000      5.648877000     -2.201106000
C        2.728664000      3.335734000     -3.310270000
H        2.817644000      2.912828000     -2.311264000
C        2.410548000      2.178676000     -4.290049000
H        1.427804000      1.763100000     -4.090420000
H        3.149017000      1.388325000     -4.189349000
H        2.426937000      2.524318000     -5.318402000
C        4.100815000      3.963649000     -3.662847000
H        4.872320000      3.199340000     -3.646067000
H        4.374200000      4.734179000     -2.949618000
H        4.084669000      4.406784000     -4.653457000
C       -1.045498000      6.034547000     -0.989388000
H       -0.692919000      5.486304000     -0.119614000
C       -0.945724000      7.547606000     -0.668640000
H       -1.388189000      8.141331000     -1.461704000
H        0.087138000      7.855520000     -0.550251000
H       -1.476698000      7.767726000      0.252768000
C       -2.528495000      5.645669000     -1.212212000
H       -2.954771000      6.197910000     -2.043252000
H       -3.108549000      5.871770000     -0.322404000
H       -2.622494000      4.585842000     -1.421790000
C        2.309555000      3.866010000      2.546677000
C        1.494775000      3.890246000      3.698855000
C        2.078651000      4.095694000      4.943473000
H        1.452448000      4.123664000      5.824109000
C        3.441630000      4.266356000      5.079474000
H        3.878239000      4.427231000      6.056309000
C        4.242847000      4.217457000      3.956177000
H        5.311952000      4.333819000      4.065378000
C        3.706456000      4.016996000      2.689932000
C       -0.031094000      3.682220000      3.647601000
H       -0.315486000      3.473908000      2.617940000
C       -0.456256000      2.469012000      4.513283000
H        0.129408000      1.590318000      4.262437000
H       -1.504794000      2.239878000      4.350774000
H       -0.316471000      2.676822000      5.568944000
C       -0.808678000      4.947612000      4.088855000
H       -0.558739000      5.223193000      5.108483000
H       -1.877253000      4.761865000      4.039752000
H       -0.583372000      5.789783000      3.443008000
C        4.685485000      3.926083000      1.503497000
H        4.112730000      3.792660000      0.589113000
C        5.536108000      5.211978000      1.348826000
H        4.907039000      6.093174000      1.292192000
H        6.130482000      5.156486000      0.441620000
H        6.213787000      5.331767000      2.187596000
C        5.616982000      2.697476000      1.651303000
H        6.249763000      2.793388000      2.527548000
H        6.257347000      2.610188000      0.779068000
H        5.038321000      1.784575000      1.746179000
C        3.273410000     -3.617140000     -0.222023000
C        4.310338000     -4.726641000     -0.282724000
C        4.503233000     -5.471157000     -1.444130000
H        3.902735000     -5.268631000     -2.318589000
C        5.451147000     -6.480906000     -1.483381000
H        5.585932000     -7.054827000     -2.391141000
C        6.222618000     -6.755639000     -0.364310000
H        6.964755000     -7.543801000     -0.396201000
C        6.041502000     -6.017077000      0.795253000
H        6.643400000     -6.222847000      1.671003000
C        5.090121000     -5.010905000      0.836100000
H        4.961322000     -4.431887000      1.738679000
C        3.951510000     -2.550372000     -2.357457000
C        3.416485000     -2.827909000     -3.632844000
C        4.223146000     -2.674970000     -4.754903000
H        3.817605000     -2.895455000     -5.732335000
C        5.531630000     -2.247728000     -4.648870000
H        6.143378000     -2.135192000     -5.534281000
C        6.048356000     -1.955772000     -3.402185000
H        7.067987000     -1.606102000     -3.321313000
C        5.283731000     -2.098224000     -2.250668000
C        1.959117000     -3.279960000     -3.849269000
H        1.459481000     -3.305190000     -2.883471000
C        1.866831000     -4.704270000     -4.452641000
H        2.348823000     -4.749711000     -5.424036000
H        0.824784000     -4.983181000     -4.578211000
H        2.335532000     -5.437871000     -3.805323000
C        1.196308000     -2.277386000     -4.749900000
H        1.618193000     -2.251651000     -5.749266000
H        1.241268000     -1.275563000     -4.335666000
H        0.153160000     -2.565737000     -4.830058000
C        5.922239000     -1.704391000     -0.905506000
H        5.219344000     -1.930189000     -0.108512000
C        7.225875000     -2.491400000     -0.621340000
H        7.057961000     -3.560706000     -0.690244000
H        7.584248000     -2.265002000      0.378529000
H        8.005637000     -2.223179000     -1.326347000
C        6.199886000     -0.181955000     -0.859300000
H        6.924145000      0.104395000     -1.615147000
H        6.594801000      0.095681000      0.112814000
H        5.286806000      0.379338000     -1.031935000
C        2.218173000     -4.389677000      1.911163000
C        1.565021000     -5.624051000      1.704244000
C        1.301470000     -6.441307000      2.797893000
H        0.801678000     -7.387255000      2.642684000
C        1.656021000     -6.069170000      4.079311000
H        1.434769000     -6.717334000      4.917039000
C        2.297933000     -4.862908000      4.281234000
H        2.577614000     -4.573875000      5.284678000
C        2.594622000     -4.017267000      3.219755000
C        1.115876000     -6.114618000      0.313179000
H        1.378056000     -5.358629000     -0.422853000
C        1.834605000     -7.429515000     -0.082742000
H        2.911531000     -7.320777000     -0.016583000
H        1.579367000     -7.700387000     -1.102978000
H        1.534725000     -8.244637000      0.567743000
C       -0.418450000     -6.317237000      0.241659000
H       -0.739721000     -7.105958000      0.913949000
H       -0.707525000     -6.594651000     -0.767651000
H       -0.944115000     -5.406719000      0.507687000
C        3.324369000     -2.693366000      3.518143000
H        3.576381000     -2.227075000      2.569550000
C        2.415986000     -1.715387000      4.302850000
H        1.481673000     -1.547988000      3.776739000
H        2.914004000     -0.758570000      4.429111000
H        2.180951000     -2.109939000      5.286413000
C        4.650044000     -2.910084000      4.291267000
H        4.465949000     -3.298968000      5.287235000
H        5.174996000     -1.964594000      4.391329000
H        5.301094000     -3.605484000      3.771778000
C       -4.864282000     -0.867514000      0.142796000
C       -6.320241000     -1.153465000      0.485001000
C       -7.335193000     -0.311563000      0.039481000
H       -7.086736000      0.565379000     -0.539943000
C       -8.658793000     -0.581471000      0.348123000
H       -9.437920000      0.084542000      0.000165000
C       -8.983814000     -1.700578000      1.099546000
H      -10.018510000     -1.912773000      1.338321000
C       -7.979738000     -2.547715000      1.542753000
H       -8.226822000     -3.425657000      2.125721000
C       -6.655944000     -2.273647000      1.238878000
H       -5.876370000     -2.940806000      1.574789000
C       -5.227939000     -0.905366000     -2.303648000
C       -5.673863000      0.187902000     -3.074476000
C       -6.365605000     -0.051293000     -4.255479000
H       -6.701734000      0.784136000     -4.853325000
C       -6.630625000     -1.337698000     -4.683928000
H       -7.171437000     -1.504894000     -5.606118000
C       -6.191988000     -2.408266000     -3.930192000
H       -6.389647000     -3.413751000     -4.274599000
C       -5.490076000     -2.217960000     -2.745603000
C       -5.387539000      1.645697000     -2.666929000
H       -4.995775000      1.638933000     -1.652631000
C       -4.313538000      2.275878000     -3.587504000
H       -3.398740000      1.693274000     -3.565601000
H       -4.087518000      3.287218000     -3.263449000
H       -4.665234000      2.318266000     -4.613590000
C       -6.661493000      2.529078000     -2.670037000
H       -7.032293000      2.680056000     -3.678310000
H       -6.433448000      3.503741000     -2.248603000
H       -7.457016000      2.083056000     -2.082348000
C       -4.978552000     -3.458851000     -1.989645000
H       -4.528379000     -3.131405000     -1.056492000
C       -6.121956000     -4.440900000     -1.632565000
H       -6.558214000     -4.876675000     -2.525241000
H       -6.907976000     -3.935423000     -1.081049000
H       -5.737987000     -5.249159000     -1.017012000
C       -3.877773000     -4.183328000     -2.803445000
H       -4.276842000     -4.573381000     -3.734372000
H       -3.473782000     -5.013703000     -2.231675000
H       -3.067392000     -3.500278000     -3.039606000
C       -4.128291000     -0.689534000      2.488587000
C       -4.647508000      0.507005000      3.032254000
C       -4.807873000      0.619980000      4.407343000
H       -5.197416000      1.538989000      4.822356000
C       -4.472637000     -0.415243000      5.258020000
H       -4.602879000     -0.308677000      6.326812000
C       -3.966671000     -1.585545000      4.729679000
H       -3.702221000     -2.394449000      5.396213000
C       -3.789384000     -1.746031000      3.359925000
C       -5.006932000      1.725813000      2.159820000
H       -4.916472000      1.443176000      1.115452000
C       -6.462840000      2.202762000      2.388725000
H       -7.163356000      1.384546000      2.259410000
H       -6.712957000      2.983252000      1.676096000
H       -6.591318000      2.606461000      3.387438000
C       -4.018686000      2.891799000      2.406445000
H       -4.089043000      3.250308000      3.428426000
H       -4.238926000      3.719640000      1.738903000
H       -2.997803000      2.569588000      2.226812000
C       -3.198434000     -3.077764000      2.858343000
H       -3.197178000     -3.058411000      1.771114000
C       -1.736065000     -3.248361000      3.339722000
H       -1.693068000     -3.331377000      4.420908000
H       -1.132682000     -2.398329000      3.043508000
H       -1.300035000     -4.147477000      2.914920000
C       -4.028354000     -4.306452000      3.311937000
H       -3.638650000     -5.206062000      2.844573000
H       -5.073005000     -4.207842000      3.038699000
H       -3.974196000     -4.437520000      4.387602000
N        0.995288000      0.158358000     -1.691697000
H        0.248422000      0.054337000     -2.394680000
H       -1.350523000      0.129346000     -3.657872000
H        1.875494000      0.219806000     -2.219463000
242
TS4'N, Imaginary frequency = i1129.77 cm-1
Y        0.064726000      1.817522000      0.018212000
Y        1.657452000     -1.111801000     -0.065921000
Y       -1.735620000     -1.002898000     -0.511235000
N       -0.284818000      3.997828000     -0.947319000
N        0.550413000      3.939357000      1.152225000
N        3.645331000     -1.750978000     -1.287242000
N        3.513625000     -2.382851000      0.891413000
N       -3.920327000     -1.924757000     -1.012751000
N       -3.362864000     -1.883117000      1.182654000
C       -1.510658000     -1.281434000     -3.051844000
H       -1.432197000     -2.379951000     -3.021513000
H       -0.952398000     -0.960944000     -3.945475000
C       -0.259914000     -0.239947000      1.629007000
H        0.537687000     -0.796098000      2.166149000
H       -0.302363000      0.706652000      2.214261000
H       -1.181862000     -0.757393000      1.957659000
C       -0.050196000     -2.914146000     -0.232886000
H       -0.995333000     -3.487703000     -0.273806000
H        0.541289000     -3.328680000     -1.073699000
H        0.423647000     -3.284937000      0.697997000
C       -2.396753000      1.419705000     -0.198967000
H       -2.557294000      1.832653000     -1.211498000
H       -3.333608000      0.898503000      0.072178000
H       -2.407549000      2.295812000      0.481008000
C        2.424662000      1.202197000      0.689695000
H        2.695706000      2.062090000      0.044811000
H        3.371494000      0.632953000      0.753236000
H        2.289419000      1.621123000      1.704524000
C        0.156651000      4.723478000      0.116442000
C        0.219714000      6.242875000      0.126046000
C        0.705837000      6.930557000     -0.984044000
H        1.042258000      6.379816000     -1.850372000
C        0.775002000      8.314231000     -0.982169000
H        1.159474000      8.833609000     -1.850486000
C        0.355068000      9.029989000      0.128763000
H        0.407467000     10.111719000      0.130030000
C       -0.132117000      8.355657000      1.238174000
H       -0.464523000      8.908068000      2.107596000
C       -0.197521000      6.971683000      1.238002000
H       -0.585615000      6.456544000      2.104543000
C       -0.911904000      4.535020000     -2.135017000
C       -0.277468000      4.359939000     -3.383830000
C       -0.903041000      4.817317000     -4.537536000
H       -0.414041000      4.687328000     -5.492865000
C       -2.136619000      5.435112000     -4.489231000
H       -2.609040000      5.785239000     -5.397455000
C       -2.764598000      5.594971000     -3.269850000
H       -3.735300000      6.069476000     -3.235360000
C       -2.180395000      5.156208000     -2.087656000
C        1.089243000      3.663817000     -3.532492000
H        1.415667000      3.333958000     -2.547664000
C        0.983598000      2.413574000     -4.441497000
H        0.174885000      1.766591000     -4.115960000
H        1.911756000      1.849887000     -4.414003000
H        0.792808000      2.696641000     -5.471419000
C        2.179301000      4.621519000     -4.076302000
H        3.127269000      4.097350000     -4.153970000
H        2.317423000      5.472236000     -3.417253000
H        1.915925000      4.993138000     -5.061455000
C       -2.972960000      5.355119000     -0.779808000
H       -2.375681000      4.984291000      0.048849000
C       -3.276522000      6.851766000     -0.514400000
H       -3.970673000      7.242468000     -1.251080000
H       -2.371497000      7.447666000     -0.551775000
H       -3.725375000      6.971463000      0.467224000
C       -4.296989000      4.550558000     -0.790297000
H       -4.957668000      4.898630000     -1.577544000
H       -4.810017000      4.669808000      0.159400000
H       -4.106616000      3.494262000     -0.945071000
C        1.129789000      4.420582000      2.387839000
C        0.402520000      4.271096000      3.588877000
C        0.964518000      4.700279000      4.785013000
H        0.402806000      4.594692000      5.702564000
C        2.225836000      5.260605000      4.826552000
H        2.646726000      5.591563000      5.766762000
C        2.948683000      5.382653000      3.656911000
H        3.942723000      5.805856000      3.693032000
C        2.429052000      4.970039000      2.435369000
C       -0.998565000      3.631705000      3.638978000
H       -1.256596000      3.293596000      2.637547000
C       -1.015436000      2.396494000      4.574544000
H       -0.216454000      1.707461000      4.319685000
H       -1.961684000      1.871725000      4.486159000
H       -0.888896000      2.691018000      5.611114000
C       -2.089048000      4.642717000      4.073599000
H       -1.885455000      5.034195000      5.065312000
H       -3.059207000      4.155202000      4.093519000
H       -2.145415000      5.477128000      3.382297000
C        3.328587000      5.100407000      1.191138000
H        2.773754000      4.750222000      0.323983000
C        3.747408000      6.568767000      0.927285000
H        2.881210000      7.218478000      0.871742000
H        4.287772000      6.637493000     -0.012222000
H        4.396500000      6.934615000      1.716022000
C        4.590840000      4.212520000      1.328197000
H        5.196335000      4.526284000      2.172151000
H        5.198026000      4.288530000      0.431533000
H        4.317047000      3.172341000      1.471759000
C        4.269352000     -2.346841000     -0.237841000
C        5.700762000     -2.859568000     -0.292465000
C        6.125245000     -3.741437000     -1.282194000
H        5.424620000     -4.095502000     -2.023670000
C        7.439007000     -4.181757000     -1.314063000
H        7.754450000     -4.872262000     -2.085667000
C        8.345030000     -3.739895000     -0.362220000
H        9.372018000     -4.082483000     -0.389553000
C        7.932400000     -2.856426000      0.623873000
H        8.635806000     -2.503386000      1.367006000
C        6.617803000     -2.420997000      0.659513000
H        6.302520000     -1.723194000      1.421756000
C        4.253111000     -1.577312000     -2.595632000
C        3.874060000     -2.433896000     -3.651466000
C        4.392182000     -2.217329000     -4.921282000
H        4.095225000     -2.864522000     -5.734459000
C        5.282066000     -1.188416000     -5.167208000
H        5.677638000     -1.035793000     -6.162843000
C        5.657644000     -0.355574000     -4.133326000
H        6.348928000      0.452241000     -4.328736000
C        5.156921000     -0.528847000     -2.846876000
C        2.870270000     -3.584452000     -3.448796000
H        2.710995000     -3.707557000     -2.380555000
C        3.381704000     -4.938938000     -4.000584000
H        3.465279000     -4.918310000     -5.081970000
H        2.684692000     -5.727944000     -3.733958000
H        4.353630000     -5.193685000     -3.591024000
C        1.508711000     -3.232615000     -4.094451000
H        1.607049000     -3.131954000     -5.170840000
H        1.130107000     -2.296070000     -3.699185000
H        0.780055000     -4.010914000     -3.889384000
C        5.581881000      0.470787000     -1.756892000
H        5.139669000      0.158940000     -0.814889000
C        7.117745000      0.507049000     -1.561862000
H        7.503163000     -0.484616000     -1.348579000
H        7.370292000      1.158129000     -0.730081000
H        7.617196000      0.883776000     -2.448346000
C        5.043333000      1.885886000     -2.079973000
H        5.480671000      2.268665000     -2.996565000
H        5.284371000      2.572515000     -1.275219000
H        3.964346000      1.863845000     -2.200873000
C        3.832051000     -3.176481000      2.063158000
C        3.727514000     -4.585018000      2.027814000
C        3.932697000     -5.310780000      3.194965000
H        3.849428000     -6.388302000      3.169476000
C        4.230349000     -4.685938000      4.389900000
H        4.379921000     -5.268919000      5.289073000
C        4.333878000     -3.309813000      4.425026000
H        4.565552000     -2.820981000      5.360846000
C        4.147457000     -2.540976000      3.282213000
C        3.367117000     -5.367406000      0.749157000
H        3.270129000     -4.663416000     -0.072398000
C        4.472102000     -6.385286000      0.369246000
H        5.439628000     -5.900347000      0.297306000
H        4.244372000     -6.839992000     -0.590352000
H        4.542583000     -7.176571000      1.108191000
C        2.007911000     -6.096405000      0.892801000
H        2.047246000     -6.844088000      1.678312000
H        1.753513000     -6.595056000     -0.037789000
H        1.215737000     -5.394386000      1.129769000
C        4.274812000     -1.011030000      3.403887000
H        4.247500000     -0.590797000      2.402972000
C        3.089313000     -0.415795000      4.202647000
H        2.141578000     -0.698864000      3.756055000
H        3.151040000      0.668385000      4.217463000
H        3.097427000     -0.771929000      5.228111000
C        5.613528000     -0.576075000      4.052710000
H        5.655934000     -0.862890000      5.098076000
H        5.714274000      0.503897000      3.997140000
H        6.462122000     -1.023435000      3.545677000
C       -4.290301000     -2.237285000      0.252805000
C       -5.605141000     -2.928538000      0.588353000
C       -6.804044000     -2.479208000      0.042250000
H       -6.803768000     -1.618953000     -0.609251000
C       -7.998434000     -3.114492000      0.341844000
H       -8.922821000     -2.749237000     -0.086731000
C       -8.008785000     -4.212528000      1.188146000
H       -8.941675000     -4.710811000      1.420945000
C       -6.819692000     -4.670278000      1.735097000
H       -6.818919000     -5.529039000      2.393956000
C       -5.627156000     -4.030779000      1.438424000
H       -4.703325000     -4.396680000      1.859297000
C       -4.618101000     -2.348167000     -2.211034000
C       -5.304384000     -1.394505000     -2.994884000
C       -5.871287000     -1.789225000     -4.200567000
H       -6.390955000     -1.059982000     -4.806166000
C       -5.787154000     -3.095399000     -4.642165000
H       -6.235342000     -3.383196000     -5.584031000
C       -5.128225000     -4.030549000     -3.869447000
H       -5.064739000     -5.052578000     -4.216172000
C       -4.537647000     -3.683209000     -2.659769000
C       -5.456753000      0.079827000     -2.566593000
H       -5.046960000      0.184660000     -1.565015000
C       -4.679368000      1.037835000     -3.503876000
H       -3.619937000      0.808010000     -3.511784000
H       -4.802035000      2.063822000     -3.170612000
H       -5.049673000      0.966034000     -4.521545000
C       -6.942399000      0.523429000     -2.513809000
H       -7.378506000      0.545560000     -3.507034000
H       -7.011818000      1.523022000     -2.094954000
H       -7.539276000     -0.142250000     -1.900041000
C       -3.803841000     -4.784044000     -1.868693000
H       -3.424728000     -4.352126000     -0.946346000
C       -4.757219000     -5.943769000     -1.484555000
H       -5.100819000     -6.473350000     -2.367081000
H       -5.625558000     -5.572195000     -0.951124000
H       -4.240672000     -6.653589000     -0.845128000
C       -2.588147000     -5.337182000     -2.652712000
H       -2.903897000     -5.824807000     -3.569260000
H       -2.055218000     -6.064674000     -2.047470000
H       -1.900689000     -4.538917000     -2.911948000
C       -3.645397000     -1.898406000      2.608314000
C       -4.547078000     -0.967712000      3.173859000
C       -4.760162000     -0.967768000      4.546660000
H       -5.445691000     -0.250747000      4.975838000
C       -4.111277000     -1.859846000      5.376789000
H       -4.291479000     -1.846097000      6.443533000
C       -3.224441000     -2.763726000      4.829285000
H       -2.711201000     -3.458398000      5.479137000
C       -2.975142000     -2.801621000      3.461677000
C       -5.283984000      0.097924000      2.338807000
H       -5.079266000     -0.081046000      1.288039000
C       -6.820030000      0.038982000      2.531930000
H       -7.197761000     -0.960017000      2.343047000
H       -7.305578000      0.724172000      1.843250000
H       -7.099561000      0.323421000      3.540760000
C       -4.761671000      1.515998000      2.678015000
H       -4.990751000      1.777665000      3.706124000
H       -5.224478000      2.252610000      2.027964000
H       -3.686217000      1.568350000      2.544198000
C       -1.942470000     -3.827357000      2.954924000
H       -1.868540000     -3.729847000      1.875880000
C       -0.545557000     -3.545565000      3.563686000
H       -0.548219000     -3.718561000      4.634845000
H       -0.248423000     -2.517901000      3.389799000
H        0.198416000     -4.200452000      3.120754000
C       -2.345752000     -5.291118000      3.268478000
H       -1.601597000     -5.970675000      2.863452000
H       -3.304825000     -5.545477000      2.831528000
H       -2.407199000     -5.459106000      4.338724000
N        0.360144000      0.123079000     -1.541482000
H       -0.501992000     -0.479710000     -2.232736000
H       -2.562431000     -1.035021000     -3.245474000
H        0.891241000      0.454564000     -2.359506000
237
2a'N
Y        1.720034000     -0.822424000      0.363416000
N        3.713676000     -2.039016000      1.161620000
N        3.608628000     -1.405690000     -1.011987000
N       -0.014533000     -0.000896000     -0.884840000
C        0.028408000      0.000912000      2.279287000
H        0.912877000     -0.475541000      2.756586000
C        2.299894000      1.612140000      0.895116000
H        2.485839000      2.413772000      0.154026000
C        0.250398000     -2.792825000      0.923717000
H        0.838013000     -3.362842000      0.177875000
H        0.798585000     -2.887031000      1.881860000
C        4.333268000     -2.032101000     -0.044852000
C        4.175380000     -2.755418000      2.333254000
C        4.082803000     -1.144673000     -2.355804000
Y       -0.150136000      1.901897000      0.377363000
Y       -1.575551000     -1.082245000      0.390426000
H       -0.817386000     -0.522742000      2.776355000
H        0.007121000      0.999621000      2.768429000
H        2.131425000      2.122827000      1.863561000
H        3.296489000      1.144091000      1.014511000
H       -0.647287000     -3.424198000      1.072589000
C        5.701847000     -2.648486000     -0.291421000
C        4.639656000     -2.025973000      3.449369000
C        4.079550000     -4.160221000      2.419912000
C        3.495646000     -1.825468000     -3.442930000
C        5.065591000     -0.163279000     -2.603141000
N       -0.593782000      3.822121000     -1.006470000
N       -0.085819000      4.239844000      1.162258000
C       -2.535542000      1.175438000      0.950306000
H       -2.628949000      2.268771000      1.099121000
C       -0.410503000      4.767205000     -0.044429000
N       -3.632506000     -2.192052000      1.173593000
N       -3.019509000     -2.422180000     -0.995661000
H       -2.884080000      0.750408000      1.912487000
H       -3.330061000      0.952824000      0.211626000
C       -3.928885000     -2.736198000     -0.032921000
C        6.757685000     -2.385578000      0.577879000
C        5.922422000     -3.479984000     -1.386671000
C        4.978022000     -2.702038000      4.614265000
C        4.771957000     -0.491430000      3.425261000
C        4.441924000     -4.793346000      3.603896000
C        3.566538000     -5.036233000      1.260477000
C        3.902070000     -1.518866000     -4.736192000
C        2.393200000     -2.885747000     -3.256139000
C        5.441174000      0.106304000     -3.913756000
C        5.714217000      0.661362000     -1.474784000
C       -1.064014000      4.096525000     -2.349079000
C        0.314088000      5.003024000      2.327041000
C       -0.569480000      6.259171000     -0.294254000
C       -4.489662000     -2.229835000      2.340848000
C       -3.025361000     -2.964681000     -2.339083000
C       -5.142955000     -3.618395000     -0.281065000
H        6.604004000     -1.732449000      1.424315000
C        8.007562000     -2.940849000      0.356119000
C        7.170940000     -4.039387000     -1.605651000
H        5.110598000     -3.700638000     -2.063995000
H        5.324362000     -2.142272000      5.471778000
C        4.884233000     -4.077854000      4.698195000
H        4.596070000     -0.156762000      2.406803000
C        6.187910000     -0.009549000      3.831046000
C        3.711589000      0.174635000      4.336104000
H        4.368862000     -5.869805000      3.671681000
H        3.318538000     -4.389297000      0.422795000
C        4.646325000     -6.038901000      0.780697000
C        2.278104000     -5.800729000      1.654707000
H        3.451185000     -2.037220000     -5.570900000
C        4.870386000     -0.564233000     -4.977671000
H        2.243067000     -3.036694000     -2.189138000
C        2.778087000     -4.256943000     -3.866838000
C        1.052710000     -2.399477000     -3.859781000
H        6.190746000      0.861241000     -4.105898000
H        5.357195000      0.282224000     -0.521446000
C        7.258725000      0.542946000     -1.478237000
C        5.292138000      2.148540000     -1.565469000
C       -0.184589000      3.930554000     -3.439588000
C       -2.408085000      4.449535000     -2.591140000
C       -0.540416000      5.046206000      3.449997000
C        1.580015000      5.621119000      2.400482000
C        0.032143000      6.866913000     -1.393411000
C       -1.325982000      7.039604000      0.576582000
C       -4.095667000     -2.992623000      3.461598000
C       -5.658590000     -1.444113000      2.418629000
C       -3.320221000     -2.117778000     -3.428095000
C       -2.664643000     -4.306422000     -2.583619000
C       -5.442100000     -4.661912000      0.591535000
C       -5.970444000     -3.401453000     -1.379990000
H        8.820142000     -2.723473000      1.037335000
C        8.216364000     -3.770111000     -0.735366000
H        7.326331000     -4.688126000     -2.458049000
H        5.154916000     -4.589302000      5.612465000
H        6.954301000     -0.478384000      3.222626000
H        6.397809000     -0.234532000      4.871404000
H        6.261187000      1.065958000      3.698771000
H        2.711256000     -0.145588000      4.062973000
H        3.761937000      1.255617000      4.244850000
H        3.876539000     -0.087631000      5.376521000
H        5.565846000     -5.526128000      0.520499000
H        4.293427000     -6.574919000     -0.095451000
H        4.870040000     -6.766763000      1.553768000
H        1.507062000     -5.113614000      1.986517000
H        2.473594000     -6.507489000      2.454491000
H        1.898985000     -6.353334000      0.800352000
H        5.174784000     -0.339348000     -5.991371000
H        3.704864000     -4.631386000     -3.445056000
H        2.899350000     -4.187075000     -4.942854000
H        1.996532000     -4.982583000     -3.662317000
H        0.779993000     -1.431454000     -3.453874000
H        0.257852000     -3.103183000     -3.631879000
H        1.124640000     -2.305299000     -4.938695000
H        7.568510000     -0.496169000     -1.445487000
H        7.671157000      1.050287000     -0.611061000
H        7.683851000      0.997201000     -2.367076000
H        4.210991000      2.240306000     -1.542240000
H        5.654118000      2.600494000     -2.483474000
H        5.701135000      2.705292000     -0.727701000
C       -0.660012000      4.124151000     -4.731144000
C        1.287801000      3.513796000     -3.257943000
C       -2.836168000      4.635023000     -3.900316000
C       -3.441903000      4.595890000     -1.458160000
C       -0.113113000      5.679805000      4.609453000
C       -1.936935000      4.396501000      3.437738000
C        1.958155000      6.254907000      3.579200000
C        2.584690000      5.610041000      1.232041000
H        0.629429000      6.276053000     -2.072110000
C       -0.116246000      8.226618000     -1.614640000
C       -1.478670000      8.398327000      0.352517000
H       -1.808901000      6.578918000      1.425886000
C       -4.855739000     -2.943062000      4.622729000
C       -2.832313000     -3.873674000      3.445556000
C       -6.394044000     -1.437068000      3.598921000
C       -6.153689000     -0.565532000      1.253477000
C       -3.256540000     -2.625655000     -4.720318000
C       -3.687419000     -0.632355000     -3.245346000
C       -2.616967000     -4.768851000     -3.893326000
C       -2.274240000     -5.277838000     -1.453189000
H       -4.801508000     -4.849851000      1.440672000
C       -6.544214000     -5.471642000      0.369536000
C       -7.075571000     -4.207943000     -1.599192000
H       -5.756151000     -2.590526000     -2.060335000
H        9.192725000     -4.205791000     -0.907797000
H        0.011292000      3.994556000     -5.568573000
C       -1.973860000      4.478198000     -4.967598000
H        1.498079000      3.462786000     -2.191722000
C        2.275229000      4.536088000     -3.875376000
C        1.541694000      2.109621000     -3.859306000
H       -3.866960000      4.901023000     -4.088510000
H       -2.929638000      4.482059000     -0.506959000
C       -4.120094000      5.988560000     -1.462174000
C       -4.512226000      3.479834000     -1.540304000
H       -0.763562000      5.703674000      5.472544000
C        1.127053000      6.284562000      4.680764000
H       -2.152523000      4.088003000      2.418641000
C       -3.055177000      5.379385000      3.868002000
C       -1.973176000      3.135575000      4.335618000
H        2.928055000      6.728889000      3.637024000
H        2.140668000      5.068895000      0.400359000
C        2.909054000      7.044642000      0.744017000
C        3.894182000      4.877375000      1.617090000
H        0.361621000      8.686443000     -2.470092000
C       -0.872786000      8.994908000     -0.742782000
H       -2.073795000      8.991465000      1.034871000
H       -4.548283000     -3.519341000      5.484102000
C       -6.000829000     -2.173656000      4.697957000
H       -2.457069000     -3.900807000      2.426360000
C       -3.120038000     -5.336180000      3.869668000
C       -1.724030000     -3.274956000      4.345950000
H       -7.290076000     -0.835315000      3.660055000
H       -5.465232000     -0.678200000      0.419761000
C       -7.559905000     -0.999220000      0.767850000
C       -6.170920000      0.933835000      1.642602000
H       -3.479939000     -1.977811000     -5.556455000
C       -2.912632000     -3.941693000     -4.959030000
H       -3.733734000     -0.421479000     -2.178963000
C       -5.072939000     -0.284808000     -3.846081000
C       -2.602940000      0.283966000     -3.863554000
H       -2.336419000     -5.795449000     -4.083290000
H       -2.425329000     -4.777501000     -0.500826000
C       -3.146970000     -6.557628000     -1.454867000
C       -0.774676000     -5.653874000     -1.542418000
H       -6.761416000     -6.282120000      1.053304000
C       -7.364183000     -5.245283000     -0.725504000
H       -7.712883000     -4.024091000     -2.454543000
H       -2.325960000      4.625446000     -5.980106000
H        3.296800000      4.227688000     -3.674099000
H        2.132960000      5.526384000     -3.455762000
H        2.149479000      4.602645000     -4.951086000
H        0.846460000      1.386381000     -3.447397000
H        2.551826000      1.779708000     -3.636227000
H        1.418049000      2.121214000     -4.937585000
H       -3.379680000      6.780944000     -1.435075000
H       -4.762170000      6.090524000     -0.592213000
H       -4.731093000      6.123532000     -2.348504000
H       -4.044757000      2.500641000     -1.516285000
H       -5.089476000      3.560872000     -2.455859000
H       -5.195369000      3.553958000     -0.699535000
H        1.443393000      6.776898000      5.590860000
H       -3.034248000      6.286297000      3.272585000
H       -2.955505000      5.658012000      4.911746000
H       -4.025958000      4.910280000      3.737204000
H       -1.203209000      2.429454000      4.041231000
H       -2.937812000      2.643160000      4.255769000
H       -1.809109000      3.397759000      5.376222000
H        2.002982000      7.583494000      0.489317000
H        3.542331000      7.003688000     -0.137331000
H        3.433938000      7.605333000      1.510569000
H        3.687173000      3.867446000      1.954637000
H        4.416088000      5.402797000      2.410142000
H        4.554409000      4.821724000      0.756844000
H       -0.990397000     10.057288000     -0.916991000
H       -6.583528000     -2.148817000      5.609324000
H       -3.912883000     -5.772182000      3.270725000
H       -3.413429000     -5.394079000      4.912526000
H       -2.225889000     -5.938603000      3.738660000
H       -1.503089000     -2.251993000      4.058018000
H       -0.812411000     -3.859023000      4.261113000
H       -2.031766000     -3.272194000      5.387002000
H       -7.575083000     -2.052592000      0.510168000
H       -7.842765000     -0.427564000     -0.111178000
H       -8.305853000     -0.826515000      1.536752000
H       -5.191104000      1.257399000      1.977448000
H       -6.883733000      1.121703000      2.438838000
H       -6.455386000      1.536085000      0.785068000
H       -2.869011000     -4.319659000     -5.971977000
H       -5.857303000     -0.894297000     -3.409941000
H       -5.083713000     -0.436492000     -4.920477000
H       -5.307270000      0.757317000     -3.650515000
H       -1.623554000      0.036831000     -3.468900000
H       -2.812212000      1.324600000     -3.635024000
H       -2.570143000      0.172897000     -4.942740000
H       -4.202196000     -6.308084000     -1.423423000
H       -2.913450000     -7.166464000     -0.586376000
H       -2.964436000     -7.154271000     -2.342457000
H       -0.156073000     -4.762399000     -1.522241000
H       -0.563358000     -6.196112000     -2.458577000
H       -0.496083000     -6.283186000     -0.702504000
H       -8.226819000     -5.876872000     -0.898104000
H       -0.024184000     -0.004687000     -1.909886000
14
PhPH2
C       -1.634009000     -1.205939000     -0.004023000
C       -0.232525000     -1.212608000      0.019747000
C        0.493570000     -0.005163000      0.011533000
C       -0.218143000      1.211384000      0.003724000
C       -1.618881000      1.218205000     -0.005642000
C       -2.330025000      0.009746000     -0.014649000
H       -2.179771000     -2.148915000     -0.003192000
H        0.302131000     -2.162263000      0.049436000
H        0.324285000      2.156592000      0.004200000
H       -2.154350000      2.167250000     -0.008490000
H       -3.419334000      0.016820000     -0.023420000
P        2.345673000     -0.102535000      0.053583000
H        2.584786000      1.246299000      0.437436000
H        2.597241000      0.168484000     -1.323864000
252
AP
Y        1.965085000     -0.252133000     -0.386853000
Y       -1.190676000     -1.449516000      0.166440000
Y       -0.748074000      1.744220000     -0.210620000
N        4.392362000     -0.475518000     -0.715158000
N        3.730133000     -0.296433000      1.459211000
N       -2.364752000     -3.427801000     -0.569256000
N       -2.695673000     -2.800520000      1.584339000
N       -2.032077000      3.532786000     -1.206971000
N       -1.366844000      3.854939000      0.949155000
C       -0.371087000     -0.096744000     -1.623547000
H       -0.579625000      0.683982000     -2.397765000
H       -0.400476000     -1.035646000     -2.220103000
C        0.309260000      0.122915000      1.680610000
H       -0.245634000     -0.605290000      2.311454000
H        1.344337000      0.030624000      2.060887000
H       -0.023390000      1.094489000      2.097511000
C       -2.693317000      0.450913000      0.804951000
H       -3.108859000      1.474132000      0.748568000
H       -3.451912000     -0.160779000      0.276497000
H       -2.765578000      0.175437000      1.872227000
C        1.722164000      2.279217000     -0.267943000
H        1.608270000      2.914645000     -1.169853000
H        1.428759000      2.909204000      0.593217000
H        2.817056000      2.186316000     -0.137576000
C        1.108775000     -2.584318000     -0.060601000
H        1.195500000     -2.950202000     -1.102522000
H        0.542872000     -3.376945000      0.466594000
H        2.120756000     -2.683889000      0.380078000
C        4.762506000     -0.394605000      0.589155000
C        6.226833000     -0.378154000      1.022583000
C        7.049763000     -1.483290000      0.833775000
H        6.647772000     -2.380306000      0.388483000
C        8.378171000     -1.447357000      1.227529000
H        9.005343000     -2.317078000      1.078994000
C        8.901358000     -0.303357000      1.809697000
H        9.939368000     -0.275262000      2.116511000
C        8.090333000      0.805688000      1.994277000
H        8.492677000      1.705333000      2.442149000
C        6.761659000      0.767495000      1.602660000
H        6.136830000      1.638384000      1.732467000
C        5.355446000     -0.518876000     -1.799683000
C        5.653411000     -1.748570000     -2.426138000
C        6.467114000     -1.760085000     -3.552095000
H        6.684147000     -2.698911000     -4.041764000
C        7.005909000     -0.594133000     -4.061170000
H        7.635026000     -0.622089000     -4.941070000
C        6.741764000      0.605154000     -3.430877000
H        7.171701000      1.515216000     -3.825313000
C        5.929178000      0.666206000     -2.304202000
C        5.094040000     -3.089965000     -1.911762000
H        4.655815000     -2.917339000     -0.931825000
C        3.976749000     -3.630703000     -2.835522000
H        3.158520000     -2.923515000     -2.899081000
H        3.589457000     -4.567903000     -2.447303000
H        4.354380000     -3.806696000     -3.838025000
C        6.195583000     -4.170576000     -1.756643000
H        5.797478000     -5.025648000     -1.218314000
H        7.052866000     -3.792221000     -1.210517000
H        6.541288000     -4.517864000     -2.724516000
C        5.676592000      2.043684000     -1.661283000
H        5.120494000      1.892446000     -0.740787000
C        7.000419000      2.760682000     -1.295076000
H        7.551356000      3.045776000     -2.185126000
H        7.634602000      2.119147000     -0.692628000
H        6.788122000      3.662333000     -0.728117000
C        4.820679000      2.952540000     -2.577057000
H        5.323816000      3.139719000     -3.520552000
H        4.639535000      3.907227000     -2.092317000
H        3.860839000      2.492956000     -2.787242000
C        3.927229000     -0.420891000      2.896875000
C        3.843775000      0.705340000      3.742203000
C        3.945337000      0.536725000      5.119547000
H        3.875746000      1.401737000      5.763738000
C        4.131154000     -0.708417000      5.682490000
H        4.205159000     -0.819219000      6.756232000
C        4.222199000     -1.812367000      4.857931000
H        4.366385000     -2.789021000      5.297788000
C        4.127936000     -1.694614000      3.477311000
C        3.622292000      2.136644000      3.216688000
H        3.639562000      2.106086000      2.130133000
C        2.244230000      2.683222000      3.664169000
H        1.447911000      2.015423000      3.361254000
H        2.063166000      3.658619000      3.224052000
H        2.205128000      2.788378000      4.743433000
C        4.728569000      3.115755000      3.690493000
H        4.643056000      3.310182000      4.754364000
H        4.630172000      4.063357000      3.169038000
H        5.721505000      2.723636000      3.502594000
C        4.219141000     -2.987288000      2.643106000
H        4.231568000     -2.717716000      1.591454000
C        5.514491000     -3.784222000      2.941657000
H        6.390625000     -3.150133000      2.862139000
H        5.617510000     -4.602290000      2.234718000
H        5.491606000     -4.206554000      3.940568000
C        2.984585000     -3.891113000      2.880263000
H        2.953963000     -4.238493000      3.907973000
H        3.023427000     -4.759369000      2.228984000
H        2.067480000     -3.349794000      2.674996000
C       -2.977722000     -3.707372000      0.615744000
C       -3.866499000     -4.925105000      0.833386000
C       -4.833303000     -5.286044000     -0.102418000
H       -4.970344000     -4.688439000     -0.991066000
C       -5.633370000     -6.398750000      0.102136000
H       -6.383225000     -6.662048000     -0.632638000
C       -5.475551000     -7.169655000      1.243528000
H       -6.099931000     -8.040074000      1.402576000
C       -4.514682000     -6.821314000      2.180516000
H       -4.382838000     -7.419547000      3.072846000
C       -3.717742000     -5.706541000      1.977403000
H       -2.967189000     -5.446969000      2.709085000
C       -2.439639000     -4.250440000     -1.757668000
C       -3.152101000     -3.773311000     -2.880567000
C       -3.183261000     -4.537499000     -4.040738000
H       -3.733619000     -4.176355000     -4.898311000
C       -2.528588000     -5.751157000     -4.121286000
H       -2.567034000     -6.333512000     -5.032386000
C       -1.822342000     -6.212519000     -3.028469000
H       -1.304073000     -7.158875000     -3.095709000
C       -1.763007000     -5.486349000     -1.844548000
C       -3.900736000     -2.425337000     -2.878362000
H       -3.761587000     -1.958947000     -1.905615000
C       -5.425718000     -2.600325000     -3.092208000
H       -5.637252000     -3.054070000     -4.055210000
H       -5.914790000     -1.631297000     -3.060166000
H       -5.863581000     -3.223175000     -2.319477000
C       -3.328470000     -1.462577000     -3.947775000
H       -3.502032000     -1.843950000     -4.949024000
H       -2.260791000     -1.328645000     -3.813180000
H       -3.805732000     -0.490870000     -3.867670000
C       -0.932641000     -6.064186000     -0.681852000
H       -1.012894000     -5.389510000      0.166389000
C       -1.453091000     -7.453032000     -0.233291000
H       -2.510548000     -7.415533000      0.003641000
H       -0.915665000     -7.782717000      0.650967000
H       -1.305261000     -8.193575000     -1.012438000
C        0.566904000     -6.162744000     -1.057917000
H        0.719551000     -6.869664000     -1.867057000
H        1.144494000     -6.497961000     -0.201585000
H        0.950163000     -5.197567000     -1.370758000
C       -3.329010000     -2.767875000      2.885895000
C       -4.697246000     -2.445493000      3.031252000
C       -5.252414000     -2.390629000      4.304086000
H       -6.299302000     -2.145047000      4.413909000
C       -4.496948000     -2.637453000      5.432728000
H       -4.949274000     -2.594107000      6.414600000
C       -3.154508000     -2.926174000      5.294030000
H       -2.559395000     -3.106683000      6.178098000
C       -2.551570000     -2.989583000      4.043209000
C       -5.612217000     -2.102267000      1.839220000
H       -5.044765000     -2.217945000      0.919526000
C       -6.843002000     -3.040665000      1.760533000
H       -6.542017000     -4.082273000      1.762831000
H       -7.399262000     -2.847033000      0.848123000
H       -7.509721000     -2.878108000      2.600873000
C       -6.083578000     -0.628126000      1.911614000
H       -6.679496000     -0.454372000      2.801676000
H       -6.693274000     -0.390602000      1.045263000
H       -5.234775000      0.047373000      1.930180000
C       -1.039512000     -3.282031000      3.991842000
H       -0.714954000     -3.233261000      2.954266000
C       -0.243315000     -2.219174000      4.791179000
H       -0.523015000     -1.216255000      4.486448000
H        0.822040000     -2.342515000      4.624724000
H       -0.430956000     -2.313096000      5.855678000
C       -0.697943000     -4.699718000      4.516146000
H       -1.016010000     -4.821173000      5.546734000
H        0.374375000     -4.862943000      4.471301000
H       -1.179560000     -5.466562000      3.918890000
C       -2.066000000      4.337516000     -0.109266000
C       -2.869123000      5.630684000     -0.057517000
C       -2.737060000      6.611173000     -1.036882000
H       -2.033251000      6.472501000     -1.843600000
C       -3.490547000      7.772543000     -0.976114000
H       -3.372800000      8.528847000     -1.741446000
C       -4.390790000      7.965221000      0.060607000
H       -4.980850000      8.872112000      0.106343000
C       -4.534304000      6.991438000      1.037081000
H       -5.239331000      7.131976000      1.846302000
C       -3.777070000      5.832692000      0.978184000
H       -3.901251000      5.069649000      1.732074000
C       -2.761335000      3.811447000     -2.431092000
C       -2.058091000      4.262615000     -3.568348000
C       -2.740938000      4.451843000     -4.762990000
H       -2.200961000      4.789343000     -5.636479000
C       -4.098946000      4.216870000     -4.857367000
H       -4.615722000      4.369554000     -5.795717000
C       -4.789514000      3.782654000     -3.743840000
H       -5.851078000      3.593707000     -3.820982000
C       -4.147142000      3.575478000     -2.528031000
C       -0.540400000      4.522300000     -3.541991000
H       -0.201238000      4.442510000     -2.511885000
C        0.204060000      3.448997000     -4.370979000
H       -0.064608000      2.454153000     -4.030949000
H        1.278385000      3.573544000     -4.272314000
H       -0.052662000      3.526356000     -5.422900000
C       -0.156676000      5.934638000     -4.050638000
H       -0.397808000      6.053616000     -5.101711000
H        0.911795000      6.088954000     -3.931616000
H       -0.673286000      6.710249000     -3.495572000
C       -4.979138000      3.051209000     -1.343696000
H       -4.346945000      3.035791000     -0.461174000
C       -6.192670000      3.961354000     -1.030856000
H       -6.915654000      3.945519000     -1.839601000
H       -5.877014000      4.987806000     -0.875518000
H       -6.689696000      3.616598000     -0.128876000
C       -5.445308000      1.598999000     -1.607459000
H       -6.098992000      1.552263000     -2.472762000
H       -5.988259000      1.217804000     -0.748603000
H       -4.591156000      0.953630000     -1.787208000
C       -1.042899000      4.642829000      2.124777000
C       -0.098599000      5.692382000      2.051210000
C        0.262776000      6.365680000      3.212212000
H        0.985502000      7.167463000      3.155144000
C       -0.274026000      6.029188000      4.438656000
H        0.024620000      6.562443000      5.331449000
C       -1.195829000      5.004483000      4.512251000
H       -1.616468000      4.740592000      5.472364000
C       -1.596851000      4.306639000      3.379008000
C        0.576297000      6.130341000      0.735173000
H        0.183216000      5.523590000     -0.076040000
C        0.274393000      7.614764000      0.406231000
H       -0.792585000      7.807501000      0.414720000
H        0.660053000      7.863800000     -0.578010000
H        0.744134000      8.274581000      1.128142000
C        2.109775000      5.911676000      0.774526000
H        2.571444000      6.526299000      1.540378000
H        2.546289000      6.180239000     -0.182959000
H        2.350525000      4.874323000      0.978518000
C       -2.632445000      3.179097000      3.555201000
H       -2.906439000      2.815210000      2.569452000
C       -2.041025000      1.992820000      4.356190000
H       -1.794653000      2.296141000      5.368873000
H       -1.138768000      1.618294000      3.886627000
H       -2.760995000      1.181542000      4.410275000
C       -3.927820000      3.670351000      4.252066000
H       -4.672547000      2.879929000      4.240302000
H       -4.346132000      4.538075000      3.753568000
H       -3.738769000      3.936647000      5.286661000
C       -0.007746000     -2.947242000     -5.559442000
C        0.696481000     -2.292125000     -4.539178000
C        1.199477000     -0.993271000     -4.736951000
C        0.969643000     -0.355344000     -5.972729000
C        0.256194000     -1.005575000     -6.986764000
C       -0.230527000     -2.304686000     -6.783763000
H       -0.388848000     -3.953338000     -5.389449000
H        0.849687000     -2.797123000     -3.587001000
H        1.350902000      0.650830000     -6.143964000
H        0.082743000     -0.497961000     -7.934949000
H       -0.782605000     -2.810877000     -7.574453000
P        2.211230000     -0.175347000     -3.422031000
H        1.916214000      1.168934000     -3.728294000
H        3.458196000     -0.177143000     -4.113922000
252
TS1P, Imaginary frequency = i872.38 cm-1
Y        1.666783000     -0.992466000      0.207430000
Y       -0.277591000      1.867694000     -0.089284000
Y       -1.739152000     -1.060980000      0.181992000
N        3.965318000     -1.758828000      0.404849000
N        3.202351000     -1.448512000     -1.708337000
N        0.044940000      4.046180000      0.883768000
N       -0.834608000      3.991011000     -1.200888000
N       -3.843018000     -1.797076000      1.140799000
N       -3.336236000     -2.504047000     -0.961870000
C       -0.243786000      0.129701000      1.682279000
H       -1.040275000     -0.192385000      2.397501000
H        0.326805000      0.871391000      2.279129000
C       -0.060458000     -0.206255000     -1.725358000
H       -0.109689000      0.739322000     -2.310205000
H        0.831151000     -0.698345000     -2.160273000
H       -0.897753000     -0.791159000     -2.160985000
C       -2.651465000      1.193787000     -0.530717000
H       -3.566509000      0.572205000     -0.555255000
H       -2.918021000      2.015357000      0.164411000
H       -2.600601000      1.648759000     -1.538875000
C       -0.020577000     -2.880637000     -0.020387000
H       -0.579043000     -3.430843000      0.763801000
H       -0.552040000     -3.081764000     -0.970573000
H        0.913740000     -3.467432000     -0.112911000
C        2.193412000      1.495464000      0.048505000
H        2.340921000      1.915632000      1.059641000
H        2.154466000      2.374687000     -0.626391000
H        3.157343000      1.034179000     -0.233187000
C        4.253869000     -1.797386000     -0.921120000
C        5.633048000     -2.166768000     -1.454363000
C        6.775557000     -1.611717000     -0.881268000
H        6.679100000     -0.907114000     -0.068834000
C        8.035047000     -1.939463000     -1.355869000
H        8.911630000     -1.496286000     -0.901259000
C        8.171419000     -2.828445000     -2.411171000
H        9.155883000     -3.086245000     -2.781485000
C        7.041648000     -3.383565000     -2.991734000
H        7.138952000     -4.078650000     -3.815676000
C        5.781988000     -3.053172000     -2.518039000
H        4.909403000     -3.496712000     -2.972639000
C        4.843148000     -2.267009000      1.440259000
C        5.441972000     -1.363727000      2.342824000
C        6.199774000     -1.855371000      3.398270000
H        6.650253000     -1.165405000      4.097527000
C        6.394721000     -3.212104000      3.567634000
H        6.990679000     -3.578904000      4.392892000
C        5.827479000     -4.096171000      2.671187000
H        5.987071000     -5.157085000      2.803946000
C        5.050079000     -3.653756000      1.606686000
C        5.288179000      0.161605000      2.187446000
H        4.891105000      0.357880000      1.195323000
C        4.286857000      0.734967000      3.218348000
H        3.307925000      0.279376000      3.098082000
H        4.183349000      1.808374000      3.091599000
H        4.621819000      0.541136000      4.232468000
C        6.640114000      0.912077000      2.294738000
H        6.502095000      1.955424000      2.026644000
H        7.381645000      0.485345000      1.626979000
H        7.034000000      0.876408000      3.304797000
C        4.452637000     -4.713113000      0.658462000
H        3.887214000     -4.201933000     -0.116512000
C        5.564812000     -5.543813000     -0.032516000
H        6.090341000     -6.161000000      0.688793000
H        6.289639000     -4.902184000     -0.520954000
H        5.128753000     -6.199150000     -0.780726000
C        3.473829000     -5.661450000      1.392813000
H        3.989057000     -6.238593000      2.153606000
H        3.032771000     -6.355449000      0.683321000
H        2.679944000     -5.095561000      1.866432000
C        3.303437000     -1.310357000     -3.149862000
C        2.623461000     -2.222594000     -3.985953000
C        2.675023000     -2.054039000     -5.364904000
H        2.158271000     -2.756581000     -6.003503000
C        3.373858000     -1.010778000     -5.937797000
H        3.400595000     -0.894731000     -7.013191000
C        4.039949000     -0.117916000     -5.122339000
H        4.586229000      0.699875000     -5.570862000
C        4.024374000     -0.247850000     -3.738802000
C        1.812140000     -3.413284000     -3.437958000
H        1.823956000     -3.362367000     -2.352844000
C        0.336777000     -3.348900000     -3.904302000
H       -0.101974000     -2.386870000     -3.666117000
H       -0.244898000     -4.122660000     -3.413830000
H        0.258959000     -3.500030000     -4.975759000
C        2.420857000     -4.779589000     -3.844446000
H        2.458778000     -4.885009000     -4.924047000
H        1.811425000     -5.585829000     -3.446866000
H        3.426098000     -4.897682000     -3.455268000
C        4.788046000      0.805358000     -2.912670000
H        4.738399000      0.526141000     -1.864906000
C        6.283599000      0.885843000     -3.310258000
H        6.750227000     -0.092227000     -3.276992000
H        6.813735000      1.541635000     -2.625890000
H        6.399134000      1.283440000     -4.312993000
C        4.134787000      2.201196000     -3.053361000
H        4.222472000      2.566983000     -4.071088000
H        4.621789000      2.912810000     -2.393355000
H        3.082463000      2.157704000     -2.795404000
C       -0.400650000      4.772222000     -0.175896000
C       -0.389505000      6.292402000     -0.222071000
C       -0.798748000      7.048300000      0.874234000
H       -1.142966000      6.553647000      1.770087000
C       -0.781144000      8.432896000      0.822320000
H       -1.107744000      9.005679000      1.680685000
C       -0.348460000      9.081230000     -0.324345000
H       -0.333298000     10.163420000     -0.364070000
C        0.066460000      8.338522000     -1.419511000
H        0.410380000      8.837335000     -2.316420000
C        0.044397000      6.954485000     -1.368869000
H        0.377418000      6.383312000     -2.222715000
C        0.631139000      4.580921000      2.094777000
C       -0.081511000      4.453663000      3.307950000
C        0.503368000      4.894446000      4.488735000
H       -0.041992000      4.802190000      5.417601000
C        1.766853000      5.452458000      4.500287000
H        2.206619000      5.789551000      5.429695000
C        2.462412000      5.578400000      3.314400000
H        3.450464000      6.016913000      3.326496000
C        1.921042000      5.154407000      2.105920000
C       -1.498204000      3.848270000      3.381375000
H       -1.775823000      3.503586000      2.387221000
C       -2.557255000      4.892615000      3.817446000
H       -2.332785000      5.287111000      4.803440000
H       -3.538768000      4.429073000      3.853116000
H       -2.602967000      5.722751000      3.120841000
C       -1.549418000      2.627837000      4.333067000
H       -1.397901000      2.929181000      5.364468000
H       -0.783971000      1.905061000      4.074246000
H       -2.518061000      2.141950000      4.261444000
C        2.769527000      5.338172000      0.831388000
H        2.204158000      4.962095000     -0.017554000
C        3.082787000      6.833513000      0.568867000
H        2.176038000      7.427609000      0.557146000
H        3.578959000      6.946296000     -0.390522000
H        3.739089000      7.230971000      1.336138000
C        4.093666000      4.537236000      0.899434000
H        4.720332000      4.888334000      1.712634000
H        4.645512000      4.656910000     -0.028079000
H        3.901253000      3.480587000      1.046879000
C       -1.534694000      4.485875000     -2.369072000
C       -2.828746000      5.044153000     -2.267911000
C       -3.486188000      5.453297000     -3.421761000
H       -4.476487000      5.879297000     -3.342875000
C       -2.907352000      5.320942000     -4.668102000
H       -3.436022000      5.645669000     -5.554501000
C       -1.649724000      4.761903000     -4.770114000
H       -1.198302000      4.651733000     -5.746071000
C       -0.950315000      4.340299000     -3.645235000
C       -3.581555000      5.184596000     -0.930780000
H       -2.932080000      4.847642000     -0.127257000
C       -3.979784000      6.652786000     -0.636437000
H       -3.119094000      7.310063000     -0.689547000
H       -4.407760000      6.728422000      0.358815000
H       -4.719830000      7.004150000     -1.347733000
C       -4.842041000      4.285534000     -0.913768000
H       -5.561536000      4.610617000     -1.658133000
H       -5.318569000      4.330278000      0.060697000
H       -4.579033000      3.253771000     -1.120897000
C        0.442413000      3.718336000     -3.859521000
H        0.843950000      3.434608000     -2.888659000
C        0.353531000      2.441410000     -4.732797000
H       -0.386056000      1.753041000     -4.337431000
H        1.313534000      1.935096000     -4.759728000
H        0.072751000      2.687822000     -5.751541000
C        1.435857000      4.723545000     -4.495405000
H        1.088612000      5.050838000     -5.470006000
H        2.406817000      4.255742000     -4.622562000
H        1.563648000      5.599740000     -3.868714000
C       -4.209064000     -2.569909000      0.075922000
C       -5.463033000     -3.432983000      0.064327000
C       -5.790022000     -4.221271000      1.165997000
H       -5.145793000     -4.225601000      2.032292000
C       -6.926717000     -5.012664000      1.155638000
H       -7.163571000     -5.622089000      2.018201000
C       -7.755242000     -5.026200000      0.043591000
H       -8.644845000     -5.643860000      0.035791000
C       -7.438965000     -4.247073000     -1.058520000
H       -8.080907000     -4.250621000     -1.929958000
C       -6.299820000     -3.458073000     -1.048672000
H       -6.066435000     -2.849054000     -1.908709000
C       -4.716093000     -1.570233000      2.279760000
C       -4.349889000     -2.044627000      3.556432000
C       -5.199329000     -1.823750000      4.635722000
H       -4.924799000     -2.201398000      5.610403000
C       -6.384454000     -1.133166000      4.491758000
H       -7.031649000     -0.971965000      5.343726000
C       -6.726584000     -0.635811000      3.249924000
H       -7.642987000     -0.073280000      3.141291000
C       -5.917992000     -0.839620000      2.139191000
C       -3.024959000     -2.779167000      3.837188000
H       -2.447554000     -2.820695000      2.914913000
C       -2.192125000     -2.002579000      4.887353000
H       -2.022866000     -0.980770000      4.562890000
H       -1.230564000     -2.481389000      5.037282000
H       -2.703578000     -1.972773000      5.843312000
C       -3.238189000     -4.239279000      4.309397000
H       -3.817184000     -4.272614000      5.226782000
H       -2.277050000     -4.708742000      4.497253000
H       -3.756353000     -4.824549000      3.557374000
C       -6.356398000     -0.193363000      0.810972000
H       -5.682217000     -0.517336000      0.023789000
C       -7.792697000     -0.600407000      0.397054000
H       -8.528652000     -0.185782000      1.077547000
H       -7.906427000     -1.678786000      0.388819000
H       -8.009088000     -0.225751000     -0.599025000
C       -6.251413000      1.348450000      0.905816000
H       -6.928709000      1.736666000      1.659758000
H       -6.508324000      1.799880000     -0.047215000
H       -5.241631000      1.648107000      1.167799000
C       -3.419781000     -3.305804000     -2.168909000
C       -3.144152000     -4.690509000     -2.156772000
C       -3.167392000     -5.395007000     -3.355788000
H       -2.957176000     -6.455318000     -3.349354000
C       -3.450159000     -4.772039000     -4.554557000
H       -3.462074000     -5.339573000     -5.475761000
C       -3.717613000     -3.417150000     -4.566114000
H       -3.940906000     -2.930282000     -5.505144000
C       -3.709264000     -2.668328000     -3.395862000
C       -2.810390000     -5.476547000     -0.872062000
H       -2.835867000     -4.791101000     -0.028453000
C       -3.848888000     -6.596421000     -0.606103000
H       -4.859430000     -6.204176000     -0.610616000
H       -3.662391000     -7.053165000      0.361319000
H       -3.782461000     -7.371554000     -1.362436000
C       -1.390600000     -6.094806000     -0.926571000
H       -1.316740000     -6.829457000     -1.721626000
H       -1.168186000     -6.590503000      0.013625000
H       -0.638752000     -5.332036000     -1.093908000
C       -4.023781000     -1.162017000     -3.498337000
H       -3.963719000     -0.733545000     -2.502005000
C       -2.997716000     -0.425053000     -4.394797000
H       -3.083903000     -0.743809000     -5.428504000
H       -1.982719000     -0.617661000     -4.065951000
H       -3.173046000      0.646059000     -4.355781000
C       -5.455050000     -0.895336000     -4.030821000
H       -5.640244000      0.174248000     -4.065636000
H       -6.206970000     -1.345349000     -3.391797000
H       -5.579761000     -1.292341000     -5.033108000
C        1.729761000     -0.281985000      6.379133000
C        1.308590000     -0.735133000      5.122361000
C        1.941806000     -1.830857000      4.496944000
C        3.017174000     -2.449660000      5.168355000
C        3.442236000     -1.995017000      6.424886000
C        2.798127000     -0.911060000      7.035054000
H        1.224884000      0.564429000      6.844988000
H        0.486791000     -0.231675000      4.617398000
H        3.518260000     -3.296846000      4.700833000
H        4.273092000     -2.491011000      6.926376000
H        3.124946000     -0.557565000      8.012601000
P        1.450487000     -2.505245000      2.841633000
H        0.662716000     -1.103762000      2.275233000
H        0.121304000     -2.895609000      3.140890000
252
BP
Y        1.830086000     -1.043445000     -0.571570000
Y       -1.699873000     -1.043648000      0.013769000
Y       -0.165384000      1.882953000     -0.122301000
N        4.289450000     -1.471799000     -0.772189000
N        3.248907000     -1.928719000      1.196978000
N       -3.552510000     -2.317389000     -0.805251000
N       -3.531903000     -1.830732000      1.406812000
N       -0.668819000      4.054978000     -0.972701000
N        0.037131000      3.904595000      1.182750000
C       -0.738001000      0.238513000     -1.963287000
H       -1.171432000      1.192948000     -2.348622000
H       -1.370430000     -0.520504000     -2.468917000
C        0.257113000     -0.150391000      1.525923000
H       -0.496416000     -0.681912000      2.150342000
H        1.198235000     -0.651159000      1.825829000
H        0.334011000      0.821839000      2.059790000
C       -2.485562000      1.236034000      0.659511000
H       -2.543282000      2.340931000      0.654224000
H       -3.389801000      0.937761000      0.092364000
H       -2.677239000      0.945631000      1.707022000
C        2.243250000      1.415622000     -0.629344000
H        2.266728000      2.522178000     -0.629622000
H        3.050160000      1.150873000      0.081606000
H        2.623468000      1.153934000     -1.635738000
C       -0.066460000     -2.782223000     -0.592162000
H       -0.625998000     -2.889661000     -1.542528000
H       -0.660813000     -3.330476000      0.170370000
H        0.806313000     -3.443577000     -0.737289000
C        4.432142000     -1.842053000      0.523138000
C        5.795611000     -2.046850000      1.174006000
C        6.090064000     -3.146329000      1.975827000
H        5.343518000     -3.906042000      2.145276000
C        7.342862000     -3.283361000      2.552955000
H        7.556604000     -4.148233000      3.167626000
C        8.316887000     -2.319710000      2.344058000
H        9.294895000     -2.427576000      2.796444000
C        8.031060000     -1.214461000      1.557068000
H        8.782010000     -0.451902000      1.395625000
C        6.780280000     -1.081308000      0.977658000
H        6.555079000     -0.211248000      0.380619000
C        5.345206000     -1.642243000     -1.761138000
C        5.730556000     -2.940917000     -2.172702000
C        6.671512000     -3.081663000     -3.185813000
H        6.960059000     -4.073814000     -3.502340000
C        7.240487000     -1.986871000     -3.804529000
H        7.966179000     -2.120176000     -4.595909000
C        6.874315000     -0.721486000     -3.397562000
H        7.322280000      0.137459000     -3.876313000
C        5.943004000     -0.525979000     -2.383728000
C        5.162742000     -4.238145000     -1.560345000
H        4.452766000     -3.974712000     -0.781702000
C        4.402411000     -5.086775000     -2.608689000
H        3.605849000     -4.506594000     -3.060652000
H        3.969398000     -5.959170000     -2.128127000
H        5.072134000     -5.429805000     -3.390304000
C        6.287175000     -5.090629000     -0.916264000
H        5.858711000     -5.946812000     -0.404307000
H        6.859224000     -4.513279000     -0.198484000
H        6.970750000     -5.462248000     -1.672254000
C        5.610242000      0.929212000     -2.004083000
H        4.956917000      0.914359000     -1.137441000
C        6.871464000      1.749301000     -1.624905000
H        7.509853000      1.905806000     -2.487802000
H        7.458625000      1.252543000     -0.860427000
H        6.576533000      2.723652000     -1.246276000
C        4.867922000      1.648052000     -3.157756000
H        5.518548000      1.763829000     -4.018632000
H        4.546452000      2.635885000     -2.840668000
H        3.996493000      1.082822000     -3.469154000
C        3.167878000     -2.339374000      2.590403000
C        3.449266000     -1.443171000      3.641728000
C        3.336458000     -1.878736000      4.958454000
H        3.555756000     -1.191950000      5.763811000
C        2.951031000     -3.168716000      5.258602000
H        2.870967000     -3.489972000      6.288837000
C        2.664134000     -4.045724000      4.229895000
H        2.359338000     -5.055461000      4.466706000
C        2.764469000     -3.658844000      2.899454000
C        3.867403000      0.020762000      3.403682000
H        3.879801000      0.203445000      2.331517000
C        2.854158000      1.004308000      4.041566000
H        1.844424000      0.789415000      3.711126000
H        3.096865000      2.025520000      3.764257000
H        2.876160000      0.936206000      5.124077000
C        5.287148000      0.312394000      3.951204000
H        5.310985000      0.217763000      5.031913000
H        5.582959000      1.325289000      3.694367000
H        6.015607000     -0.372911000      3.533513000
C        2.411532000     -4.698633000      1.816622000
H        2.539905000     -4.233254000      0.843152000
C        3.325955000     -5.948811000      1.862304000
H        4.366751000     -5.687723000      1.710414000
H        3.036493000     -6.640649000      1.076902000
H        3.239118000     -6.462825000      2.814156000
C        0.934766000     -5.146641000      1.941887000
H        0.785885000     -5.744216000      2.835380000
H        0.651711000     -5.746443000      1.082310000
H        0.275224000     -4.288223000      1.994444000
C       -4.174708000     -2.475343000      0.391861000
C       -5.421788000     -3.320859000      0.593619000
C       -6.484959000     -3.275383000     -0.305902000
H       -6.441813000     -2.615241000     -1.158971000
C       -7.608075000     -4.062820000     -0.109970000
H       -8.427635000     -4.011656000     -0.815117000
C       -7.681926000     -4.911593000      0.983978000
H       -8.559218000     -5.528511000      1.135133000
C       -6.627288000     -4.968854000      1.882566000
H       -6.674787000     -5.632633000      2.736176000
C       -5.506875000     -4.177844000      1.689110000
H       -4.685587000     -4.234738000      2.387706000
C       -3.962317000     -2.941599000     -2.048842000
C       -4.506810000     -2.134581000     -3.071437000
C       -4.876171000     -2.725020000     -4.274006000
H       -5.303665000     -2.113204000     -5.056012000
C       -4.707232000     -4.078705000     -4.491829000
H       -5.000376000     -4.520259000     -5.435316000
C       -4.153037000     -4.861963000     -3.498961000
H       -4.010509000     -5.918597000     -3.677533000
C       -3.774308000     -4.321021000     -2.275283000
C       -4.711073000     -0.613529000     -2.916940000
H       -4.294066000     -0.307275000     -1.959898000
C       -6.210420000     -0.221055000     -2.908651000
H       -6.698017000     -0.527419000     -3.828765000
H       -6.309122000      0.856431000     -2.815230000
H       -6.733507000     -0.679201000     -2.076152000
C       -3.971778000      0.176158000     -4.026404000
H       -4.436015000      0.016337000     -4.993826000
H       -2.932981000     -0.127978000     -4.096802000
H       -4.005424000      1.239590000     -3.808790000
C       -3.147315000     -5.264226000     -1.229212000
H       -2.931820000     -4.690388000     -0.331129000
C       -4.113824000     -6.409925000     -0.835482000
H       -5.071336000     -6.019628000     -0.508930000
H       -3.686787000     -6.992476000     -0.024557000
H       -4.286456000     -7.076622000     -1.673906000
C       -1.809079000     -5.859097000     -1.735242000
H       -1.966958000     -6.482145000     -2.609400000
H       -1.359893000     -6.471925000     -0.959515000
H       -1.108288000     -5.074146000     -1.998741000
C       -4.085628000     -1.626960000      2.731044000
C       -5.232262000     -0.824549000      2.933374000
C       -5.695875000     -0.615631000      4.226722000
H       -6.572956000     -0.002990000      4.380615000
C       -5.060642000     -1.167627000      5.321018000
H       -5.439663000     -0.993756000      6.319407000
C       -3.931756000     -1.936796000      5.126112000
H       -3.429307000     -2.363829000      5.982565000
C       -3.427794000     -2.175956000      3.852761000
C       -5.995316000     -0.129576000      1.787622000
H       -5.530449000     -0.398071000      0.842934000
C       -7.479267000     -0.573283000      1.730021000
H       -7.563854000     -1.653374000      1.689663000
H       -7.956359000     -0.158811000      0.846879000
H       -8.022544000     -0.222544000      2.601147000
C       -5.920116000      1.412508000      1.918228000
H       -6.407623000      1.750104000      2.826883000
H       -6.418281000      1.879436000      1.074041000
H       -4.889475000      1.750053000      1.937367000
C       -2.150170000     -3.029692000      3.741135000
H       -1.865904000     -3.087740000      2.692291000
C       -0.977811000     -2.381760000      4.520468000
H       -0.858046000     -1.338693000      4.247701000
H       -0.050024000     -2.901783000      4.304407000
H       -1.150490000     -2.430930000      5.590433000
C       -2.369590000     -4.480367000      4.240348000
H       -2.672302000     -4.491455000      5.282446000
H       -1.447348000     -5.045767000      4.149969000
H       -3.132813000     -4.986520000      3.659176000
C       -0.359075000      4.723004000      0.170938000
C       -0.449784000      6.233613000      0.300411000
C        0.152436000      7.062284000     -0.642853000
H        0.701923000      6.628222000     -1.465551000
C        0.066947000      8.439959000     -0.523140000
H        0.544276000      9.073410000     -1.259754000
C       -0.626601000      9.004378000      0.536991000
H       -0.695229000     10.081363000      0.628871000
C       -1.232117000      8.186288000      1.478860000
H       -1.777855000      8.620818000      2.306531000
C       -1.141777000      6.808581000      1.362730000
H       -1.623609000      6.175015000      2.092852000
C       -1.237173000      4.676882000     -2.156037000
C       -0.456077000      4.793284000     -3.323663000
C       -1.033111000      5.313542000     -4.476253000
H       -0.439701000      5.396592000     -5.375870000
C       -2.351241000      5.725054000     -4.496496000
H       -2.783298000      6.128067000     -5.403166000
C       -3.115244000      5.610486000     -3.351934000
H       -4.149799000      5.923043000     -3.373487000
C       -2.584467000      5.090777000     -2.177162000
C        1.012914000      4.334094000     -3.385185000
H        1.335676000      4.086952000     -2.376326000
C        1.150675000      3.061581000     -4.256461000
H        0.517654000      2.263384000     -3.881364000
H        2.178323000      2.713595000     -4.254727000
H        0.861817000      3.264703000     -5.282690000
C        1.962414000      5.439509000     -3.912257000
H        1.758275000      5.670817000     -4.952270000
H        2.992165000      5.102347000     -3.839776000
H        1.863667000      6.353846000     -3.336325000
C       -3.517431000      4.943059000     -0.960626000
H       -2.929838000      4.602578000     -0.113020000
C       -4.176041000      6.286239000     -0.559457000
H       -4.856386000      6.635166000     -1.329021000
H       -3.424993000      7.051929000     -0.395462000
H       -4.742525000      6.160432000      0.358549000
C       -4.601751000      3.871659000     -1.233805000
H       -5.245249000      4.171678000     -2.054671000
H       -5.218318000      3.728982000     -0.351824000
H       -4.143830000      2.920882000     -1.489909000
C        0.578635000      4.375920000      2.446600000
C        1.880075000      4.916002000      2.515747000
C        2.399807000      5.275676000      3.753958000
H        3.398560000      5.685389000      3.810259000
C        1.671189000      5.111989000      4.915266000
H        2.095112000      5.393755000      5.870231000
C        0.397724000      4.582237000      4.846844000
H       -0.169955000      4.452013000      5.757453000
C       -0.168386000      4.213863000      3.632113000
C        2.778252000      5.096216000      1.276245000
H        2.208713000      4.823280000      0.392253000
C        3.235969000      6.565744000      1.100088000
H        2.384885000      7.238109000      1.083277000
H        3.777530000      6.675162000      0.165111000
H        3.894030000      6.869163000      1.907454000
C        4.010342000      4.159748000      1.341318000
H        4.651880000      4.419456000      2.177172000
H        4.591870000      4.243062000      0.428014000
H        3.702128000      3.125778000      1.457451000
C       -1.591441000      3.622385000      3.641525000
H       -1.915320000      3.502679000      2.611405000
C       -1.608655000      2.227109000      4.313835000
H       -1.329409000      2.299970000      5.360196000
H       -0.913164000      1.553074000      3.825496000
H       -2.603002000      1.794128000      4.257008000
C       -2.615286000      4.549282000      4.345374000
H       -3.615640000      4.141789000      4.232686000
H       -2.606186000      5.547205000      3.920015000
H       -2.404987000      4.632970000      5.406362000
C       -1.257353000     -2.223356000     -5.684963000
C       -0.318255000     -2.406009000     -4.662966000
C        0.845190000     -1.603061000     -4.573099000
C        1.026296000     -0.617486000     -5.574009000
C        0.091350000     -0.439911000     -6.600736000
C       -1.061919000     -1.236157000     -6.662349000
H       -2.136785000     -2.866885000     -5.726640000
H       -0.469276000     -3.209064000     -3.940352000
H        1.917314000      0.010139000     -5.548877000
H        0.266246000      0.325645000     -7.357895000
H       -1.787312000     -1.098670000     -7.463605000
P        2.077926000     -1.938538000     -3.255400000
H        0.214265000      0.116674000     -2.519898000
H        3.125916000     -1.124866000     -3.760025000
252
TS2P, Imaginary frequency = i34.95 cm-1
Y       -1.768671000     -0.851642000     -0.222284000
Y        0.359794000      1.990237000      0.059662000
Y        1.911587000     -0.907534000     -0.125312000
N       -3.642285000     -2.350625000     -0.479229000
N       -3.074373000     -1.789061000      1.642438000
N       -0.166235000      4.265262000     -0.593201000
N        0.946778000      3.950588000      1.351358000
N        3.767173000     -1.725242000     -1.439447000
N        3.453702000     -2.602043000      0.625176000
C        1.467428000      0.782499000     -1.882169000
H        2.566204000      0.914727000     -1.984387000
H        1.009036000      1.590681000     -2.472297000
C        0.050349000     -0.154917000      1.616887000
H        0.049708000      0.779827000      2.213969000
H       -0.861756000     -0.664452000      1.997933000
H        0.855806000     -0.737215000      2.114768000
C        2.695815000      1.237434000      0.941942000
H        3.660758000      0.748088000      0.679281000
H        2.863079000      2.270192000      0.584575000
H        2.690855000      1.304392000      2.043317000
C        0.033242000     -2.492879000     -0.787823000
H        0.938649000     -3.109857000     -0.942012000
H       -0.573761000     -3.126423000     -0.106791000
H       -0.471252000     -2.531789000     -1.771702000
C       -2.121331000      1.641384000      0.205593000
H       -2.251272000      2.308843000     -0.661765000
H       -2.013152000      2.302729000      1.089685000
H       -3.128495000      1.207240000      0.367229000
C       -3.866183000     -2.550389000      0.841261000
C       -4.867029000     -3.572451000      1.361069000
C       -5.883423000     -3.219759000      2.242795000
H       -5.981443000     -2.194667000      2.565634000
C       -6.780455000     -4.173113000      2.698065000
H       -7.570662000     -3.883937000      3.378998000
C       -6.666235000     -5.490997000      2.283204000
H       -7.366395000     -6.235756000      2.640833000
C       -5.650590000     -5.852963000      1.411078000
H       -5.551304000     -6.881374000      1.088241000
C       -4.757907000     -4.898424000      0.951733000
H       -3.958298000     -5.184264000      0.284268000
C       -4.571434000     -2.768036000     -1.516422000
C       -5.810998000     -2.103299000     -1.656214000
C       -6.646789000     -2.441854000     -2.712292000
H       -7.588868000     -1.925207000     -2.829603000
C       -6.295882000     -3.419927000     -3.623029000
H       -6.959007000     -3.666720000     -4.441729000
C       -5.093264000     -4.079423000     -3.476902000
H       -4.822075000     -4.847485000     -4.187354000
C       -4.221422000     -3.776182000     -2.435864000
C       -6.273537000     -0.987970000     -0.697361000
H       -5.582992000     -0.940173000      0.138627000
C       -6.246285000      0.395120000     -1.390568000
H       -5.249079000      0.619953000     -1.755044000
H       -6.540989000      1.170220000     -0.689248000
H       -6.928208000      0.420917000     -2.234226000
C       -7.682102000     -1.269568000     -0.115988000
H       -7.917221000     -0.538974000      0.652359000
H       -7.730333000     -2.259138000      0.326641000
H       -8.444626000     -1.203192000     -0.884563000
C       -2.899278000     -4.561811000     -2.351995000
H       -2.390384000     -4.273539000     -1.435634000
C       -3.127485000     -6.095120000     -2.302242000
H       -3.510523000     -6.462368000     -3.248443000
H       -3.833953000     -6.369014000     -1.526370000
H       -2.187648000     -6.601448000     -2.102260000
C       -1.971413000     -4.221090000     -3.543792000
H       -2.403736000     -4.565789000     -4.477695000
H       -1.006329000     -4.703105000     -3.418171000
H       -1.817153000     -3.150565000     -3.618450000
C       -3.106267000     -1.890187000      3.093564000
C       -2.440093000     -2.934631000      3.763462000
C       -2.448667000     -2.967857000      5.154089000
H       -1.933932000     -3.767224000      5.668341000
C       -3.094751000     -1.996899000      5.891329000
H       -3.089215000     -2.037526000      6.972716000
C       -3.743552000     -0.968397000      5.235421000
H       -4.242535000     -0.204441000      5.814792000
C       -3.766149000     -0.896389000      3.848412000
C       -1.656066000     -4.031266000      3.019244000
H       -1.803715000     -3.895998000      1.950786000
C       -0.139541000     -3.903777000      3.305229000
H        0.223518000     -2.924593000      3.009237000
H        0.414757000     -4.656602000      2.754887000
H        0.069010000     -4.035823000      4.361780000
C       -2.151480000     -5.453272000      3.381828000
H       -1.943509000     -5.687152000      4.420592000
H       -1.646716000     -6.189579000      2.763371000
H       -3.220115000     -5.544411000      3.218813000
C       -4.478094000      0.302388000      3.192568000
H       -4.495261000      0.139545000      2.118293000
C       -5.943270000      0.476391000      3.666644000
H       -6.524580000     -0.426256000      3.514722000
H       -6.414128000      1.279290000      3.107081000
H       -5.987167000      0.731944000      4.720069000
C       -3.692171000      1.607283000      3.467628000
H       -3.721029000      1.855463000      4.523850000
H       -4.123412000      2.433730000      2.911096000
H       -2.654765000      1.497258000      3.172686000
C        0.380684000      4.853557000      0.498547000
C        0.353199000      6.350921000      0.761046000
C        0.592920000      7.263038000     -0.264850000
H        0.814055000      6.907253000     -1.259862000
C        0.563691000      8.626189000     -0.018378000
H        0.757210000      9.320825000     -0.825550000
C        0.289575000      9.097675000      1.256406000
H        0.265316000     10.163285000      1.448475000
C        0.045165000      8.199246000      2.283991000
H       -0.174451000      8.559177000      3.280820000
C        0.078224000      6.836535000      2.037868000
H       -0.122868000      6.144509000      2.841581000
C       -0.940454000      4.950958000     -1.611284000
C       -0.412619000      5.052332000     -2.917174000
C       -1.167775000      5.666574000     -3.909110000
H       -0.762984000      5.749496000     -4.907929000
C       -2.424206000      6.175078000     -3.645608000
H       -2.997396000      6.649909000     -4.431006000
C       -2.942927000      6.068748000     -2.370945000
H       -3.928266000      6.464004000     -2.168012000
C       -2.228053000      5.464805000     -1.342541000
C        0.977632000      4.508947000     -3.304141000
H        1.403712000      4.006901000     -2.437918000
C        1.958905000      5.641392000     -3.701474000
H        1.583441000      6.202694000     -4.551204000
H        2.920061000      5.216040000     -3.974975000
H        2.119388000      6.332471000     -2.880803000
C        0.877272000      3.475200000     -4.453899000
H        0.593879000      3.957430000     -5.383564000
H        0.139795000      2.711843000     -4.227031000
H        1.838932000      2.993599000     -4.603804000
C       -2.898615000      5.391320000      0.044601000
H       -2.221144000      4.891929000      0.732756000
C       -3.195485000      6.804205000      0.609794000
H       -2.306076000      7.423609000      0.608012000
H       -3.557730000      6.727477000      1.630719000
H       -3.956966000      7.303069000      0.019418000
C       -4.212399000      4.570461000      0.004041000
H       -4.952661000      5.053002000     -0.625363000
H       -4.624955000      4.485392000      1.004940000
H       -4.038065000      3.571784000     -0.380075000
C        1.784724000      4.306955000      2.480007000
C        3.050097000      4.909429000      2.294496000
C        3.837308000      5.195645000      3.403462000
H        4.804088000      5.657280000      3.260099000
C        3.416279000      4.899119000      4.684248000
H        4.044062000      5.131092000      5.534403000
C        2.188035000      4.297015000      4.866269000
H        1.859792000      4.059928000      5.868446000
C        1.362441000      3.992851000      3.789957000
C        3.632343000      5.243450000      0.906538000
H        2.906819000      4.964105000      0.146365000
C        3.929067000      6.756441000      0.750081000
H        3.054565000      7.354231000      0.979560000
H        4.233117000      6.971055000     -0.270138000
H        4.732561000      7.062517000      1.411803000
C        4.924586000      4.433397000      0.635576000
H        5.721915000      4.739434000      1.304791000
H        5.258190000      4.595670000     -0.384900000
H        4.752208000      3.372259000      0.776308000
C        0.015470000      3.309688000      4.095390000
H       -0.493473000      3.118092000      3.153485000
C        0.231854000      1.951970000      4.810405000
H        0.932019000      1.332027000      4.260769000
H       -0.708569000      1.416159000      4.894823000
H        0.625999000      2.099568000      5.810433000
C       -0.917676000      4.206154000      4.948411000
H       -0.463093000      4.444427000      5.904586000
H       -1.853590000      3.689827000      5.138287000
H       -1.144733000      5.136297000      4.438746000
C        4.238053000     -2.571256000     -0.489250000
C        5.526911000     -3.366708000     -0.619697000
C        5.831867000     -4.068174000     -1.783622000
H        5.138437000     -4.065048000     -2.611170000
C        7.014902000     -4.782360000     -1.885414000
H        7.235347000     -5.327260000     -2.794300000
C        7.911733000     -4.798993000     -0.828053000
H        8.837242000     -5.355650000     -0.909185000
C        7.620529000     -4.098333000      0.332700000
H        8.318396000     -4.101637000      1.160062000
C        6.435343000     -3.388934000      0.436124000
H        6.219028000     -2.835398000      1.337710000
C        4.454506000     -1.432912000     -2.684380000
C        3.913803000     -1.897459000     -3.901974000
C        4.558143000     -1.581437000     -5.092501000
H        4.150754000     -1.941635000     -6.026732000
C        5.707030000     -0.815340000     -5.108285000
H        6.193075000     -0.579156000     -6.045825000
C        6.224128000     -0.345648000     -3.917482000
H        7.115214000      0.266047000     -3.932612000
C        5.619927000     -0.639941000     -2.700787000
C        2.621560000     -2.734409000     -3.978853000
H        2.222201000     -2.838654000     -2.973451000
C        1.548057000     -2.029523000     -4.845355000
H        1.376486000     -1.013958000     -4.504890000
H        0.609931000     -2.572351000     -4.787415000
H        1.851584000     -1.992147000     -5.886329000
C        2.876190000     -4.162310000     -4.525373000
H        3.295215000     -4.128565000     -5.525991000
H        1.940290000     -4.711440000     -4.569478000
H        3.559147000     -4.714671000     -3.888932000
C        6.235446000     -0.041120000     -1.422168000
H        5.690769000     -0.422404000     -0.562585000
C        7.722638000     -0.437102000     -1.246175000
H        8.339630000      0.006432000     -2.020498000
H        7.845876000     -1.514013000     -1.287683000
H        8.087000000     -0.087763000     -0.284598000
C        6.088833000      1.499967000     -1.416141000
H        6.631349000      1.945019000     -2.244013000
H        6.483819000      1.908895000     -0.491483000
H        5.044677000      1.785831000     -1.500279000
C        3.586386000     -3.569372000      1.696568000
C        3.285751000     -4.933399000      1.482108000
C        3.340255000     -5.815724000      2.554172000
H        3.106811000     -6.858944000      2.393402000
C        3.678611000     -5.388812000      3.823480000
H        3.711697000     -6.091764000      4.645415000
C        3.973171000     -4.056568000      4.032593000
H        4.238634000     -3.723617000      5.026244000
C        3.938709000     -3.135331000      2.991894000
C        2.873611000     -5.496697000      0.106666000
H        2.931475000     -4.699111000     -0.628203000
C        3.821838000     -6.631157000     -0.357353000
H        4.856758000     -6.307430000     -0.333826000
H        3.577975000     -6.925417000     -1.373880000
H        3.724146000     -7.505028000      0.278104000
C        1.410496000     -6.005244000      0.116392000
H        1.287052000     -6.825170000      0.816509000
H        1.133576000     -6.358733000     -0.872424000
H        0.727492000     -5.210541000      0.396916000
C        4.283118000     -1.667545000      3.311450000
H        4.275818000     -1.104420000      2.381240000
C        3.231070000     -1.038725000      4.257894000
H        3.248660000     -1.520013000      5.230552000
H        2.230835000     -1.141797000      3.850545000
H        3.437658000      0.018051000      4.397837000
C        5.695273000     -1.513223000      3.931600000
H        5.922783000     -0.459951000      4.067047000
H        6.458376000     -1.944330000      3.292446000
H        5.752917000     -1.997519000      4.900841000
C       -4.853738000      2.549646000     -4.318546000
C       -3.737388000      2.097450000     -3.604308000
C       -3.251332000      0.777410000     -3.756487000
C       -3.925550000     -0.062586000     -4.675042000
C       -5.031342000      0.395973000     -5.400675000
C       -5.508569000      1.703366000     -5.224484000
H       -5.201732000      3.573427000     -4.176757000
H       -3.221348000      2.783969000     -2.932550000
H       -3.577392000     -1.085217000     -4.819976000
H       -5.525682000     -0.275485000     -6.103767000
H       -6.370458000      2.058012000     -5.788873000
P       -1.751570000      0.238359000     -2.842350000
H        1.196726000     -0.102212000     -2.488495000
H       -1.405124000     -0.861540000     -3.673058000
252
CP
Y        1.880096000      0.794086000     -0.228533000
Y       -0.365022000     -1.823546000     -0.265521000
Y       -1.698517000      1.256456000     -0.373835000
N        3.781103000      2.259405000     -0.698364000
N        3.598671000      1.327709000      1.358703000
N       -0.499799000     -4.167557000     -0.782995000
N       -1.184511000     -3.590047000      1.292828000
N       -3.546192000      2.379665000     -1.420406000
N       -3.313742000      2.650226000      0.821792000
C       -1.276890000     -0.291262000     -2.243071000
H       -2.338854000      0.034152000     -2.373703000
H       -1.298652000     -1.321486000     -2.635178000
C       -0.113606000      0.367484000      1.455144000
H       -0.341656000     -0.574886000      1.983456000
H        0.822235000      0.701755000      1.950610000
H       -0.861649000      1.077195000      1.887157000
C       -2.700569000     -0.944917000      0.321199000
H       -3.588824000     -0.333411000      0.056058000
H       -2.914777000     -1.899609000     -0.199466000
H       -2.789897000     -1.156604000      1.395515000
C        0.378824000      2.699884000     -0.841650000
H       -0.441349000      3.431416000     -0.983550000
H        1.023819000      3.208536000     -0.093593000
H        0.939186000      2.760709000     -1.797177000
C        2.018898000     -1.576808000      0.719119000
H        3.035466000     -1.489758000      0.290495000
H        1.840262000     -2.669358000      0.639166000
H        2.123082000     -1.373049000      1.797226000
C        4.367641000      2.066573000      0.515013000
C        5.768779000      2.557256000      0.845780000
C        6.780517000      2.404614000     -0.100772000
H        6.555490000      1.942318000     -1.050541000
C        8.072459000      2.822683000      0.171038000
H        8.846811000      2.692672000     -0.573950000
C        8.371627000      3.403022000      1.394634000
H        9.381003000      3.732803000      1.607833000
C        7.374416000      3.555186000      2.345576000
H        7.600512000      4.005391000      3.303533000
C        6.082835000      3.131240000      2.075511000
H        5.316656000      3.256835000      2.825187000
C        4.242289000      3.245458000     -1.662073000
C        4.678722000      2.843991000     -2.942350000
C        5.081088000      3.807236000     -3.861379000
H        5.418386000      3.494117000     -4.839225000
C        5.060794000      5.151663000     -3.554653000
H        5.380673000      5.885779000     -4.282267000
C        4.613962000      5.548747000     -2.310668000
H        4.579475000      6.602858000     -2.075080000
C        4.199558000      4.626270000     -1.358028000
C        4.707107000      1.374493000     -3.399605000
H        4.382435000      0.749402000     -2.572982000
C        3.722975000      1.154634000     -4.574815000
H        2.723591000      1.480331000     -4.303920000
H        3.680410000      0.101974000     -4.834379000
H        4.037101000      1.710082000     -5.452875000
C        6.126892000      0.907873000     -3.809143000
H        6.103220000     -0.144871000     -4.073735000
H        6.835554000      1.035574000     -2.997693000
H        6.491272000      1.463767000     -4.666853000
C        3.662088000      5.186751000     -0.026715000
H        3.411863000      4.358510000      0.630109000
C        4.707210000      6.069761000      0.700707000
H        4.912429000      6.973453000      0.136904000
H        5.641173000      5.536547000      0.838871000
H        4.331416000      6.361906000      1.676710000
C        2.364115000      5.998810000     -0.260626000
H        2.558696000      6.874225000     -0.871449000
H        1.957824000      6.331751000      0.689279000
H        1.616088000      5.393540000     -0.762424000
C        3.961131000      0.964052000      2.716481000
C        3.313286000      1.614753000      3.791521000
C        3.629112000      1.248731000      5.093973000
H        3.142679000      1.750234000      5.918669000
C        4.555822000      0.258820000      5.358803000
H        4.788541000     -0.011643000      6.380435000
C        5.180632000     -0.382331000      4.308770000
H        5.903094000     -1.158555000      4.518445000
C        4.902466000     -0.050703000      2.986667000
C        2.267351000      2.731600000      3.589656000
H        2.051647000      2.811282000      2.526481000
C        0.938057000      2.414866000      4.320946000
H        0.587937000      1.416960000      4.082919000
H        0.173770000      3.126817000      4.023099000
H        1.058751000      2.483657000      5.396841000
C        2.791206000      4.113220000      4.057986000
H        3.061907000      4.089730000      5.108935000
H        2.018901000      4.864788000      3.923447000
H        3.660768000      4.420661000      3.488169000
C        5.643740000     -0.825544000      1.879466000
H        5.298588000     -0.460641000      0.914823000
C        7.175689000     -0.601161000      1.949726000
H        7.419082000      0.454844000      1.926132000
H        7.659775000     -1.083257000      1.105592000
H        7.586391000     -1.024395000      2.860597000
C        5.338693000     -2.343197000      1.947836000
H        5.745700000     -2.779529000      2.854012000
H        5.786991000     -2.849555000      1.098374000
H        4.269983000     -2.526140000      1.930353000
C       -1.000408000     -4.600472000      0.406398000
C       -1.312911000     -6.061836000      0.698651000
C       -1.923566000     -6.861923000     -0.264975000
H       -2.189270000     -6.438998000     -1.221887000
C       -2.206192000     -8.192636000     -0.003776000
H       -2.684867000     -8.798096000     -0.762556000
C       -1.879112000     -8.745256000      1.225140000
H       -2.098412000     -9.785974000      1.429276000
C       -1.270341000     -7.959308000      2.191471000
H       -1.009165000     -8.383351000      3.152424000
C       -0.991117000     -6.627623000      1.930395000
H       -0.510380000     -6.026541000      2.687054000
C       -0.011492000     -5.035599000     -1.835550000
C       -0.663491000     -5.045449000     -3.087697000
C       -0.160740000     -5.842329000     -4.109993000
H       -0.663314000     -5.855251000     -5.066929000
C        0.965195000     -6.619894000     -3.929365000
H        1.342243000     -7.232437000     -4.737612000
C        1.606663000     -6.606560000     -2.706565000
H        2.492144000     -7.211041000     -2.568805000
C        1.140968000     -5.832273000     -1.650952000
C       -1.922042000     -4.205699000     -3.383984000
H       -2.148327000     -3.604758000     -2.505875000
C       -3.165048000     -5.087706000     -3.667127000
H       -3.001035000     -5.728780000     -4.527477000
H       -4.024821000     -4.457070000     -3.873789000
H       -3.406807000     -5.715568000     -2.816400000
C       -1.688908000     -3.242132000     -4.574675000
H       -1.593157000     -3.791465000     -5.505542000
H       -0.785517000     -2.659640000     -4.429731000
H       -2.527419000     -2.558842000     -4.671422000
C        1.931576000     -5.871454000     -0.327733000
H        1.402905000     -5.278106000      0.412300000
C        2.057721000     -7.312467000      0.228695000
H        1.086943000     -7.790187000      0.302875000
H        2.504203000     -7.289306000      1.218412000
H        2.688531000     -7.922492000     -0.409200000
C        3.337080000     -5.246177000     -0.495509000
H        3.932171000     -5.810720000     -1.205819000
H        3.858297000     -5.240914000      0.457139000
H        3.260629000     -4.225014000     -0.851826000
C       -1.860837000     -3.731609000      2.568162000
C       -3.245455000     -4.005701000      2.650315000
C       -3.852480000     -4.070674000      3.899735000
H       -4.911003000     -4.280323000      3.961476000
C       -3.137188000     -3.875870000      5.063611000
H       -3.629881000     -3.933056000      6.025150000
C       -1.784919000     -3.609565000      4.985428000
H       -1.221996000     -3.462295000      5.896378000
C       -1.131169000     -3.532265000      3.761914000
C       -4.141729000     -4.242072000      1.417237000
H       -3.531155000     -4.162038000      0.521830000
C       -4.776141000     -5.656785000      1.437684000
H       -4.022185000     -6.424303000      1.568529000
H       -5.297026000     -5.843691000      0.503287000
H       -5.494091000     -5.745897000      2.246299000
C       -5.265429000     -3.180523000      1.312250000
H       -5.941071000     -3.244376000      2.158759000
H       -5.842918000     -3.344192000      0.407427000
H       -4.851950000     -2.179050000      1.277877000
C        0.380886000     -3.234019000      3.774330000
H        0.718085000     -3.148406000      2.746104000
C        0.687501000     -1.895548000      4.491293000
H        0.079256000     -1.092803000      4.089787000
H        1.732962000     -1.632568000      4.360675000
H        0.489791000     -1.968571000      5.555660000
C        1.199595000     -4.371925000      4.435693000
H        0.896504000     -4.523668000      5.466830000
H        2.255481000     -4.117728000      4.427060000
H        1.076594000     -5.308896000      3.903526000
C       -4.046891000      2.935214000     -0.286994000
C       -5.309504000      3.781435000     -0.264575000
C       -5.463266000      4.852268000     -1.140996000
H       -4.671197000      5.096375000     -1.834016000
C       -6.618150000      5.617608000     -1.118561000
H       -6.723145000      6.451184000     -1.801053000
C       -7.634971000      5.316708000     -0.225020000
H       -8.538477000      5.913612000     -0.209633000
C       -7.492113000      4.248833000      0.648033000
H       -8.284054000      4.006293000      1.344945000
C       -6.334775000      3.487333000      0.630027000
H       -6.230876000      2.649688000      1.304266000
C       -4.195243000      2.410771000     -2.716414000
C       -3.646900000      3.204319000     -3.745576000
C       -4.208253000      3.153920000     -5.015192000
H       -3.784050000      3.753100000     -5.808548000
C       -5.299959000      2.351043000     -5.284870000
H       -5.725348000      2.324770000     -6.279527000
C       -5.840059000      1.578866000     -4.275914000
H       -6.689364000      0.945775000     -4.491748000
C       -5.306577000      1.589345000     -2.991865000
C       -2.421602000      4.108593000     -3.513985000
H       -2.235054000      4.153236000     -2.443987000
C       -1.162752000      3.514627000     -4.192576000
H       -0.975615000      2.504264000     -3.841322000
H       -0.290773000      4.122350000     -3.969608000
H       -1.287240000      3.478684000     -5.270369000
C       -2.648284000      5.561463000     -4.002800000
H       -2.735410000      5.605275000     -5.083212000
H       -1.806931000      6.182329000     -3.709222000
H       -3.549707000      5.986339000     -3.573265000
C       -5.933105000      0.662113000     -1.933581000
H       -5.439892000      0.842460000     -0.982674000
C       -7.443250000      0.943150000     -1.734216000
H       -8.008955000      0.698032000     -2.626971000
H       -7.614374000      1.988367000     -1.498343000
H       -7.827092000      0.340661000     -0.916199000
C       -5.705915000     -0.825716000     -2.299369000
H       -6.204987000     -1.077640000     -3.229639000
H       -6.099558000     -1.467282000     -1.517046000
H       -4.646602000     -1.035497000     -2.413215000
C       -3.517958000      3.305124000      2.101904000
C       -3.148706000      4.655810000      2.279139000
C       -3.279998000      5.239984000      3.532817000
H       -2.990103000      6.272207000      3.670019000
C       -3.763612000      4.525715000      4.611140000
H       -3.856874000      4.996364000      5.581007000
C       -4.119539000      3.203056000      4.440252000
H       -4.490813000      2.642650000      5.286684000
C       -4.009266000      2.575913000      3.204199000
C       -2.546406000      5.506201000      1.144891000
H       -2.604426000      4.942739000      0.218290000
C       -3.315419000      6.833319000      0.930002000
H       -4.373865000      6.647603000      0.780625000
H       -2.930704000      7.345501000      0.052985000
H       -3.202292000      7.495458000      1.781797000
C       -1.049152000      5.791164000      1.414780000
H       -0.920837000      6.369599000      2.324148000
H       -0.621590000      6.352632000      0.590242000
H       -0.495926000      4.862285000      1.521299000
C       -4.403215000      1.090062000      3.107480000
H       -4.353359000      0.793331000      2.063673000
C       -3.411112000      0.208126000      3.905704000
H       -3.451188000      0.445132000      4.964208000
H       -2.393875000      0.363961000      3.562496000
H       -3.656650000     -0.842319000      3.783579000
C       -5.848493000      0.824118000      3.600207000
H       -6.112612000     -0.213174000      3.416909000
H       -6.566389000      1.452689000      3.084053000
H       -5.941517000      1.010521000      4.664925000
C        5.434357000     -2.883720000     -2.703469000
C        4.355715000     -2.121184000     -2.233522000
C        3.098749000     -2.155498000     -2.874837000
C        2.969717000     -2.981903000     -4.016093000
C        4.051055000     -3.728975000     -4.497101000
C        5.290261000     -3.688424000     -3.840307000
H        6.392409000     -2.834162000     -2.185711000
H        4.504518000     -1.481205000     -1.365705000
H        2.009739000     -3.038100000     -4.528978000
H        3.921917000     -4.351074000     -5.383076000
H        6.130612000     -4.273718000     -4.212002000
P        1.648133000     -1.171401000     -2.297691000
H       -0.698492000      0.277596000     -2.989281000
H        1.153839000     -0.787005000     -3.565800000
252
TS3P, Imaginary frequency = i40.78 cm-1
Y       -0.308897000      1.979065000      0.172878000
Y       -1.471183000     -1.362218000      0.205347000
Y        2.063661000     -0.702479000      0.660811000
N       -0.121070000      4.365195000      0.609143000
N       -0.949707000      3.682175000     -1.384275000
N       -3.392929000     -2.634212000      0.887172000
N       -2.575709000     -3.005255000     -1.184325000
N        4.255695000     -1.436218000      1.335499000
N        3.935140000     -1.380365000     -0.906420000
C        1.392788000     -0.769092000      2.972402000
H        2.317815000     -1.237870000      3.369822000
H        0.564844000     -1.403756000      3.322073000
C        0.388009000     -0.073631000     -1.306540000
H       -0.241530000     -0.806598000     -1.853087000
H        0.219862000      0.847185000     -1.906548000
H        1.413532000     -0.366200000     -1.629827000
C        0.559822000     -2.777896000      0.353796000
H        1.593565000     -3.172423000      0.391975000
H        0.052969000     -3.351211000      1.155425000
H        0.177344000     -3.177244000     -0.606382000
C        2.139685000      1.873566000      0.589622000
H        3.201800000      1.555181000      0.594892000
H        2.124968000      2.612552000     -0.239645000
H        2.036083000      2.467221000      1.518121000
C       -2.459621000      0.792388000     -0.704135000
H       -2.826842000      1.764651000     -0.328654000
H       -3.357984000      0.155387000     -0.558058000
H       -2.356504000      0.916498000     -1.795454000
C       -0.684923000      4.740782000     -0.570384000
C       -1.044001000      6.180469000     -0.900297000
C       -1.648065000      6.971834000      0.075345000
H       -1.853165000      6.553342000      1.049842000
C       -2.002629000      8.282398000     -0.197816000
H       -2.474646000      8.882042000      0.569759000
C       -1.755267000      8.822116000     -1.451276000
H       -2.029836000      9.847715000     -1.665386000
C       -1.158457000      8.042794000     -2.430362000
H       -0.963014000      8.456933000     -3.411070000
C       -0.808749000      6.729525000     -2.158749000
H       -0.342142000      6.134748000     -2.929359000
C        0.508414000      5.293366000      1.533842000
C        0.010276000      5.432835000      2.846100000
C        0.646120000      6.297926000      3.730078000
H        0.259109000      6.404988000      4.733482000
C        1.758900000      7.022048000      3.356092000
H        2.238488000      7.692250000      4.057219000
C        2.261417000      6.869808000      2.079551000
H        3.144613000      7.422097000      1.791723000
C        1.664143000      6.017005000      1.159464000
C       -1.202036000      4.644164000      3.373305000
H       -1.592432000      4.030533000      2.566147000
C       -0.775321000      3.698554000      4.523003000
H        0.029304000      3.044122000      4.202508000
H       -1.614087000      3.083034000      4.831115000
H       -0.433536000      4.264632000      5.383666000
C       -2.349469000      5.570730000      3.848684000
H       -3.197285000      4.970540000      4.164706000
H       -2.680688000      6.230091000      3.053190000
H       -2.037575000      6.183339000      4.688255000
C        2.345533000      5.878754000     -0.216251000
H        1.754082000      5.212413000     -0.837961000
C        2.457537000      7.238217000     -0.951682000
H        3.136733000      7.905874000     -0.432406000
H        1.491573000      7.725462000     -1.023331000
H        2.840128000      7.085858000     -1.956507000
C        3.752365000      5.247205000     -0.069844000
H        4.408028000      5.890502000      0.507667000
H        4.197124000      5.101669000     -1.049281000
H        3.693418000      4.285095000      0.428529000
C       -1.546625000      3.767529000     -2.703967000
C       -0.731586000      3.536464000     -3.835383000
C       -1.302324000      3.577119000     -5.101549000
H       -0.680129000      3.409255000     -5.969329000
C       -2.648709000      3.832498000     -5.276039000
H       -3.074525000      3.861003000     -6.270478000
C       -3.445511000      4.050013000     -4.170448000
H       -4.499290000      4.246717000     -4.309388000
C       -2.922512000      4.022386000     -2.881901000
C        0.780959000      3.248280000     -3.734688000
H        1.042307000      3.149596000     -2.683464000
C        1.162682000      1.924413000     -4.443900000
H        0.529687000      1.107913000     -4.115236000
H        2.194334000      1.668893000     -4.221117000
H        1.064307000      2.016043000     -5.520382000
C        1.633866000      4.406638000     -4.311757000
H        1.397323000      4.580158000     -5.356858000
H        2.688668000      4.158812000     -4.239033000
H        1.467521000      5.328904000     -3.766170000
C       -3.890918000      4.265388000     -1.707637000
H       -3.330463000      4.191107000     -0.778477000
C       -4.523344000      5.679055000     -1.767211000
H       -3.761133000      6.447956000     -1.818699000
H       -5.126212000      5.852948000     -0.880846000
H       -5.165395000      5.778144000     -2.636341000
C       -5.013397000      3.197690000     -1.670271000
H       -5.666006000      3.292080000     -2.531849000
H       -5.615466000      3.323737000     -0.775530000
H       -4.597764000      2.196048000     -1.665625000
C       -3.524501000     -3.336238000     -0.263949000
C       -4.618007000     -4.362110000     -0.509343000
C       -4.957650000     -5.290410000      0.472230000
H       -4.426565000     -5.295753000      1.412256000
C       -5.961055000     -6.218754000      0.246854000
H       -6.209795000     -6.937249000      1.017200000
C       -6.641836000     -6.228079000     -0.961213000
H       -7.427420000     -6.952746000     -1.136654000
C       -6.313823000     -5.305909000     -1.943588000
H       -6.843831000     -5.304437000     -2.887305000
C       -5.307676000     -4.380535000     -1.719423000
H       -5.064526000     -3.658830000     -2.484626000
C       -4.330458000     -2.666614000      1.993135000
C       -3.928431000     -3.234327000      3.220450000
C       -4.796839000     -3.185256000      4.304372000
H       -4.491754000     -3.615692000      5.247966000
C       -6.044095000     -2.601038000      4.199898000
H       -6.706079000     -2.571259000      5.055385000
C       -6.442062000     -2.061252000      2.992841000
H       -7.420791000     -1.609226000      2.913076000
C       -5.609815000     -2.084094000      1.879544000
C       -2.561150000     -3.920814000      3.411175000
H       -2.036568000     -3.905908000      2.458333000
C       -2.705386000     -5.405839000      3.832562000
H       -3.186987000     -5.492825000      4.801058000
H       -1.723172000     -5.863912000      3.902308000
H       -3.289273000     -5.968996000      3.112294000
C       -1.688361000     -3.168567000      4.444439000
H       -2.138802000     -3.203911000      5.431227000
H       -1.567852000     -2.129598000      4.159417000
H       -0.704446000     -3.623949000      4.503413000
C       -6.131863000     -1.461591000      0.569461000
H       -5.387567000     -1.612935000     -0.207377000
C       -7.445305000     -2.136482000      0.099024000
H       -7.330152000     -3.213001000      0.034178000
H       -7.723851000     -1.762245000     -0.881677000
H       -8.259128000     -1.922507000      0.783864000
C       -6.342802000      0.064488000      0.710707000
H       -7.097074000      0.286165000      1.458533000
H       -6.668852000      0.484040000     -0.236286000
H       -5.419987000      0.552423000      1.003989000
C       -2.348411000     -3.729509000     -2.421274000
C       -1.831336000     -5.044929000     -2.415651000
C       -1.567429000     -5.672470000     -3.627929000
H       -1.172376000     -6.678647000     -3.626956000
C       -1.793973000     -5.039602000     -4.834056000
H       -1.578396000     -5.546136000     -5.765636000
C       -2.299270000     -3.754898000     -4.838830000
H       -2.479175000     -3.260992000     -5.783433000
C       -2.586361000     -3.085982000     -3.654738000
C       -1.538762000     -5.837099000     -1.124062000
H       -1.803558000     -5.221011000     -0.268622000
C       -2.381813000     -7.136335000     -1.053708000
H       -3.435934000     -6.928615000     -1.197954000
H       -2.254747000     -7.609059000     -0.084344000
H       -2.067637000     -7.841796000     -1.815840000
C       -0.036857000     -6.193364000     -0.989461000
H        0.282478000     -6.845367000     -1.795811000
H        0.135782000     -6.708948000     -0.049466000
H        0.579911000     -5.302030000     -1.005507000
C       -3.155172000     -1.656494000     -3.751329000
H       -3.355464000     -1.300209000     -2.744278000
C       -2.135489000     -0.692371000     -4.405926000
H       -1.184194000     -0.726268000     -3.886782000
H       -2.508366000      0.327053000     -4.374051000
H       -1.962389000     -0.957372000     -5.443969000
C       -4.492273000     -1.604449000     -4.533656000
H       -4.355338000     -1.911945000     -5.565227000
H       -4.877770000     -0.589124000     -4.532659000
H       -5.240320000     -2.248932000     -4.084659000
C        4.777242000     -1.693281000      0.113047000
C        6.156221000     -2.306878000     -0.087579000
C        7.285091000     -1.741594000      0.498284000
H        7.188861000     -0.841939000      1.088018000
C        8.533392000     -2.315613000      0.317119000
H        9.403948000     -1.862348000      0.773603000
C        8.666455000     -3.465951000     -0.445232000
H        9.641662000     -3.915686000     -0.584339000
C        7.546340000     -4.039606000     -1.027446000
H        7.642427000     -4.940482000     -1.619778000
C        6.299536000     -3.461836000     -0.851179000
H        5.427085000     -3.916858000     -1.296533000
C        4.877708000     -1.808635000      2.590103000
C        5.453883000     -0.810292000      3.403006000
C        5.961035000     -1.158926000      4.648296000
H        6.394853000     -0.395697000      5.278928000
C        5.919525000     -2.464525000      5.099596000
H        6.319709000     -2.717807000      6.072549000
C        5.357158000     -3.441672000      4.302656000
H        5.316777000     -4.460053000      4.663235000
C        4.830495000     -3.138415000      3.052143000
C        5.508550000      0.665764000      2.964505000
H        5.235421000      0.712056000      1.913047000
C        4.486923000      1.517134000      3.757789000
H        3.485252000      1.114438000      3.650525000
H        4.488506000      2.540783000      3.394935000
H        4.736055000      1.529744000      4.814265000
C        6.924216000      1.281061000      3.105637000
H        7.210284000      1.374390000      4.147911000
H        6.938187000      2.273731000      2.665216000
H        7.672727000      0.676892000      2.603640000
C        4.167309000     -4.266481000      2.240003000
H        3.890770000     -3.870420000      1.266650000
C        5.127957000     -5.457029000      1.997853000
H        5.380268000     -5.953889000      2.928757000
H        6.047920000     -5.121902000      1.529829000
H        4.657829000     -6.185867000      1.344097000
C        2.867164000     -4.749536000      2.929341000
H        3.082831000     -5.195234000      3.895203000
H        2.370366000     -5.493862000      2.313879000
H        2.185232000     -3.918151000      3.082487000
C        4.377910000     -1.324550000     -2.286559000
C        5.232129000     -0.287399000     -2.723933000
C        5.586858000     -0.211610000     -4.064624000
H        6.234701000      0.587186000     -4.397225000
C        5.121817000     -1.130006000     -4.985213000
H        5.407978000     -1.054803000     -6.025899000
C        4.281053000     -2.139292000     -4.562899000
H        3.909313000     -2.853115000     -5.284427000
C        3.900552000     -2.256598000     -3.230717000
C        5.749243000      0.813811000     -1.779052000
H        5.467768000      0.559077000     -0.761779000
C        7.291837000      0.948783000     -1.817054000
H        7.769280000     -0.007915000     -1.633697000
H        7.620886000      1.647425000     -1.053408000
H        7.630210000      1.319442000     -2.778796000
C        5.086682000      2.172667000     -2.112547000
H        5.342611000      2.493971000     -3.117215000
H        5.423487000      2.933253000     -1.415445000
H        4.005522000      2.098231000     -2.043293000
C        2.928734000     -3.389849000     -2.855024000
H        2.810974000     -3.390828000     -1.774309000
C        1.539353000     -3.140908000     -3.492008000
H        1.600460000     -3.177731000     -4.574873000
H        1.157159000     -2.166452000     -3.209515000
H        0.831223000     -3.896469000     -3.168248000
C        3.448824000     -4.788406000     -3.274498000
H        2.781852000     -5.557676000     -2.896946000
H        4.441723000     -4.978050000     -2.881348000
H        3.491159000     -4.882620000     -4.354458000
C       -5.081191000      2.798395000      2.949546000
C       -3.897303000      2.302156000      2.386112000
C       -3.176519000      1.255026000      2.997982000
C       -3.688576000      0.726702000      4.206104000
C       -4.863549000      1.230998000      4.776485000
C       -5.569968000      2.268028000      4.149785000
H       -5.612249000      3.610437000      2.452834000
H       -3.526627000      2.753479000      1.467817000
H       -3.156448000     -0.081811000      4.706069000
H       -5.228900000      0.808190000      5.712509000
H       -6.484582000      2.659014000      4.593935000
P       -1.584388000      0.603229000      2.321209000
H        1.298637000      0.199365000      3.493646000
H       -0.916017000      0.386025000      3.540670000
252
DP
Y       -0.040680000      2.007309000      0.185581000
Y       -1.658470000     -1.157948000      0.177399000
Y        1.982380000     -0.967596000      0.765034000
N        0.436803000      4.353779000      0.593358000
N       -0.476634000      3.765573000     -1.392479000
N       -3.735432000     -2.144191000      0.895313000
N       -2.992733000     -2.649075000     -1.177727000
N        4.121017000     -1.947438000      1.299725000
N        3.661348000     -1.865231000     -0.915078000
C        1.618815000     -0.995251000      3.138795000
H        2.504708000     -1.491176000      3.577893000
H        0.742512000     -1.560510000      3.502668000
C        0.371979000     -0.125319000     -1.266398000
H       -0.341047000     -0.761027000     -1.833719000
H        0.353129000      0.802941000     -1.879710000
H        1.350653000     -0.566152000     -1.555394000
C        0.143350000     -2.781369000      0.613935000
H        1.094550000     -3.336297000      0.725743000
H       -0.448274000     -3.141770000      1.478289000
H       -0.304154000     -3.246592000     -0.290024000
C        2.353531000      1.584591000      0.668332000
H        3.367973000      1.141065000      0.718698000
H        2.454387000      2.298247000     -0.177971000
H        2.296121000      2.210397000      1.579776000
C       -2.370265000      1.133682000     -0.619399000
H       -2.534814000      2.186236000     -0.325878000
H       -3.347960000      0.677991000     -0.356030000
H       -2.328029000      1.151897000     -1.722452000
C       -0.074246000      4.788800000     -0.589797000
C       -0.235066000      6.259779000     -0.937409000
C       -0.718834000      7.141541000      0.027818000
H       -0.975342000      6.770438000      1.009275000
C       -0.889045000      8.484583000     -0.264077000
H       -1.269475000      9.155043000      0.495719000
C       -0.574952000      8.966641000     -1.526071000
H       -0.705296000     10.017274000     -1.754693000
C       -0.096623000      8.097920000     -2.494883000
H        0.150168000      8.466624000     -3.482127000
C        0.068592000      6.752943000     -2.204353000
H        0.444980000      6.088003000     -2.966847000
C        1.175694000      5.201962000      1.513328000
C        0.692502000      5.414085000      2.821288000
C        1.424341000      6.205988000      3.699635000
H        1.048504000      6.371113000      4.699411000
C        2.618848000      6.784869000      3.324593000
H        3.172772000      7.400181000      4.021244000
C        3.106778000      6.555890000      2.053778000
H        4.053146000      6.991452000      1.766351000
C        2.414342000      5.771942000      1.139218000
C       -0.606797000      4.780511000      3.350952000
H       -1.060132000      4.200355000      2.551221000
C       -0.299182000      3.813867000      4.521140000
H        0.426907000      3.065608000      4.219003000
H       -1.204810000      3.304560000      4.833218000
H        0.099893000      4.352964000      5.374315000
C       -1.643608000      5.841737000      3.797884000
H       -2.553861000      5.348875000      4.125630000
H       -1.897563000      6.513187000      2.984248000
H       -1.265692000      6.436772000      4.622876000
C        3.082240000      5.530086000     -0.228785000
H        2.415713000      4.934880000     -0.846987000
C        3.370818000      6.853654000     -0.981343000
H        4.126909000      7.436438000     -0.466140000
H        2.475429000      7.459117000     -1.066565000
H        3.736270000      6.639360000     -1.981254000
C        4.396968000      4.728253000     -0.060730000
H        5.121956000      5.289779000      0.519191000
H        4.830443000      4.518938000     -1.033594000
H        4.212567000      3.785937000      0.444916000
C       -1.074819000      3.916644000     -2.705406000
C       -0.315523000      3.564286000     -3.844241000
C       -0.894630000      3.665786000     -5.103205000
H       -0.313722000      3.405073000     -5.976662000
C       -2.196836000      4.097967000     -5.263595000
H       -2.629900000      4.171158000     -6.252586000
C       -2.940036000      4.435367000     -4.150753000
H       -3.959465000      4.771302000     -4.278659000
C       -2.406208000      4.353786000     -2.869020000
C        1.146119000      3.076868000     -3.760002000
H        1.408488000      2.957831000     -2.711013000
C        1.334823000      1.704719000     -4.454980000
H        0.603518000      0.985132000     -4.104698000
H        2.326256000      1.315294000     -4.244215000
H        1.231241000      1.795181000     -5.531057000
C        2.137816000      4.102330000     -4.366122000
H        1.908741000      4.294630000     -5.409591000
H        3.150381000      3.714488000     -4.306751000
H        2.107746000      5.044700000     -3.830407000
C       -3.315241000      4.743406000     -1.686503000
H       -2.757140000      4.607342000     -0.762823000
C       -3.750645000      6.228963000     -1.762197000
H       -2.892161000      6.886044000     -1.839590000
H       -4.308615000      6.497597000     -0.870103000
H       -4.388486000      6.400412000     -2.623110000
C       -4.572449000      3.840096000     -1.616810000
H       -5.218799000      4.009821000     -2.471511000
H       -5.138230000      4.061417000     -0.716851000
H       -4.298062000      2.791076000     -1.600209000
C       -3.975156000     -2.826010000     -0.250036000
C       -5.211760000     -3.676977000     -0.483745000
C       -5.665543000     -4.557509000      0.495322000
H       -5.122468000     -4.653527000      1.423526000
C       -6.798966000     -5.325138000      0.281147000
H       -7.136521000     -6.009118000      1.049130000
C       -7.496002000     -5.218626000     -0.912843000
H       -8.382989000     -5.817418000     -1.079440000
C       -7.054063000     -4.342302000     -1.892662000
H       -7.595753000     -4.250813000     -2.825257000
C       -5.918617000     -3.577932000     -1.679851000
H       -5.586210000     -2.889301000     -2.442052000
C       -4.652045000     -2.041921000      2.015950000
C       -4.328841000     -2.686143000      3.229029000
C       -5.143731000     -2.488992000      4.336851000
H       -4.894388000     -2.971384000      5.271613000
C       -6.271382000     -1.693675000      4.266220000
H       -6.893884000     -1.551083000      5.139812000
C       -6.605824000     -1.094430000      3.068310000
H       -7.497507000     -0.485801000      3.012443000
C       -5.818372000     -1.254458000      1.933367000
C       -3.112950000     -3.623985000      3.368773000
H       -2.669005000     -3.749726000      2.383923000
C       -3.517966000     -5.033321000      3.873176000
H       -3.893876000     -4.992793000      4.890099000
H       -2.652134000     -5.688772000      3.861345000
H       -4.285463000     -5.475917000      3.246951000
C       -2.034475000     -3.027755000      4.304520000
H       -2.422360000     -2.903762000      5.310615000
H       -1.704466000     -2.060769000      3.942450000
H       -1.173667000     -3.687967000      4.350721000
C       -6.273270000     -0.567060000      0.630743000
H       -5.566767000     -0.815298000     -0.156852000
C       -7.670602000     -1.068920000      0.185428000
H       -7.694596000     -2.151112000      0.119027000
H       -7.918933000     -0.660211000     -0.789624000
H       -8.436322000     -0.754755000      0.887032000
C       -6.288148000      0.973779000      0.766979000
H       -7.004768000      1.292093000      1.516843000
H       -6.563655000      1.427386000     -0.180336000
H       -5.310255000      1.342735000      1.054221000
C       -2.895732000     -3.404047000     -2.413101000
C       -2.577187000     -4.780661000     -2.403540000
C       -2.422235000     -5.446622000     -3.614012000
H       -2.177410000     -6.499534000     -3.610627000
C       -2.568150000     -4.793004000     -4.821728000
H       -2.439014000     -5.330042000     -5.752231000
C       -2.882033000     -3.448547000     -4.830050000
H       -2.999206000     -2.938759000     -5.776105000
C       -3.055191000     -2.739133000     -3.647340000
C       -2.386536000     -5.595960000     -1.107434000
H       -2.562770000     -4.943818000     -0.256072000
C       -3.395276000     -6.770040000     -1.022481000
H       -4.412776000     -6.423477000     -1.163830000
H       -3.327558000     -7.247536000     -0.049496000
H       -3.182936000     -7.517594000     -1.779615000
C       -0.944378000     -6.146479000     -0.975686000
H       -0.715608000     -6.835971000     -1.781716000
H       -0.837654000     -6.678213000     -0.034866000
H       -0.215695000     -5.343921000     -0.995694000
C       -3.412851000     -1.242841000     -3.743972000
H       -3.571987000     -0.864714000     -2.736973000
C       -2.257922000     -0.432908000     -4.382334000
H       -1.328747000     -0.600314000     -3.849152000
H       -2.483191000      0.629105000     -4.355580000
H       -2.108513000     -0.722052000     -5.417658000
C       -4.719704000     -0.996815000     -4.540285000
H       -4.612150000     -1.304114000     -5.575322000
H       -4.962867000      0.061567000     -4.526518000
H       -5.554597000     -1.540203000     -4.111001000
C        4.523762000     -2.276512000      0.052899000
C        5.796294000     -3.065380000     -0.228133000
C        7.027541000     -2.641494000      0.262941000
H        7.090103000     -1.727524000      0.834695000
C        8.175712000     -3.375435000      0.010564000
H        9.127746000     -3.031183000      0.393734000
C        8.105090000     -4.546069000     -0.728826000
H        9.002049000     -5.120689000     -0.923491000
C        6.881531000     -4.979715000     -1.216137000
H        6.818160000     -5.895663000     -1.789454000
C        5.735110000     -4.242288000     -0.968550000
H        4.781411000     -4.588165000     -1.338622000
C        4.777316000     -2.387727000      2.514486000
C        5.538907000     -1.467883000      3.265282000
C        6.088761000     -1.871306000      4.475304000
H        6.665375000     -1.167419000      5.058780000
C        5.910512000     -3.156584000      4.951169000
H        6.346787000     -3.453330000      5.895909000
C        5.165133000     -4.056298000      4.215820000
H        5.018172000     -5.057451000      4.596383000
C        4.589368000     -3.695339000      3.002704000
C        5.752030000     -0.014561000      2.799760000
H        5.407782000      0.060142000      1.771115000
C        4.914201000      0.969190000      3.653187000
H        3.863364000      0.701797000      3.626932000
H        5.023386000      1.981355000      3.274807000
H        5.242840000      0.955092000      4.687666000
C        7.242447000      0.411070000      2.825591000
H        7.615087000      0.475204000      3.842400000
H        7.352419000      1.389604000      2.367395000
H        7.867132000     -0.289865000      2.281873000
C        3.722129000     -4.731659000      2.263879000
H        3.420546000     -4.307732000      1.309565000
C        4.498176000     -6.038321000      1.964557000
H        4.758924000     -6.558213000      2.880453000
H        5.412682000     -5.828647000      1.419358000
H        3.886304000     -6.703737000      1.362499000
C        2.431482000     -5.039301000      3.062976000
H        2.666451000     -5.509683000      4.012444000
H        1.792334000     -5.712240000      2.498746000
H        1.880047000     -4.125408000      3.262831000
C        4.031906000     -1.870171000     -2.317989000
C        4.985274000     -0.949241000     -2.809114000
C        5.281992000     -0.927247000     -4.165502000
H        6.005837000     -0.216483000     -4.538546000
C        4.665561000     -1.789350000     -5.051206000
H        4.909495000     -1.758394000     -6.104823000
C        3.728570000     -2.683739000     -4.576856000
H        3.238591000     -3.352221000     -5.270633000
C        3.399096000     -2.742330000     -3.226933000
C        5.678828000      0.086675000     -1.904102000
H        5.428399000     -0.131677000     -0.870517000
C        7.222107000      0.044321000     -2.030184000
H        7.596621000     -0.961695000     -1.873856000
H        7.671600000      0.696237000     -1.286902000
H        7.545918000      0.379747000     -3.009675000
C        5.158611000      1.511926000     -2.211187000
H        5.388911000      1.798109000     -3.232566000
H        5.622376000      2.230426000     -1.543069000
H        4.082321000      1.563142000     -2.076723000
C        2.309228000     -3.740529000     -2.796202000
H        2.228375000     -3.709377000     -1.711917000
C        0.942026000     -3.329280000     -3.395575000
H        0.957424000     -3.406055000     -4.477826000
H        0.703259000     -2.304737000     -3.135150000
H        0.152853000     -3.973827000     -3.023770000
C        2.635218000     -5.199334000     -3.206342000
H        1.888708000     -5.872921000     -2.796458000
H        3.607917000     -5.508891000     -2.840350000
H        2.631003000     -5.311670000     -4.285398000
C       -4.567731000      3.161200000      3.236035000
C       -3.482128000      2.561956000      2.582207000
C       -2.788345000      1.477775000      3.159384000
C       -3.224094000      1.018067000      4.424198000
C       -4.301684000      1.623768000      5.081569000
C       -4.983030000      2.697602000      4.490487000
H       -5.080328000      3.999775000      2.764691000
H       -3.166010000      2.958571000      1.619347000
H       -2.707359000      0.185386000      4.899584000
H       -4.609375000      1.252142000      6.059023000
H       -5.820693000      3.168735000      5.003186000
P       -1.317344000      0.694133000      2.365462000
H        1.564842000      0.001071000      3.617131000
H       -0.609884000      0.342111000      3.529770000
252
TS4P, Imaginary frequency = i124.66 cm-1
Y       -0.252693000      1.878068000     -0.236367000
Y        1.887288000     -0.913214000     -0.032590000
Y       -1.635669000     -1.433396000     -0.650809000
N       -0.954006000      4.108934000     -0.807733000
N       -0.260879000      3.766910000      1.318811000
N        4.099454000     -1.392162000     -0.880265000
N        3.687734000     -1.765455000      1.315039000
N       -3.727242000     -2.641053000     -0.967837000
N       -3.192391000     -2.190470000      1.181542000
C       -1.330990000     -2.554409000     -2.863377000
H       -1.580745000     -3.521372000     -2.399319000
H       -0.438233000     -2.716930000     -3.481505000
C       -0.280448000     -0.187083000      1.358325000
H        0.555234000     -0.593641000      1.970192000
H       -0.473428000      0.781980000      1.872888000
H       -1.140018000     -0.796532000      1.696970000
C        0.429302000     -2.906745000     -0.129561000
H       -0.395193000     -3.644509000     -0.110097000
H        1.103803000     -3.311078000     -0.910286000
H        0.930572000     -3.077734000      0.848677000
C       -2.534605000      0.995245000     -0.635800000
H       -3.437527000      0.358506000     -0.572062000
H       -2.756977000      1.770986000      0.127808000
H       -2.611551000      1.504601000     -1.614463000
C        2.160471000      1.584225000      0.440793000
H        2.271127000      2.463682000     -0.227075000
H        3.198158000      1.198707000      0.479144000
H        1.972748000      1.986482000      1.452075000
C       -0.741697000      4.664184000      0.412364000
C       -1.035101000      6.119434000      0.740606000
C       -0.697027000      7.141714000     -0.143740000
H       -0.201013000      6.906515000     -1.072863000
C       -0.978546000      8.462818000      0.164166000
H       -0.704020000      9.245213000     -0.531532000
C       -1.607880000      8.781036000      1.358075000
H       -1.829768000      9.813782000      1.597361000
C       -1.952576000      7.771476000      2.243763000
H       -2.447726000      8.010536000      3.176060000
C       -1.665885000      6.451423000      1.937230000
H       -1.944384000      5.669991000      2.627035000
C       -1.561220000      4.787901000     -1.937091000
C       -0.760147000      5.115129000     -3.052239000
C       -1.350209000      5.714941000     -4.158273000
H       -0.739138000      5.967366000     -5.013524000
C       -2.701826000      5.997737000     -4.186813000
H       -3.143454000      6.466134000     -5.056614000
C       -3.484593000      5.675735000     -3.096273000
H       -4.542618000      5.895777000     -3.122336000
C       -2.942225000      5.073187000     -1.966643000
C        0.752846000      4.825236000     -3.105468000
H        1.046146000      4.354866000     -2.168436000
C        1.086085000      3.841697000     -4.252506000
H        0.485653000      2.942087000     -4.172946000
H        2.133114000      3.558916000     -4.208745000
H        0.897307000      4.295230000     -5.220067000
C        1.599528000      6.114509000     -3.258187000
H        2.654835000      5.858925000     -3.278378000
H        1.435823000      6.798893000     -2.432762000
H        1.360182000      6.632058000     -4.181536000
C       -3.893122000      4.736267000     -0.801393000
H       -3.314324000      4.278780000     -0.002865000
C       -4.567636000      6.007577000     -0.226386000
H       -5.234615000      6.456066000     -0.955320000
H       -3.827586000      6.747612000      0.057553000
H       -5.151599000      5.752479000      0.653002000
C       -4.976746000      3.717919000     -1.234869000
H       -5.610076000      4.131196000     -2.012905000
H       -5.605724000      3.462172000     -0.387811000
H       -4.522752000      2.807522000     -1.611220000
C        0.287883000      4.130582000      2.613321000
C       -0.355778000      3.700214000      3.794633000
C        0.210850000      3.999436000      5.028226000
H       -0.284173000      3.670814000      5.931112000
C        1.390002000      4.709936000      5.126856000
H        1.814237000      4.935223000      6.096405000
C        2.023172000      5.127022000      3.973621000
H        2.949173000      5.679094000      4.050976000
C        1.500281000      4.850395000      2.715635000
C       -1.671463000      2.896386000      3.791469000
H       -1.969610000      2.731661000      2.758392000
C       -1.486545000      1.514292000      4.467966000
H       -0.638516000      0.984164000      4.050301000
H       -2.374494000      0.906412000      4.325646000
H       -1.321557000      1.625928000      5.534483000
C       -2.825050000      3.655738000      4.496234000
H       -2.578834000      3.861102000      5.532884000
H       -3.727278000      3.052654000      4.477573000
H       -3.041838000      4.598491000      4.006584000
C        2.301567000      5.342245000      1.492956000
H        1.777528000      5.045036000      0.588175000
C        2.434255000      6.886542000      1.479253000
H        1.463806000      7.363900000      1.553669000
H        2.905873000      7.210430000      0.556198000
H        3.045436000      7.228995000      2.307761000
C        3.712098000      4.702848000      1.443238000
H        4.311785000      5.016575000      2.291211000
H        4.224005000      5.009595000      0.536112000
H        3.648580000      3.620305000      1.451194000
C        4.610831000     -1.777191000      0.313381000
C        6.073055000     -2.129225000      0.532807000
C        6.727872000     -3.048444000     -0.282258000
H        6.187551000     -3.544769000     -1.074530000
C        8.065685000     -3.343566000     -0.073676000
H        8.561349000     -4.064670000     -0.710851000
C        8.765915000     -2.717870000      0.946554000
H        9.812160000     -2.947087000      1.107122000
C        8.123109000     -1.796254000      1.759296000
H        8.665329000     -1.300016000      2.553885000
C        6.784206000     -1.505609000      1.554577000
H        6.289945000     -0.777423000      2.180601000
C        4.881292000     -1.271152000     -2.097858000
C        4.750080000     -2.253694000     -3.101641000
C        5.432127000     -2.089327000     -4.300471000
H        5.327706000     -2.833378000     -5.077612000
C        6.241813000     -0.990950000     -4.520954000
H        6.765429000     -0.880200000     -5.461536000
C        6.376555000     -0.036359000     -3.533169000
H        7.008378000      0.822831000     -3.709839000
C        5.709254000     -0.154458000     -2.318475000
C        3.856455000     -3.496726000     -2.923580000
H        3.529747000     -3.531223000     -1.886794000
C        4.608089000     -4.820490000     -3.215404000
H        4.882104000     -4.894399000     -4.262466000
H        3.967135000     -5.664103000     -2.976865000
H        5.512877000     -4.905258000     -2.622636000
C        2.595718000     -3.402383000     -3.816506000
H        2.867600000     -3.406361000     -4.867322000
H        2.048321000     -2.489016000     -3.610439000
H        1.940000000     -4.247645000     -3.630174000
C        5.883376000      0.964688000     -1.274745000
H        5.359406000      0.673253000     -0.368871000
C        7.370506000      1.182623000     -0.899779000
H        7.826744000      0.254400000     -0.571597000
H        7.446803000      1.905199000     -0.092572000
H        7.936736000      1.560850000     -1.744396000
C        5.252846000      2.289176000     -1.770813000
H        5.748666000      2.642898000     -2.669131000
H        5.344019000      3.055694000     -1.007374000
H        4.199241000      2.151254000     -1.993884000
C        3.892532000     -2.357963000      2.624409000
C        3.937577000     -3.761494000      2.779056000
C        4.033837000     -4.298822000      4.057145000
H        4.066052000     -5.372492000      4.178781000
C        4.081322000     -3.491812000      5.176886000
H        4.149579000     -3.930638000      6.163664000
C        4.043154000     -2.120266000      5.024831000
H        4.082885000     -1.489960000      5.902040000
C        3.957140000     -1.534080000      3.767178000
C        3.875913000     -4.741753000      1.589878000
H        3.822313000     -4.168068000      0.668590000
C        5.144834000     -5.628958000      1.519462000
H        6.044295000     -5.023046000      1.514538000
H        5.129519000     -6.227459000      0.613415000
H        5.193917000     -6.303470000      2.367896000
C        2.614606000     -5.639181000      1.647284000
H        2.621343000     -6.265929000      2.533072000
H        2.580762000     -6.285283000      0.775112000
H        1.710937000     -5.039815000      1.660156000
C        3.922047000      0.004039000      3.681855000
H        3.987756000      0.287286000      2.634438000
C        2.592110000      0.561970000      4.244307000
H        1.743124000      0.122434000      3.732444000
H        2.549949000      1.639423000      4.116037000
H        2.498088000      0.341135000      5.302852000
C        5.114476000      0.666003000      4.418784000
H        5.042100000      0.520512000      5.491389000
H        5.117128000      1.734571000      4.224811000
H        6.063269000      0.257892000      4.086928000
C       -4.077884000     -2.779918000      0.331277000
C       -5.335150000     -3.516507000      0.777435000
C       -6.540666000     -3.319714000      0.107368000
H       -6.587018000     -2.624580000     -0.717383000
C       -7.686320000     -3.992933000      0.499742000
H       -8.615293000     -3.824475000     -0.029525000
C       -7.642897000     -4.876243000      1.567356000
H       -8.537573000     -5.404114000      1.873445000
C       -6.448946000     -5.079821000      2.242167000
H       -6.405831000     -5.769138000      3.075512000
C       -5.304848000     -4.403514000      1.851102000
H       -4.378916000     -4.574399000      2.378543000
C       -4.354007000     -3.314774000     -2.086294000
C       -5.079617000     -2.550273000     -3.025709000
C       -5.576063000     -3.164841000     -4.167505000
H       -6.121693000     -2.578049000     -4.893099000
C       -5.391217000     -4.515671000     -4.392357000
H       -5.787179000     -4.979675000     -5.286027000
C       -4.702256000     -5.268721000     -3.463346000
H       -4.565592000     -6.326651000     -3.638777000
C       -4.171760000     -4.695705000     -2.312317000
C       -5.346774000     -1.046076000     -2.821436000
H       -5.040000000     -0.787038000     -1.811739000
C       -4.522106000     -0.180613000     -3.805150000
H       -3.458613000     -0.353441000     -3.674864000
H       -4.720059000      0.873427000     -3.634789000
H       -4.779303000     -0.413408000     -4.833714000
C       -6.850813000     -0.692108000     -2.950584000
H       -7.200677000     -0.823154000     -3.969089000
H       -7.008604000      0.346066000     -2.673352000
H       -7.460673000     -1.312239000     -2.301698000
C       -3.407623000     -5.613003000     -1.336105000
H       -3.019302000     -5.003999000     -0.522715000
C       -4.344746000     -6.684931000     -0.722448000
H       -4.690152000     -7.375111000     -1.485380000
H       -5.212716000     -6.228280000     -0.260510000
H       -3.814432000     -7.255830000      0.034082000
C       -2.200071000     -6.312358000     -2.010285000
H       -2.529066000     -6.999535000     -2.782680000
H       -1.643386000     -6.879328000     -1.269866000
H       -1.529934000     -5.589279000     -2.462146000
C       -3.471018000     -2.029036000      2.596045000
C       -4.504678000     -1.173666000      3.043288000
C       -4.728460000     -1.026055000      4.406463000
H       -5.517232000     -0.369228000      4.745207000
C       -3.965220000     -1.699049000      5.339908000
H       -4.159254000     -1.576372000      6.397176000
C       -2.946220000     -2.522452000      4.907118000
H       -2.344325000     -3.044815000      5.637308000
C       -2.677809000     -2.697150000      3.554004000
C       -5.385289000     -0.350381000      2.082422000
H       -5.144366000     -0.631716000      1.061849000
C       -6.897308000     -0.608998000      2.301129000
H       -7.121564000     -1.669245000      2.269461000
H       -7.473058000     -0.114002000      1.524651000
H       -7.224686000     -0.220888000      3.259793000
C       -5.089115000      1.162320000      2.225850000
H       -5.366070000      1.518862000      3.212519000
H       -5.654786000      1.725941000      1.490448000
H       -4.033829000      1.361802000      2.074021000
C       -1.498721000     -3.612853000      3.171665000
H       -1.372273000     -3.571081000      2.093869000
C       -0.182978000     -3.123659000      3.827983000
H       -0.206943000     -3.263523000      4.903465000
H       -0.021423000     -2.070013000      3.629621000
H        0.662493000     -3.681734000      3.438392000
C       -1.746496000     -5.094360000      3.553154000
H       -0.878416000     -5.692291000      3.291399000
H       -2.602806000     -5.500507000      3.026032000
H       -1.920695000     -5.199721000      4.619317000
C        2.698892000      0.562226000     -5.826996000
C        2.356209000      0.486490000     -4.470681000
C        1.030947000      0.205202000     -4.074835000
C        0.061290000     -0.002651000     -5.080877000
C        0.411298000      0.060383000     -6.435254000
C        1.729863000      0.346684000     -6.816448000
H        3.729406000      0.780635000     -6.107353000
H        3.122160000      0.637947000     -3.712347000
H       -0.967794000     -0.218628000     -4.799997000
H       -0.352452000     -0.110810000     -7.193862000
H        1.998461000      0.399410000     -7.870940000
P        0.578863000      0.126608000     -2.293848000
H       -2.161979000     -2.297890000     -3.537064000
H       -0.419596000     -1.011627000     -2.489050000
247
2aP
Y       -1.623535000      1.225441000     -0.269172000
Y        1.784094000      0.810446000     -0.461075000
Y       -0.181060000     -1.993931000     -0.302366000
P       -0.364111000     -0.096080000     -2.288213000
N       -3.566582000      2.272980000     -1.209660000
N       -3.278800000      2.460392000      1.033405000
N        3.293713000      1.413409000      1.455613000
N        3.932132000      1.880959000     -0.678258000
N       -0.110625000     -4.288344000     -1.001549000
N       -0.737400000     -3.903942000      1.138996000
C        0.142362000     -0.008647000      1.435489000
H       -0.654224000      0.607591000      1.902995000
H       -0.024639000     -0.996245000      1.918803000
H        1.054914000      0.351585000      1.946578000
C        0.261720000      2.843347000     -0.050346000
H       -0.226064000      3.076002000      0.917528000
H       -0.232642000      3.483941000     -0.808668000
H        1.264817000      3.295758000      0.062272000
C        2.283672000     -1.691493000     -0.438659000
H        2.306874000     -2.154514000     -1.443553000
H        2.273781000     -2.531171000      0.286410000
H        3.296317000     -1.268845000     -0.294575000
C       -2.502181000     -1.135006000      0.084397000
H       -2.764239000     -1.930998000     -0.640835000
H       -3.426491000     -0.528129000      0.113728000
H       -2.456813000     -1.615637000      1.079855000
C        0.944691000      0.446570000     -3.448407000
C        1.487524000      1.758986000     -3.405687000
H        1.095286000      2.468102000     -2.672053000
C        2.409862000      2.206013000     -4.369116000
H        2.787806000      3.226129000     -4.321528000
C        2.818827000      1.355592000     -5.399640000
H        3.518228000      1.705219000     -6.157729000
C        2.309722000      0.043910000     -5.451076000
H        2.621687000     -0.627550000     -6.251517000
C        1.405741000     -0.407345000     -4.489467000
H        1.015133000     -1.421889000     -4.547105000
C       -4.075399000      2.726933000     -0.037458000
C       -5.426506000      3.416514000      0.076215000
C       -6.368596000      2.945597000      0.986484000
H       -6.131987000      2.092358000      1.604823000
C       -7.611427000      3.549114000      1.089465000
H       -8.336253000      3.169052000      1.797850000
C       -7.925382000      4.634284000      0.285410000
H       -8.896013000      5.107716000      0.366466000
C       -6.993410000      5.110091000     -0.624392000
H       -7.231936000      5.957320000     -1.254432000
C       -5.752534000      4.502680000     -0.731343000
H       -5.029452000      4.882354000     -1.437887000
C       -3.474965000      3.029489000      2.353297000
C       -3.208653000      4.395626000      2.594268000
C       -3.312207000      4.889587000      3.889183000
H       -3.106511000      5.934415000      4.075322000
C       -3.663949000      4.073068000      4.945754000
H       -3.733685000      4.475648000      5.947693000
C       -3.925507000      2.738009000      4.710598000
H       -4.200559000      2.099861000      5.538581000
C       -3.844445000      2.198551000      3.432068000
C       -2.784882000      5.375879000      1.481829000
H       -2.774297000      4.842722000      0.534988000
C       -1.355449000      5.924438000      1.717778000
H       -1.306398000      6.504055000      2.633887000
H       -1.064728000      6.568722000      0.893301000
H       -0.636010000      5.115797000      1.787050000
C       -3.781842000      6.554808000      1.348356000
H       -4.796043000      6.193861000      1.216952000
H       -3.521552000      7.166026000      0.489233000
H       -3.757140000      7.185970000      2.230540000
C       -4.150702000      0.698552000      3.255403000
H       -4.158410000      0.477802000      2.191213000
C       -5.538983000      0.306436000      3.823263000
H       -5.559092000      0.394382000      4.904390000
H       -5.761781000     -0.725018000      3.566527000
H       -6.326171000      0.934394000      3.419930000
C       -3.058000000     -0.176727000      3.917280000
H       -2.076532000      0.068987000      3.527535000
H       -3.249853000     -1.228211000      3.725056000
H       -3.041506000     -0.025393000      4.991973000
C       -4.258526000      2.361749000     -2.483323000
C       -5.305746000      1.475990000     -2.801949000
C       -5.899914000      1.552601000     -4.056825000
H       -6.699201000      0.869446000     -4.307634000
C       -5.481876000      2.476399000     -4.993505000
H       -5.954083000      2.519088000     -5.966258000
C       -4.449243000      3.340045000     -4.682410000
H       -4.117427000      4.055222000     -5.421842000
C       -3.827901000      3.303616000     -3.440460000
C       -5.785445000      0.382504000     -1.830141000
H       -5.284574000      0.527079000     -0.877327000
C       -5.390067000     -1.019120000     -2.356666000
H       -5.904002000     -1.241388000     -3.286452000
H       -5.654328000     -1.781723000     -1.630113000
H       -4.320235000     -1.068156000     -2.537399000
C       -7.309821000      0.455617000     -1.566038000
H       -7.595659000      1.442889000     -1.217788000
H       -7.588582000     -0.268531000     -0.806114000
H       -7.875931000      0.233972000     -2.464545000
C       -2.660500000      4.272087000     -3.172553000
H       -2.388588000      4.191611000     -2.122488000
C       -3.029812000      5.752786000     -3.442782000
H       -3.234217000      5.921588000     -4.494762000
H       -2.202439000      6.394913000     -3.155175000
H       -3.904241000      6.055175000     -2.876161000
C       -1.425290000      3.874507000     -4.016442000
H       -1.157675000      2.838775000     -3.833967000
H       -0.577697000      4.504297000     -3.762858000
H       -1.630441000      3.991478000     -5.075835000
C        4.233291000      1.962304000      0.642813000
C        5.496667000      2.642411000      1.156332000
C        6.757685000      2.258370000      0.710297000
H        6.854104000      1.446666000      0.005734000
C        7.894460000      2.897617000      1.179163000
H        8.869100000      2.584003000      0.827849000
C        7.784202000      3.932926000      2.094581000
H        8.672843000      4.433052000      2.459206000
C        6.531485000      4.326670000      2.539705000
H        6.436108000      5.137835000      3.250062000
C        5.396266000      3.684061000      2.073336000
H        4.421292000      4.001439000      2.409710000
C        4.742663000      2.468355000     -1.730620000
C        4.665581000      3.844830000     -2.020808000
C        5.361914000      4.345281000     -3.116014000
H        5.299111000      5.399338000     -3.348040000
C        6.126594000      3.521679000     -3.917639000
H        6.653564000      3.927683000     -4.771187000
C        6.226123000      2.176909000     -3.613643000
H        6.839485000      1.539424000     -4.234614000
C        5.558743000      1.633339000     -2.523478000
C        3.836608000      4.826933000     -1.169986000
H        3.422247000      4.282703000     -0.326031000
C        2.649823000      5.421867000     -1.967000000
H        3.000685000      5.992641000     -2.820808000
H        2.069754000      6.084106000     -1.331155000
H        1.993498000      4.637317000     -2.327822000
C        4.716236000      5.968677000     -0.600673000
H        5.569612000      5.569318000     -0.063001000
H        4.134531000      6.578215000      0.084557000
H        5.083517000      6.611332000     -1.393912000
C        5.743695000      0.135332000     -2.207862000
H        5.362516000     -0.043442000     -1.205658000
C        7.233618000     -0.294144000     -2.223002000
H        7.630788000     -0.297746000     -3.232415000
H        7.327729000     -1.299875000     -1.824215000
H        7.847147000      0.368997000     -1.622192000
C        4.941159000     -0.759807000     -3.180318000
H        3.882126000     -0.529875000     -3.133281000
H        5.075790000     -1.806244000     -2.923959000
H        5.272962000     -0.612945000     -4.203196000
C        3.547781000      1.201152000      2.874993000
C        2.860441000      1.950597000      3.853378000
C        3.092805000      1.690213000      5.200244000
H        2.565124000      2.265712000      5.947500000
C        3.978369000      0.713437000      5.604971000
H        4.144571000      0.526358000      6.657684000
C        4.643558000     -0.029262000      4.649692000
H        5.327793000     -0.803871000      4.965691000
C        4.447823000      0.193783000      3.292653000
C        1.820769000      3.036130000      3.511624000
H        1.777240000      3.137639000      2.430617000
C        2.179356000      4.422272000      4.107342000
H        2.161816000      4.395246000      5.191770000
H        1.453663000      5.160312000      3.778809000
H        3.162844000      4.755219000      3.796783000
C        0.415744000      2.624165000      4.020079000
H        0.157624000      1.627936000      3.682704000
H       -0.336436000      3.318070000      3.657499000
H        0.382845000      2.630715000      5.104581000
C        5.202642000     -0.718743000      2.305777000
H        5.020722000     -0.363730000      1.296184000
C        6.733963000     -0.702548000      2.541388000
H        7.116547000      0.312056000      2.552982000
H        7.235434000     -1.249022000      1.748069000
H        6.989360000     -1.172835000      3.484905000
C        4.674239000     -2.171986000      2.389157000
H        4.889016000     -2.605646000      3.360539000
H        5.146956000     -2.787786000      1.629791000
H        3.601184000     -2.198478000      2.233521000
C       -0.484953000     -4.839612000      0.182663000
C       -0.582064000     -6.338770000      0.422024000
C       -1.138925000     -7.185422000     -0.533946000
H       -1.524514000     -6.775230000     -1.454599000
C       -1.215502000     -8.550527000     -0.309599000
H       -1.656454000     -9.192989000     -1.060805000
C       -0.730343000     -9.090382000      0.871656000
H       -0.788211000    -10.157732000      1.045992000
C       -0.170046000     -8.257846000      1.828574000
H        0.214551000     -8.671419000      2.751885000
C       -0.099067000     -6.892671000      1.605694000
H        0.344506000     -6.252565000      2.352743000
C       -1.372695000     -4.183480000      2.411074000
C       -2.724616000     -4.591398000      2.476291000
C       -3.312595000     -4.799289000      3.718283000
H       -4.346020000     -5.112425000      3.768043000
C       -2.608656000     -4.611286000      4.890924000
H       -3.084293000     -4.780987000      5.847806000
C       -1.293773000     -4.196080000      4.828645000
H       -0.745057000     -4.041938000      5.747088000
C       -0.659840000     -3.973212000      3.611764000
C       -3.605538000     -4.795213000      1.226765000
H       -3.004567000     -4.606495000      0.341231000
C       -4.145505000     -6.244879000      1.132938000
H       -3.338676000     -6.967122000      1.188208000
H       -4.667575000     -6.385853000      0.191170000
H       -4.842495000     -6.451899000      1.938295000
C       -4.789593000     -3.796009000      1.201576000
H       -5.457848000     -3.962423000      2.040147000
H       -5.358913000     -3.920642000      0.285343000
H       -4.433519000     -2.772395000      1.245213000
C        0.803352000     -3.488227000      3.645117000
H        1.127998000     -3.308418000      2.622547000
C        1.760029000     -4.543538000      4.256714000
H        1.472808000     -4.785045000      5.275065000
H        2.773884000     -4.155550000      4.274512000
H        1.762347000     -5.460515000      3.677842000
C        0.935510000     -2.158590000      4.431042000
H        0.221269000     -1.423261000      4.077660000
H        1.934405000     -1.750596000      4.311440000
H        0.760963000     -2.315822000      5.490251000
C        0.332147000     -5.018374000     -2.173292000
C       -0.493000000     -5.044601000     -3.319913000
C       -0.036627000     -5.686313000     -4.465073000
H       -0.665506000     -5.711372000     -5.343963000
C        1.201875000     -6.297097000     -4.504386000
H        1.537903000     -6.792260000     -5.405950000
C        2.006560000     -6.270560000     -3.383321000
H        2.975652000     -6.748358000     -3.416673000
C        1.597546000     -5.640600000     -2.213250000
C       -1.891574000     -4.394265000     -3.361095000
H       -2.079095000     -3.923780000     -2.398134000
C       -1.974334000     -3.293583000     -4.446321000
H       -1.220263000     -2.533445000     -4.279306000
H       -2.947698000     -2.814593000     -4.411449000
H       -1.837425000     -3.713117000     -5.437856000
C       -3.014002000     -5.438613000     -3.593890000
H       -2.890517000     -5.938336000     -4.549393000
H       -3.980062000     -4.942641000     -3.595144000
H       -3.026188000     -6.193754000     -2.815436000
C        2.563813000     -5.648316000     -1.012366000
H        2.097284000     -5.112094000     -0.189762000
C        2.862349000     -7.089437000     -0.526737000
H        1.945334000     -7.624158000     -0.305331000
H        3.467892000     -7.060438000      0.374359000
H        3.407231000     -7.647147000     -1.281398000
C        3.891341000     -4.923344000     -1.346604000
H        4.439629000     -5.451470000     -2.119782000
H        4.519182000     -4.871630000     -0.462034000
H        3.703611000     -3.912613000     -1.692360000
4
PH3
P        0.000179000     -0.000323000     -0.129058000
H       -0.891042000     -0.793593000      0.645821000
H        1.133501000     -0.370940000      0.647046000
H       -0.245142000      1.169371000      0.643004000
242
A'P
Y        1.981775000      0.275326000     -0.596086000
Y       -0.760425000     -1.713703000     -0.089748000
Y       -1.131172000      1.508138000     -0.339137000
N        4.373024000      0.495769000     -0.986577000
N        3.756827000      0.548820000      1.205324000
N       -1.305251000     -3.891116000     -0.988602000
N       -1.940806000     -3.481616000      1.144712000
N       -2.809265000      2.966146000     -1.272829000
N       -2.298175000      3.304716000      0.924026000
C       -0.304338000     -0.119676000     -1.830633000
H       -0.788511000      0.571468000     -2.566791000
H       -0.077876000     -1.017499000     -2.446189000
C        0.302740000      0.134568000      1.490133000
H       -0.041107000     -0.734136000      2.094060000
H        1.336271000      0.285187000      1.857597000
H       -0.251668000      0.975253000      1.954257000
C       -2.701687000     -0.286859000      0.565661000
H       -3.351899000      0.606250000      0.580505000
H       -3.276517000     -1.015906000     -0.039951000
H       -2.724859000     -0.663848000      1.604595000
C        1.117433000      2.658735000     -0.352338000
H        0.819453000      3.287436000     -1.215735000
H        0.699076000      3.149217000      0.547026000
H        2.203530000      2.843260000     -0.246648000
C        1.712516000     -2.231415000     -0.367486000
H        1.672837000     -2.667240000     -1.383753000
H        1.410555000     -3.054474000      0.310986000
H        2.789428000     -2.121336000     -0.131878000
C        4.764938000      0.646531000      0.305111000
C        6.211780000      0.936664000      0.690694000
C        7.237639000      0.059831000      0.352750000
H        7.008850000     -0.855150000     -0.172279000
C        8.548763000      0.343298000      0.701103000
H        9.336209000     -0.350886000      0.436915000
C        8.850601000      1.510422000      1.385618000
H        9.875335000      1.732340000      1.656173000
C        7.835392000      2.393271000      1.720507000
H        8.063698000      3.309242000      2.250264000
C        6.524414000      2.106622000      1.375582000
H        5.736963000      2.801965000      1.624821000
C        5.257312000      0.689309000     -2.118352000
C        5.741261000     -0.430210000     -2.828468000
C        6.473099000     -0.232894000     -3.992932000
H        6.833518000     -1.088732000     -4.546096000
C        6.751267000      1.037275000     -4.459893000
H        7.321385000      1.171578000     -5.369694000
C        6.300544000      2.133469000     -3.751736000
H        6.523222000      3.126384000     -4.116842000
C        5.558702000      1.985126000     -2.585396000
C        5.476140000     -1.875400000     -2.361452000
H        5.074667000     -1.833376000     -1.352101000
C        4.427041000     -2.580690000     -3.255094000
H        3.473458000     -2.066403000     -3.211004000
H        4.275364000     -3.602177000     -2.920203000
H        4.754121000     -2.606639000     -4.290014000
C        6.769843000     -2.729476000     -2.320193000
H        6.570676000     -3.672501000     -1.819755000
H        7.565831000     -2.221622000     -1.786161000
H        7.125033000     -2.951533000     -3.320915000
C        5.068935000      3.255502000     -1.864008000
H        4.596906000      2.958878000     -0.931859000
C        6.238379000      4.207706000     -1.509811000
H        6.691222000      4.623303000     -2.403844000
H        7.006436000      3.684505000     -0.949914000
H        5.873908000      5.031485000     -0.903146000
C        4.005180000      4.006037000     -2.702410000
H        4.418001000      4.337709000     -3.649992000
H        3.649360000      4.878023000     -2.161779000
H        3.154285000      3.363753000     -2.906784000
C        4.019077000      0.438959000      2.632642000
C        3.702005000      1.496241000      3.510844000
C        3.900458000      1.332356000      4.878052000
H        3.654237000      2.143726000      5.548262000
C        4.401321000      0.157657000      5.398996000
H        4.547252000      0.049324000      6.465595000
C        4.707889000     -0.881379000      4.542580000
H        5.089964000     -1.806321000      4.950771000
C        4.528923000     -0.765211000      3.170286000
C        3.105229000      2.834202000      3.033639000
H        3.074341000      2.824360000      1.947328000
C        1.657815000      3.004739000      3.558887000
H        1.043447000      2.157853000      3.278934000
H        1.210359000      3.905431000      3.150976000
H        1.649256000      3.085367000      4.640976000
C        3.950252000      4.056601000      3.477390000
H        3.908947000      4.187505000      4.553572000
H        3.560991000      4.959224000      3.015546000
H        4.991258000      3.951677000      3.193622000
C        4.854792000     -1.994491000      2.299723000
H        4.769570000     -1.710754000      1.255503000
C        6.296285000     -2.514373000      2.528760000
H        7.020838000     -1.714563000      2.420406000
H        6.529625000     -3.288686000      1.803791000
H        6.406605000     -2.940488000      3.520176000
C        3.835887000     -3.131905000      2.556322000
H        3.909054000     -3.492674000      3.577381000
H        4.024604000     -3.965320000      1.886051000
H        2.823142000     -2.780466000      2.389626000
C       -1.911098000     -4.380737000      0.129291000
C       -2.493258000     -5.784092000      0.222857000
C       -3.243085000     -6.310960000     -0.826462000
H       -3.418981000     -5.716509000     -1.710489000
C       -3.777471000     -7.586507000     -0.742290000
H       -4.361850000     -7.978549000     -1.564671000
C       -3.565819000     -8.356104000      0.391343000
H       -3.982061000     -9.353730000      0.456908000
C       -2.818637000     -7.843122000      1.440759000
H       -2.646063000     -8.438953000      2.327729000
C       -2.288079000     -6.566070000      1.357922000
H       -1.701927000     -6.178804000      2.178062000
C       -1.004044000     -4.646209000     -2.185037000
C       -1.648137000     -4.302539000     -3.394873000
C       -1.312892000     -4.979586000     -4.561264000
H       -1.810705000     -4.721215000     -5.485407000
C       -0.360039000     -5.978913000     -4.565331000
H       -0.112860000     -6.495337000     -5.483376000
C        0.275202000     -6.310904000     -3.385478000
H        1.024498000     -7.090094000     -3.391181000
C       -0.025267000     -5.665365000     -2.191705000
C       -2.719372000     -3.196958000     -3.483609000
H       -2.815600000     -2.733414000     -2.504250000
C       -4.111242000     -3.761167000     -3.866569000
H       -4.082978000     -4.245161000     -4.837769000
H       -4.836501000     -2.954080000     -3.910979000
H       -4.458150000     -4.484271000     -3.136308000
C       -2.311800000     -2.092021000     -4.489662000
H       -2.305882000     -2.471482000     -5.506465000
H       -1.322883000     -1.709335000     -4.262830000
H       -3.015539000     -1.266698000     -4.440700000
C        0.748291000     -6.095338000     -0.928986000
H        0.390007000     -5.509395000     -0.086722000
C        0.518454000     -7.592180000     -0.598621000
H       -0.539437000     -7.821482000     -0.537224000
H        0.978015000     -7.837260000      0.354344000
H        0.960112000     -8.228450000     -1.358512000
C        2.266632000     -5.822094000     -1.069903000
H        2.695978000     -6.412431000     -1.872777000
H        2.777040000     -6.083393000     -0.147674000
H        2.453157000     -4.774340000     -1.277449000
C       -2.620459000     -3.676904000      2.406696000
C       -4.029743000     -3.711805000      2.490119000
C       -4.634075000     -3.864436000      3.732457000
H       -5.712813000     -3.893119000      3.795841000
C       -3.888330000     -3.975901000      4.888779000
H       -4.377851000     -4.098393000      5.845838000
C       -2.511159000     -3.916454000      4.811476000
H       -1.927579000     -3.992326000      5.718214000
C       -1.860160000     -3.762237000      3.593436000
C       -4.945663000     -3.546213000      1.261840000
H       -4.323687000     -3.456746000      0.374719000
C       -5.881826000     -4.765390000      1.065700000
H       -5.317031000     -5.690248000      1.029503000
H       -6.432887000     -4.664274000      0.135366000
H       -6.600196000     -4.837584000      1.875639000
C       -5.788319000     -2.250726000      1.371792000
H       -6.450875000     -2.289914000      2.230263000
H       -6.396976000     -2.126682000      0.481356000
H       -5.146755000     -1.381582000      1.473638000
C       -0.321621000     -3.675194000      3.605058000
H        0.018268000     -3.485568000      2.588851000
C        0.163616000     -2.502561000      4.494429000
H       -0.337023000     -1.578868000      4.223535000
H        1.233197000     -2.359586000      4.376696000
H       -0.036519000     -2.700246000      5.542320000
C        0.337857000     -4.998154000      4.069581000
H        0.023912000     -5.258167000      5.075576000
H        1.418641000     -4.893486000      4.067976000
H        0.078577000     -5.818622000      3.408833000
C       -3.087209000      3.645356000     -0.126492000
C       -4.236615000      4.638746000     -0.017225000
C       -4.359558000      5.718344000     -0.887168000
H       -3.610907000      5.884818000     -1.647169000
C       -5.428862000      6.592781000     -0.774872000
H       -5.508873000      7.431888000     -1.453951000
C       -6.391937000      6.393981000      0.202467000
H       -7.228361000      7.076494000      0.287702000
C       -6.281727000      5.316702000      1.068393000
H       -7.033128000      5.151466000      1.829838000
C       -5.209759000      4.445776000      0.959309000
H       -5.133437000      3.598753000      1.625286000
C       -3.544650000      3.146275000     -2.512651000
C       -2.973337000      3.919658000     -3.546356000
C       -3.628215000      4.018177000     -4.766251000
H       -3.186453000      4.599457000     -5.563165000
C       -4.838237000      3.385561000     -4.982371000
H       -5.336297000      3.473350000     -5.939041000
C       -5.403720000      2.640066000     -3.968442000
H       -6.348143000      2.143108000     -4.140885000
C       -4.779013000      2.506984000     -2.732224000
C       -1.617051000      4.627877000     -3.371397000
H       -1.367897000      4.619729000     -2.313368000
C       -0.508827000      3.851112000     -4.119749000
H       -0.491644000      2.818022000     -3.788969000
H        0.464430000      4.292957000     -3.927564000
H       -0.685191000      3.860618000     -5.191053000
C       -1.633114000      6.105673000     -3.835309000
H       -1.755253000      6.181399000     -4.910534000
H       -0.693366000      6.581716000     -3.571116000
H       -2.437921000      6.659889000     -3.363749000
C       -5.449733000      1.624339000     -1.664907000
H       -4.872779000      1.700056000     -0.748294000
C       -6.892689000      2.086812000     -1.344859000
H       -7.546766000      1.958262000     -2.200891000
H       -6.908055000      3.133208000     -1.057615000
H       -7.294494000      1.501144000     -0.523252000
C       -5.438478000      0.139565000     -2.102556000
H       -6.021173000     -0.003189000     -3.007179000
H       -5.861314000     -0.485054000     -1.322381000
H       -4.422258000     -0.191691000     -2.293566000
C       -2.219796000      4.077106000      2.151688000
C       -1.596968000      5.346804000      2.162169000
C       -1.440992000      6.019339000      3.368113000
H       -0.962491000      6.988560000      3.374767000
C       -1.876176000      5.475140000      4.559924000
H       -1.740370000      6.012810000      5.488959000
C       -2.487039000      4.237867000      4.551291000
H       -2.829293000      3.811369000      5.483647000
C       -2.673548000      3.528547000      3.370177000
C       -1.059169000      6.034407000      0.890653000
H       -1.277020000      5.401649000      0.035130000
C       -1.742316000      7.405389000      0.652429000
H       -2.822446000      7.309943000      0.659992000
H       -1.440351000      7.809672000     -0.309258000
H       -1.459424000      8.117917000      1.420127000
C        0.477467000      6.224582000      0.944119000
H        0.761200000      6.877085000      1.763394000
H        0.827365000      6.672118000      0.018513000
H        0.983063000      5.274248000      1.073816000
C       -3.366046000      2.155234000      3.458150000
H       -3.523366000      1.791016000      2.447702000
C       -2.481058000      1.126907000      4.204946000
H       -2.335478000      1.422533000      5.239182000
H       -1.506665000      1.041776000      3.737503000
H       -2.953105000      0.148857000      4.194518000
C       -4.751613000      2.237789000      4.149619000
H       -5.259715000      1.281299000      4.068834000
H       -5.379760000      2.996210000      3.694879000
H       -4.649591000      2.474544000      5.203439000
P        2.078222000      0.498678000     -3.627010000
H        1.231074000      1.476383000     -4.183223000
H        3.148892000      0.711083000     -4.547878000
H        1.523807000     -0.597709000     -4.321956000
242
TS1'P, Imaginary frequency = i744.82 cm-1
Y       -1.546661000     -1.243867000     -0.591292000
Y       -0.065763000      1.822052000      0.040825000
Y        1.808446000     -0.849812000     -0.278811000
N       -3.680241000     -2.273758000     -1.091821000
N       -3.179879000     -2.047407000      1.107614000
N       -0.648414000      3.962063000     -0.906811000
N        0.111591000      3.963929000      1.224064000
N        4.033069000     -1.214060000     -1.160292000
N        3.516238000     -2.189872000      0.826845000
C        0.294188000      0.234577000     -1.814100000
H        1.180946000      0.080687000     -2.475468000
H       -0.348352000      0.894387000     -2.432153000
C       -0.117226000     -0.388289000      1.532124000
H       -0.246885000      0.509799000      2.176548000
H       -0.964468000     -1.024828000      1.855520000
H        0.754792000     -0.888225000      2.003667000
C        2.331164000      1.445848000      0.667896000
H        3.321787000      0.957637000      0.739569000
H        2.533826000      2.346453000      0.054034000
H        2.132764000      1.814525000      1.693642000
C        0.357059000     -2.908514000     -0.351337000
H        1.060039000     -3.292151000     -1.118327000
H        0.820375000     -3.136127000      0.627112000
H       -0.488818000     -3.621270000     -0.414163000
C       -2.442319000      1.120447000     -0.319796000
H       -2.583836000      1.571108000     -1.318367000
H       -2.579843000      1.957472000      0.394588000
H       -3.341381000      0.506796000     -0.129709000
C       -4.094882000     -2.452935000      0.188853000
C       -5.467940000     -3.013785000      0.535184000
C       -6.596035000     -2.544558000     -0.135177000
H       -6.490571000     -1.776203000     -0.887015000
C       -7.853795000     -3.040577000      0.165915000
H       -8.720191000     -2.662827000     -0.361493000
C       -8.001855000     -4.015047000      1.141349000
H       -8.984686000     -4.404730000      1.375828000
C       -6.886849000     -4.486534000      1.816749000
H       -6.994073000     -5.247448000      2.578995000
C       -5.629056000     -3.987493000      1.517601000
H       -4.766763000     -4.366536000      2.045099000
C       -4.349501000     -2.820906000     -2.254220000
C       -4.922065000     -1.944951000     -3.198461000
C       -5.456095000     -2.461803000     -4.372665000
H       -5.884253000     -1.790325000     -5.103411000
C       -5.454821000     -3.819548000     -4.622361000
H       -5.876205000     -4.206267000     -5.540863000
C       -4.913553000     -4.680372000     -3.687572000
H       -4.915181000     -5.743038000     -3.886107000
C       -4.354206000     -4.210630000     -2.505307000
C       -4.977177000     -0.422144000     -2.971168000
H       -4.714327000     -0.226863000     -1.935074000
C       -3.954523000      0.319724000     -3.865644000
H       -2.943407000     -0.017611000     -3.655394000
H       -4.001240000      1.390338000     -3.689262000
H       -4.155671000      0.137563000     -4.916698000
C       -6.395354000      0.160407000     -3.199159000
H       -6.418551000      1.202170000     -2.893108000
H       -7.138819000     -0.379633000     -2.621658000
H       -6.679426000      0.112701000     -4.244977000
C       -3.747106000     -5.242525000     -1.533557000
H       -3.373437000     -4.716606000     -0.659057000
C       -4.808773000     -6.265119000     -1.053168000
H       -5.139441000     -6.893797000     -1.873345000
H       -5.676877000     -5.764438000     -0.638695000
H       -4.386090000     -6.907935000     -0.286600000
C       -2.547622000     -5.989368000     -2.166450000
H       -2.864036000     -6.579477000     -3.020197000
H       -2.103744000     -6.660278000     -1.436590000
H       -1.793387000     -5.284692000     -2.497770000
C       -3.425708000     -2.057278000      2.537752000
C       -2.710033000     -2.957163000      3.357152000
C       -2.901859000     -2.927230000      4.733525000
H       -2.357167000     -3.620368000      5.359097000
C       -3.775309000     -2.033376000      5.319763000
H       -3.910027000     -2.023663000      6.393283000
C       -4.475941000     -1.152641000      4.520286000
H       -5.158237000     -0.451289000      4.979634000
C       -4.323276000     -1.147959000      3.138884000
C       -1.711387000     -3.986143000      2.791640000
H       -1.639358000     -3.835621000      1.718160000
C       -0.299160000     -3.791409000      3.396893000
H        0.035256000     -2.767352000      3.274794000
H        0.412665000     -4.446173000      2.904288000
H       -0.292292000     -4.025452000      4.456239000
C       -2.177919000     -5.445884000      3.023202000
H       -2.287012000     -5.658406000      4.081994000
H       -1.445942000     -6.135449000      2.613045000
H       -3.128244000     -5.638592000      2.537381000
C       -5.134844000     -0.116993000      2.331101000
H       -4.956692000     -0.288261000      1.274145000
C       -6.658520000     -0.248904000      2.579614000
H       -6.995124000     -1.265506000      2.409454000
H       -7.201430000      0.408539000      1.906943000
H       -6.913104000      0.027664000      3.597280000
C       -4.673072000      1.324625000      2.653606000
H       -4.893145000      1.578718000      3.685340000
H       -5.183893000      2.036153000      2.011756000
H       -3.604620000      1.426294000      2.497468000
C       -0.375137000      4.708861000      0.195754000
C       -0.611584000      6.208922000      0.281952000
C       -0.252969000      7.054136000     -0.765824000
H        0.210284000      6.646065000     -1.651677000
C       -0.473797000      8.419302000     -0.677870000
H       -0.184213000      9.063058000     -1.498399000
C       -1.061765000      8.957879000      0.456399000
H       -1.235668000     10.024697000      0.524214000
C       -1.428123000      8.124909000      1.502898000
H       -1.892481000      8.537209000      2.389418000
C       -1.203139000      6.760883000      1.416645000
H       -1.499693000      6.118260000      2.232452000
C       -1.236783000      4.448901000     -2.136781000
C       -0.449026000      4.460003000     -3.309495000
C       -1.022071000      4.864432000     -4.509033000
H       -0.418996000      4.880880000     -5.406036000
C       -2.346645000      5.249374000     -4.579437000
H       -2.775742000      5.560485000     -5.522782000
C       -3.117869000      5.233257000     -3.434580000
H       -4.154784000      5.533295000     -3.492970000
C       -2.591294000      4.840805000     -2.209059000
C        1.036353000      4.044924000     -3.319728000
H        1.295691000      3.672089000     -2.330802000
C        1.974303000      5.241974000     -3.619148000
H        1.751934000      5.678166000     -4.588002000
H        3.007661000      4.907850000     -3.626467000
H        1.877344000      6.016525000     -2.866055000
C        1.305514000      2.907283000     -4.335727000
H        1.193519000      3.258715000     -5.356201000
H        0.619258000      2.081297000     -4.183867000
H        2.319556000      2.537569000     -4.215794000
C       -3.529670000      4.854001000     -0.985316000
H       -2.966807000      4.528612000     -0.114049000
C       -4.070153000      6.278192000     -0.697860000
H       -3.261244000      6.994862000     -0.613092000
H       -4.630609000      6.282116000      0.232304000
H       -4.732988000      6.606974000     -1.491533000
C       -4.719117000      3.877242000     -1.162161000
H       -5.343038000      4.171137000     -1.999789000
H       -5.333700000      3.877892000     -0.266936000
H       -4.369391000      2.865568000     -1.334197000
C        0.645079000      4.509405000      2.454914000
C        1.840759000      5.261675000      2.467943000
C        2.342873000      5.721151000      3.679391000
H        3.258199000      6.296097000      3.688341000
C        1.704117000      5.452941000      4.873717000
H        2.111120000      5.820213000      5.806519000
C        0.546008000      4.702251000      4.864451000
H        0.050148000      4.484431000      5.799954000
C        0.002862000      4.222739000      3.678152000
C        2.656450000      5.561146000      1.195550000
H        2.122644000      5.161462000      0.337350000
C        2.851115000      7.081381000      0.968939000
H        1.900091000      7.602182000      0.970404000
H        3.335026000      7.254539000      0.012247000
H        3.475799000      7.512597000      1.744117000
C        4.034345000      4.856883000      1.252030000
H        4.644121000      5.259893000      2.054057000
H        4.566106000      5.000827000      0.316472000
H        3.912767000      3.791841000      1.418252000
C       -1.283374000      3.380084000      3.766895000
H       -1.566117000      3.078865000      2.759901000
C       -1.049335000      2.095718000      4.601548000
H       -0.184148000      1.550721000      4.237849000
H       -1.915532000      1.443830000      4.542053000
H       -0.879500000      2.337738000      5.645589000
C       -2.468551000      4.185900000      4.356083000
H       -2.249871000      4.519682000      5.365225000
H       -3.358393000      3.565390000      4.390670000
H       -2.689224000      5.058189000      3.749929000
C        4.444883000     -2.037182000     -0.150799000
C        5.801675000     -2.725977000     -0.136212000
C        6.297656000     -3.336088000     -1.286751000
H        5.712525000     -3.325344000     -2.194121000
C        7.528895000     -3.970460000     -1.274523000
H        7.897533000     -4.443248000     -2.175689000
C        8.283977000     -4.002014000     -0.111674000
H        9.247397000     -4.496707000     -0.102285000
C        7.799849000     -3.399130000      1.039036000
H        8.383670000     -3.417893000      1.950255000
C        6.566408000     -2.767765000      1.027181000
H        6.201545000     -2.294665000      1.926339000
C        4.919895000     -0.746713000     -2.211048000
C        4.679761000     -1.111630000     -3.552384000
C        5.539627000     -0.656370000     -4.546709000
H        5.364734000     -0.950016000     -5.571966000
C        6.611488000      0.161328000     -4.255646000
H        7.268702000      0.504341000     -5.043741000
C        6.825655000      0.550004000     -2.948093000
H        7.650505000      1.210975000     -2.722642000
C        6.002628000      0.113751000     -1.917940000
C        3.486257000     -1.981588000     -3.992817000
H        2.874602000     -2.201119000     -3.119150000
C        2.604265000     -1.219774000     -5.014191000
H        2.256852000     -0.279481000     -4.598433000
H        1.740318000     -1.816645000     -5.285522000
H        3.158695000     -1.004100000     -5.920977000
C        3.931181000     -3.339610000     -4.591938000
H        4.553607000     -3.194143000     -5.469083000
H        3.059073000     -3.915990000     -4.886393000
H        4.491157000     -3.923372000     -3.869239000
C        6.285813000      0.653728000     -0.502777000
H        5.623757000      0.158272000      0.201020000
C        7.741972000      0.388788000     -0.045342000
H        8.447713000      0.967770000     -0.631298000
H        7.998056000     -0.660324000     -0.143840000
H        7.858539000      0.673310000      0.996212000
C        5.978932000      2.169913000     -0.437444000
H        6.641149000      2.727507000     -1.091967000
H        6.114187000      2.535939000      0.575540000
H        4.955531000      2.366118000     -0.740704000
C        3.631717000     -3.088569000      1.959896000
C        3.551077000     -4.489642000      1.805316000
C        3.591040000     -5.297868000      2.936478000
H        3.529941000     -6.370929000      2.821082000
C        3.704459000     -4.762481000      4.203628000
H        3.732988000     -5.410240000      5.069914000
C        3.781107000     -3.391779000      4.354389000
H        3.872073000     -2.973200000      5.346967000
C        3.747357000     -2.540687000      3.256801000
C        3.414645000     -5.183762000      0.434596000
H        3.396056000     -4.421631000     -0.340582000
C        4.616420000     -6.121090000      0.151071000
H        5.558523000     -5.596932000      0.264275000
H        4.556795000     -6.504570000     -0.863173000
H        4.614758000     -6.966584000      0.831110000
C        2.096092000     -5.990411000      0.326028000
H        2.078775000     -6.805474000      1.041988000
H        2.003522000     -6.413313000     -0.669840000
H        1.235181000     -5.357014000      0.507257000
C        3.843694000     -1.023303000      3.514100000
H        3.783042000     -0.511544000      2.557809000
C        2.675305000     -0.518430000      4.397090000
H        2.745975000     -0.918610000      5.403280000
H        1.717368000     -0.813511000      3.983377000
H        2.701168000      0.565376000      4.462032000
C        5.192199000     -0.624091000      4.166055000
H        5.226687000      0.451880000      4.309685000
H        6.032996000     -0.906615000      3.541819000
H        5.313795000     -1.098354000      5.134617000
P       -0.960730000     -2.476812000     -3.333205000
H       -0.356035000     -1.112100000     -2.555947000
H        0.403129000     -2.786063000     -3.555802000
H       -1.087975000     -1.665009000     -4.490953000
242
B'P
Y        1.889450000     -0.912852000     -0.774653000
Y       -1.630054000     -1.157802000     -0.129196000
Y       -0.293097000      1.861338000     -0.138029000
N        4.270886000     -1.342428000     -1.073812000
N        3.397474000     -1.818429000      0.962652000
N       -3.295348000     -2.544600000     -1.165902000
N       -3.490668000     -2.156676000      1.056631000
N       -0.944405000      4.002726000     -0.980398000
N       -0.138459000      3.898252000      1.139971000
C       -0.898592000      0.345169000     -2.045866000
H       -1.655581000      1.128473000     -2.280019000
H       -1.197341000     -0.517753000     -2.668922000
C        0.304267000     -0.214689000      1.396391000
H       -0.385729000     -0.840631000      2.007125000
H        1.290066000     -0.659474000      1.637955000
H        0.324000000      0.727449000      1.987026000
C       -2.544603000      1.026522000      0.691547000
H       -2.669836000      2.123953000      0.773804000
H       -3.420026000      0.723814000      0.082348000
H       -2.740624000      0.647128000      1.710795000
C        2.140300000      1.572487000     -0.697705000
H        2.079615000      2.673971000     -0.608541000
H        2.971642000      1.316752000     -0.010145000
H        2.527411000      1.418249000     -1.722973000
C        0.119367000     -2.769331000     -0.773928000
H       -0.393923000     -2.909412000     -1.742090000
H       -0.436958000     -3.385557000     -0.035277000
H        1.058765000     -3.341151000     -0.897232000
C        4.520072000     -1.730473000      0.199545000
C        5.930426000     -1.972631000      0.721446000
C        6.280594000     -3.139148000      1.393405000
H        5.542250000     -3.909245000      1.551365000
C        7.575272000     -3.326184000      1.851853000
H        7.834002000     -4.242334000      2.366988000
C        8.533693000     -2.345115000      1.651803000
H        9.544621000     -2.491146000      2.011666000
C        8.191743000     -1.173851000      0.992531000
H        8.932233000     -0.399343000      0.839476000
C        6.899299000     -0.990812000      0.529718000
H        6.631119000     -0.071748000      0.030852000
C        5.235779000     -1.509030000     -2.149207000
C        5.526948000     -2.804686000     -2.633633000
C        6.393082000     -2.949123000     -3.709998000
H        6.610181000     -3.939081000     -4.085604000
C        6.973965000     -1.854248000     -4.319493000
H        7.642696000     -1.987099000     -5.159744000
C        6.686281000     -0.589462000     -3.850178000
H        7.135066000      0.267311000     -4.332318000
C        5.828517000     -0.392953000     -2.772976000
C        4.895947000     -4.082729000     -2.045405000
H        4.309110000     -3.810726000     -1.173205000
C        3.932212000     -4.751737000     -3.056618000
H        3.147960000     -4.063632000     -3.355811000
H        3.470775000     -5.624980000     -2.604958000
H        4.465069000     -5.071643000     -3.946122000
C        5.973760000     -5.096661000     -1.584382000
H        5.503055000     -5.930576000     -1.072317000
H        6.681289000     -4.633089000     -0.904944000
H        6.525344000     -5.492251000     -2.430591000
C        5.542984000      1.056891000     -2.339158000
H        4.958986000      1.028735000     -1.423328000
C        6.836220000      1.861403000     -2.046720000
H        7.400513000      2.037969000     -2.956171000
H        7.482075000      1.341461000     -1.347638000
H        6.580028000      2.826634000     -1.619640000
C        4.712757000      1.796543000     -3.417685000
H        5.292725000      1.923448000     -4.326254000
H        4.421830000      2.780153000     -3.060447000
H        3.817174000      1.237144000     -3.665977000
C        3.432404000     -2.188255000      2.369158000
C        3.778656000     -1.251345000      3.363220000
C        3.751236000     -1.633979000      4.700593000
H        4.016770000     -0.914893000      5.462733000
C        3.389095000     -2.911334000      5.075179000
H        3.371990000     -3.190458000      6.120565000
C        3.046423000     -3.830539000      4.102018000
H        2.760674000     -4.830290000      4.397508000
C        3.064023000     -3.497101000      2.753708000
C        4.173118000      0.202133000      3.038444000
H        4.148095000      0.331573000      1.959145000
C        3.168989000      1.205576000      3.658368000
H        2.157117000      0.988785000      3.334116000
H        3.416358000      2.218977000      3.358289000
H        3.193270000      1.160300000      4.742078000
C        5.608921000      0.530939000      3.518738000
H        5.673008000      0.497831000      4.601377000
H        5.889254000      1.528799000      3.194454000
H        6.325819000     -0.174476000      3.113357000
C        2.643354000     -4.574473000      1.734287000
H        2.773060000     -4.165394000      0.736038000
C        3.490528000     -5.868986000      1.828853000
H        4.546389000     -5.672269000      1.682843000
H        3.170753000     -6.568829000      1.062455000
H        3.366491000     -6.348478000      2.794213000
C        1.149359000     -4.936407000      1.914304000
H        0.992044000     -5.459902000      2.851709000
H        0.816567000     -5.579674000      1.105475000
H        0.537404000     -4.042068000      1.917896000
C       -3.989607000     -2.813024000     -0.031845000
C       -5.160559000     -3.779247000      0.042992000
C       -6.147567000     -3.805201000     -0.940263000
H       -6.099335000     -3.117968000     -1.771586000
C       -7.201932000     -4.700438000     -0.856679000
H       -7.963452000     -4.704198000     -1.625829000
C       -7.281151000     -5.586758000      0.206630000
H       -8.104430000     -6.287653000      0.269891000
C       -6.300661000     -5.574187000      1.187248000
H       -6.351964000     -6.267024000      2.017202000
C       -5.249579000     -4.675911000      1.106155000
H       -4.484009000     -4.678819000      1.867762000
C       -3.537531000     -3.150597000     -2.461835000
C       -4.056522000     -2.348460000     -3.501609000
C       -4.268409000     -2.915901000     -4.752198000
H       -4.677329000     -2.309200000     -5.547760000
C       -3.966421000     -4.240518000     -5.001298000
H       -4.136909000     -4.663946000     -5.982432000
C       -3.435011000     -5.016185000     -3.990704000
H       -3.185889000     -6.048493000     -4.192706000
C       -3.210772000     -4.498370000     -2.719767000
C       -4.401851000     -0.856612000     -3.315472000
H       -4.047023000     -0.541006000     -2.336304000
C       -5.930230000     -0.601502000     -3.351945000
H       -6.357673000     -0.937759000     -4.291504000
H       -6.130555000      0.460951000     -3.248864000
H       -6.435002000     -1.117841000     -2.542527000
C       -3.700077000      0.028652000     -4.376389000
H       -4.127843000     -0.128153000     -5.360878000
H       -2.639193000     -0.192453000     -4.428595000
H       -3.821509000      1.077295000     -4.121208000
C       -2.589386000     -5.431285000     -1.661350000
H       -2.483099000     -4.877834000     -0.731407000
C       -3.488131000     -6.661915000     -1.378484000
H       -4.493193000     -6.359979000     -1.106365000
H       -3.072667000     -7.244631000     -0.561640000
H       -3.550880000     -7.303455000     -2.251268000
C       -1.177196000     -5.905210000     -2.089068000
H       -1.230713000     -6.532651000     -2.972525000
H       -0.723865000     -6.484508000     -1.290168000
H       -0.532833000     -5.061230000     -2.311052000
C       -4.164528000     -2.048857000      2.334664000
C       -5.394502000     -1.362886000      2.462908000
C       -5.978940000     -1.241892000      3.717755000
H       -6.919762000     -0.718479000      3.813735000
C       -5.383394000     -1.767511000      4.846877000
H       -5.855854000     -1.662633000      5.814546000
C       -4.173425000     -2.419597000      4.726683000
H       -3.701587000     -2.824289000      5.610951000
C       -3.549632000     -2.570002000      3.493441000
C       -6.118685000     -0.694699000      1.277346000
H       -5.553578000     -0.884847000      0.368905000
C       -7.547049000     -1.261199000      1.076076000
H       -7.530931000     -2.341748000      0.988845000
H       -7.984799000     -0.850777000      0.170939000
H       -8.189581000     -0.997334000      1.909493000
C       -6.189553000      0.841565000      1.464530000
H       -6.790086000      1.100477000      2.330343000
H       -6.641050000      1.300357000      0.590244000
H       -5.197958000      1.260624000      1.599148000
C       -2.192329000     -3.297728000      3.466177000
H       -1.832733000     -3.316097000      2.439217000
C       -1.144293000     -2.549361000      4.328527000
H       -1.098070000     -1.499371000      4.058376000
H       -0.159408000     -2.983815000      4.187901000
H       -1.393772000     -2.613461000      5.382518000
C       -2.309163000     -4.768756000      3.939338000
H       -2.667912000     -4.821758000      4.962124000
H       -1.337284000     -5.250153000      3.896685000
H       -2.991335000     -5.330724000      3.310405000
C       -0.631460000      4.691574000      0.149441000
C       -0.828662000      6.190136000      0.299972000
C       -0.382406000      7.072405000     -0.680890000
H        0.124032000      6.691760000     -1.555677000
C       -0.569556000      8.437494000     -0.535662000
H       -0.212764000      9.112469000     -1.302970000
C       -1.210596000      8.936393000      0.588383000
H       -1.358773000     10.003446000      0.700256000
C       -1.662187000      8.065066000      1.568123000
H       -2.167259000      8.447540000      2.445762000
C       -1.469998000      6.700468000      1.425720000
H       -1.833277000      6.025061000      2.186183000
C       -1.583106000      4.589926000     -2.144911000
C       -0.853851000      4.727713000     -3.343684000
C       -1.489567000      5.243785000     -4.467434000
H       -0.933398000      5.350957000     -5.388176000
C       -2.817904000      5.618863000     -4.433560000
H       -3.295277000      6.018161000     -5.318873000
C       -3.535202000      5.467935000     -3.263073000
H       -4.579620000      5.745844000     -3.243600000
C       -2.943906000      4.958008000     -2.113554000
C        0.619591000      4.297836000     -3.479160000
H        0.965585000      3.947106000     -2.509356000
C        0.757922000      3.128592000     -4.485685000
H        0.097126000      2.309547000     -4.220933000
H        1.778189000      2.758313000     -4.493097000
H        0.507670000      3.451948000     -5.490798000
C        1.544729000      5.467322000     -3.900265000
H        1.272384000      5.849829000     -4.878462000
H        2.573334000      5.122240000     -3.947786000
H        1.496101000      6.285951000     -3.189947000
C       -3.826642000      4.765163000     -0.866191000
H       -3.196851000      4.443293000     -0.041758000
C       -4.527923000      6.076175000     -0.432303000
H       -5.253014000      6.396886000     -1.172729000
H       -3.806395000      6.874420000     -0.293558000
H       -5.051868000      5.921603000      0.506325000
C       -4.873885000      3.650907000     -1.110703000
H       -5.551940000      3.925039000     -1.912591000
H       -5.458815000      3.483815000     -0.211787000
H       -4.385632000      2.719166000     -1.380890000
C        0.441382000      4.388063000      2.378130000
C        1.698231000      5.030355000      2.384137000
C        2.264442000      5.399772000      3.598806000
H        3.228725000      5.888329000      3.606328000
C        1.626253000      5.148918000      4.797217000
H        2.086337000      5.439975000      5.732415000
C        0.395477000      4.522861000      4.790587000
H       -0.103279000      4.327677000      5.729567000
C       -0.215584000      4.140924000      3.602147000
C        2.496900000      5.324542000      1.098685000
H        1.904803000      5.013610000      0.242501000
C        2.792212000      6.837084000      0.937872000
H        1.878707000      7.419418000      0.991649000
H        3.260916000      7.022943000     -0.024001000
H        3.465245000      7.187093000      1.713472000
C        3.820699000      4.520985000      1.062182000
H        4.482775000      4.825290000      1.866296000
H        4.332631000      4.688873000      0.119256000
H        3.629693000      3.457722000      1.162317000
C       -1.590757000      3.449605000      3.680842000
H       -1.960770000      3.315009000      2.668259000
C       -1.478404000      2.051836000      4.338283000
H       -1.162295000      2.136101000      5.373234000
H       -0.756896000      1.433481000      3.815182000
H       -2.440613000      1.548741000      4.316660000
C       -2.636962000      4.299453000      4.446428000
H       -3.609406000      3.818940000      4.392171000
H       -2.726972000      5.294253000      4.023171000
H       -2.370518000      4.400849000      5.493218000
P        1.677317000     -1.410759000     -3.586416000
H        0.034242000      0.670035000     -2.546381000
H        3.049332000     -1.364405000     -3.965009000
H        1.398170000     -0.118808000     -4.124205000
242
D'P
Y        0.045482000      1.982445000     -0.447620000
Y        1.729210000     -1.158268000     -0.357998000
Y       -1.865374000     -1.085157000     -0.790110000
N       -0.290492000      4.285786000     -1.038940000
N        0.390889000      3.836647000      1.069338000
N        3.814608000     -1.931502000     -1.273969000
N        3.436427000     -2.232930000      0.934368000
N       -4.017197000     -2.155920000     -1.045832000
N       -3.384711000     -1.839893000      1.103832000
C       -1.693949000     -1.444714000     -3.159530000
H       -2.570202000     -2.045028000     -3.464663000
H       -0.805776000     -1.996834000     -3.512827000
C       -0.199869000     -0.074411000      1.146999000
H        0.575959000     -0.620236000      1.725573000
H       -0.209122000      0.898023000      1.689783000
H       -1.134522000     -0.546839000      1.512419000
C       -0.014957000     -2.883331000     -0.461399000
H       -0.965942000     -3.447968000     -0.455455000
H        0.551033000     -3.362650000     -1.284467000
H        0.465502000     -3.208308000      0.487007000
C       -2.317848000      1.455982000     -0.914293000
H       -3.320124000      0.993449000     -0.998955000
H       -2.482049000      2.235598000     -0.140004000
H       -2.202825000      1.999187000     -1.873660000
C        2.422078000      1.286334000      0.042322000
H        2.619886000      2.187313000     -0.574096000
H        3.381358000      0.741219000     -0.043499000
H        2.376216000      1.633172000      1.089640000
C        0.051612000      4.803015000      0.169198000
C        0.046590000      6.290078000      0.484489000
C        0.522101000      7.217093000     -0.441194000
H        0.911085000      6.878369000     -1.389270000
C        0.513413000      8.571844000     -0.152361000
H        0.891395000      9.277432000     -0.880902000
C        0.023548000      9.021184000      1.064595000
H        0.014482000     10.080659000      1.289444000
C       -0.454674000      8.108374000      1.992223000
H       -0.841709000      8.450678000      2.943279000
C       -0.440443000      6.753315000      1.704851000
H       -0.820322000      6.051287000      2.430907000
C       -0.848134000      5.045727000     -2.141465000
C       -0.094928000      5.206195000     -3.324428000
C       -0.645823000      5.914987000     -4.386029000
H       -0.067797000      6.049490000     -5.289407000
C       -1.915805000      6.451757000     -4.312488000
H       -2.326338000      7.000362000     -5.150006000
C       -2.660909000      6.272457000     -3.164152000
H       -3.660663000      6.680442000     -3.114068000
C       -2.154097000      5.576965000     -2.072685000
C        1.318427000      4.617364000     -3.508095000
H        1.562889000      4.025883000     -2.627749000
C        1.372472000      3.676187000     -4.737070000
H        0.590189000      2.926830000     -4.681816000
H        2.331261000      3.168473000     -4.773974000
H        1.250242000      4.233456000     -5.660041000
C        2.403823000      5.715741000     -3.642395000
H        3.376081000      5.255265000     -3.791159000
H        2.457862000      6.331140000     -2.750853000
H        2.202005000      6.361713000     -4.491043000
C       -3.070424000      5.396814000     -0.846182000
H       -2.523094000      4.854633000     -0.079242000
C       -3.504717000      6.756146000     -0.242239000
H       -4.140581000      7.301862000     -0.931463000
H       -2.643845000      7.374163000     -0.012153000
H       -4.063808000      6.592829000      0.674359000
C       -4.321860000      4.556882000     -1.205281000
H       -4.938900000      5.071705000     -1.934364000
H       -4.920897000      4.384051000     -0.316314000
H       -4.035963000      3.595314000     -1.618585000
C        0.985550000      4.089295000      2.367991000
C        0.266780000      3.759684000      3.538325000
C        0.859873000      3.961019000      4.779316000
H        0.307765000      3.715981000      5.675679000
C        2.138119000      4.470014000      4.893225000
H        2.581789000      4.620903000      5.868530000
C        2.845943000      4.779841000      3.749299000
H        3.849500000      5.171153000      3.839705000
C        2.298217000      4.598580000      2.484576000
C       -1.160570000      3.175426000      3.513688000
H       -1.449841000      3.017590000      2.476712000
C       -1.223474000      1.808739000      4.242555000
H       -0.451789000      1.137302000      3.883139000
H       -2.188899000      1.340919000      4.076308000
H       -1.090021000      1.933526000      5.311930000
C       -2.199960000      4.139272000      4.141250000
H       -1.946584000      4.366860000      5.171742000
H       -3.183062000      3.678954000      4.128314000
H       -2.259845000      5.071908000      3.591274000
C        3.177364000      4.954764000      1.268500000
H        2.613101000      4.758007000      0.360361000
C        3.572471000      6.453516000      1.265877000
H        2.697386000      7.089317000      1.339023000
H        4.097353000      6.697184000      0.346923000
H        4.228793000      6.681812000      2.099182000
C        4.456282000      4.081510000      1.217604000
H        5.093133000      4.273485000      2.074816000
H        5.022143000      4.308182000      0.319004000
H        4.205758000      3.026344000      1.206777000
C        4.308949000     -2.394038000     -0.101942000
C        5.696513000     -2.990205000      0.056441000
C        6.166235000     -3.962322000     -0.823149000
H        5.530128000     -4.318602000     -1.619920000
C        7.439304000     -4.488437000     -0.673363000
H        7.789999000     -5.247949000     -1.360235000
C        8.259997000     -4.043946000      0.352305000
H        9.255937000     -4.453784000      0.467137000
C        7.802488000     -3.072168000      1.229553000
H        8.439977000     -2.717225000      2.029068000
C        6.527556000     -2.550442000      1.083520000
H        6.178958000     -1.785197000      1.761070000
C        4.540396000     -1.900126000     -2.530678000
C        4.184085000     -2.805196000     -3.552372000
C        4.813191000     -2.712070000     -4.787413000
H        4.537000000     -3.396907000     -5.576876000
C        5.786367000     -1.760749000     -5.027619000
H        6.265535000     -1.703422000     -5.996234000
C        6.142668000     -0.884986000     -4.021999000
H        6.904178000     -0.141790000     -4.212735000
C        5.536395000     -0.934239000     -2.771332000
C        3.106941000     -3.889609000     -3.355449000
H        2.816859000     -3.891793000     -2.307152000
C        3.627109000     -5.310814000     -3.690318000
H        3.863998000     -5.404362000     -4.744889000
H        2.863320000     -6.045078000     -3.451756000
H        4.518298000     -5.552951000     -3.120642000
C        1.846630000     -3.577807000     -4.198299000
H        2.075723000     -3.608861000     -5.258754000
H        1.461603000     -2.591739000     -3.961197000
H        1.069507000     -4.308645000     -3.995982000
C        5.969919000      0.094731000     -1.710361000
H        5.431422000     -0.112309000     -0.789826000
C        7.483697000     -0.003259000     -1.395542000
H        7.754041000     -1.012400000     -1.102837000
H        7.737634000      0.668773000     -0.581032000
H        8.080775000      0.272550000     -2.258441000
C        5.606359000      1.534771000     -2.148918000
H        6.152546000      1.818395000     -3.042719000
H        5.854449000      2.239404000     -1.360937000
H        4.544574000      1.614815000     -2.359278000
C        3.592883000     -2.838702000      2.244368000
C        3.439846000     -4.232280000      2.417205000
C        3.505218000     -4.766349000      3.698749000
H        3.386942000     -5.832268000      3.834530000
C        3.710321000     -3.964616000      4.804350000
H        3.752143000     -4.399888000      5.794187000
C        3.862200000     -2.602969000      4.634455000
H        4.023789000     -1.977029000      5.500800000
C        3.814170000     -2.021501000      3.372662000
C        3.190307000     -5.203779000      1.245507000
H        3.178823000     -4.636360000      0.318633000
C        4.316623000     -6.262731000      1.135583000
H        5.291533000     -5.790803000      1.081391000
H        4.175919000     -6.862815000      0.241464000
H        4.307960000     -6.927925000      1.992727000
C        1.818222000     -5.912333000      1.368330000
H        1.777899000     -6.533624000      2.257037000
H        1.651202000     -6.547056000      0.503173000
H        1.010526000     -5.190471000      1.420503000
C        3.994164000     -0.494400000      3.268777000
H        4.033129000     -0.227553000      2.215650000
C        2.797434000      0.252190000      3.907608000
H        1.860813000     -0.068810000      3.465271000
H        2.898200000      1.323138000      3.758895000
H        2.748282000      0.060675000      4.974788000
C        5.313936000     -0.007825000      3.920318000
H        5.299719000     -0.158833000      4.994567000
H        5.445450000      1.053647000      3.732093000
H        6.173744000     -0.532450000      3.517536000
C       -4.316036000     -2.354783000      0.256105000
C       -5.555070000     -3.111924000      0.717264000
C       -6.820735000     -2.769080000      0.250436000
H       -6.932951000     -1.939624000     -0.431680000
C       -7.939091000     -3.473590000      0.666717000
H       -8.917829000     -3.192231000      0.299875000
C       -7.804841000     -4.534708000      1.548909000
H       -8.678671000     -5.086761000      1.871859000
C       -6.547429000     -4.887609000      2.014459000
H       -6.434245000     -5.718140000      2.699328000
C       -5.430801000     -4.178720000      1.602129000
H       -4.451324000     -4.462347000      1.956393000
C       -4.743220000     -2.751759000     -2.149865000
C       -5.571502000     -1.942827000     -2.955638000
C       -6.192062000     -2.501200000     -4.065866000
H       -6.820368000     -1.882726000     -4.691251000
C       -6.020059000     -3.833616000     -4.389510000
H       -6.511826000     -4.251571000     -5.258051000
C       -5.210010000     -4.625206000     -3.600126000
H       -5.068753000     -5.664481000     -3.862177000
C       -4.562506000     -4.108552000     -2.483461000
C       -5.785814000     -0.445742000     -2.660950000
H       -5.370484000     -0.236312000     -1.678194000
C       -5.036828000      0.434537000     -3.691449000
H       -3.980403000      0.189665000     -3.710009000
H       -5.144745000      1.484810000     -3.437022000
H       -5.438358000      0.283113000     -4.688500000
C       -7.284271000     -0.049430000     -2.628552000
H       -7.731477000     -0.123413000     -3.614152000
H       -7.384645000      0.978533000     -2.292682000
H       -7.850399000     -0.682965000     -1.953829000
C       -3.629301000     -5.035956000     -1.682576000
H       -3.271999000     -4.493497000     -0.811370000
C       -4.360602000     -6.301964000     -1.170803000
H       -4.671725000     -6.935335000     -1.994921000
H       -5.240873000     -6.034305000     -0.595489000
H       -3.698650000     -6.880662000     -0.533173000
C       -2.389458000     -5.429801000     -2.523118000
H       -2.678752000     -6.015998000     -3.389497000
H       -1.703842000     -6.022698000     -1.924670000
H       -1.867391000     -4.543231000     -2.870265000
C       -3.650199000     -1.675886000      2.520109000
C       -4.589041000     -0.715894000      2.965134000
C       -4.789880000     -0.534123000      4.327073000
H       -5.503142000      0.204889000      4.663994000
C       -4.092466000     -1.273207000      5.262789000
H       -4.263774000     -1.119423000      6.319918000
C       -3.167914000     -2.202253000      4.832673000
H       -2.614935000     -2.773877000      5.564731000
C       -2.929957000     -2.418468000      3.479410000
C       -5.372526000      0.190840000      1.995237000
H       -5.188169000     -0.145140000      0.979621000
C       -6.901614000      0.133889000      2.236600000
H       -7.258203000     -0.890475000      2.228055000
H       -7.419646000      0.683173000      1.455936000
H       -7.165473000      0.578230000      3.190397000
C       -4.875069000      1.654099000      2.090374000
H       -5.067728000      2.065966000      3.075864000
H       -5.384554000      2.272430000      1.357467000
H       -3.807662000      1.707131000      1.900695000
C       -1.846430000     -3.445241000      3.097651000
H       -1.808004000     -3.510502000      2.012913000
C       -0.457542000     -2.982562000      3.605667000
H       -0.419626000     -2.994944000      4.689990000
H       -0.242943000     -1.973420000      3.274691000
H        0.321718000     -3.641640000      3.235741000
C       -2.140704000     -4.863860000      3.649107000
H       -1.385318000     -5.559618000      3.295730000
H       -3.110210000     -5.226456000      3.326964000
H       -2.122607000     -4.871450000      4.733962000
P        0.987331000      0.400277000     -2.591682000
H       -1.737710000     -0.519976000     -3.766762000
H        0.496463000      0.090667000     -3.873212000
H        2.222804000      0.988245000     -2.956033000
242
TS4'P, Imaginary frequency = i312.77 cm-1
Y        0.083597000      1.808766000     -0.338704000
Y        1.674976000     -1.212623000     -0.248863000
Y       -1.804516000     -1.232757000     -0.712779000
N       -0.188396000      4.073876000     -1.079467000
N        0.476201000      3.765003000      1.061962000
N        3.728070000     -1.972385000     -1.269375000
N        3.463621000     -2.241147000      0.973691000
N       -4.080377000     -2.048665000     -1.013837000
N       -3.449871000     -1.662288000      1.122443000
C       -1.682196000     -2.494743000     -2.889536000
H       -2.182119000     -3.331412000     -2.376095000
H       -0.810694000     -2.916049000     -3.406903000
C       -0.215516000     -0.215331000      1.319909000
H        0.556559000     -0.760335000      1.907077000
H       -0.243781000      0.760283000      1.855624000
H       -1.153685000     -0.688856000      1.666851000
C        0.004290000     -3.015885000     -0.258048000
H       -0.920031000     -3.619669000     -0.195060000
H        0.573473000     -3.513587000     -1.067860000
H        0.525212000     -3.261228000      0.693986000
C       -2.297535000      1.306289000     -0.814411000
H       -3.293392000      0.825880000     -0.818090000
H       -2.425359000      2.090183000     -0.038689000
H       -2.242475000      1.844758000     -1.779296000
C        2.438887000      1.178375000      0.164610000
H        2.643160000      2.036337000     -0.507469000
H        3.394409000      0.624636000      0.142482000
H        2.374193000      1.596780000      1.185072000
C        0.150859000      4.668333000      0.092702000
C        0.137276000      6.172560000      0.315578000
C        0.608408000      7.052191000     -0.657252000
H        1.007298000      6.667312000     -1.583353000
C        0.581388000      8.420820000     -0.443756000
H        0.956383000      9.089406000     -1.207866000
C        0.076829000      8.931292000      0.742604000
H        0.053738000     10.001425000      0.907943000
C       -0.399447000      8.065854000      1.715576000
H       -0.799430000      8.455845000      2.642599000
C       -0.367028000      6.697459000      1.503545000
[truncated: 24,211 more chars]
